# Supplementary material
Source: PubMed Central journal article supplement (PMC3887553)
Supplement: NIHMS514223-supplement-1.pdf [file NIHMS514223-supplement-1.pdf]

**Supplementary Information for *Genomic Analysis Identifies Targets of Convergent Positive Selection in Mycobacterium tuberculosis*:**

**Supplementary Figure 1:** Pairwise convergence for a single nucleotide (genomic coordinate 2155168) in gene *katG*. Branch lengths are not to scale. Nodes are labeled by epicluster name and substitution cluster group (SCG), isolates in orange represent the resistant (R) or more resistant (+R) (ie. To additional drugs) member for each epicluster pair. This figure demonstrates the repeated change from base C to G at position 944 of the *katG* with the acquisition of resistance.

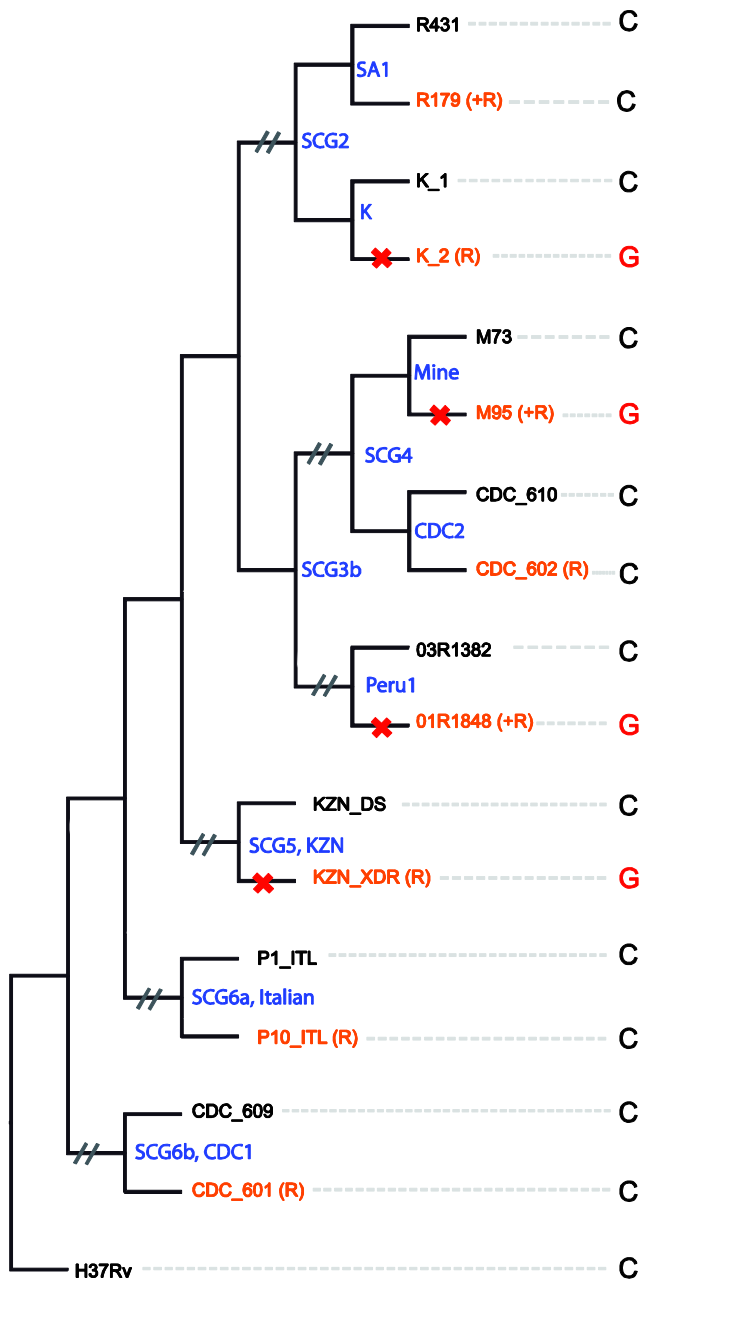

**Supplementary Figure 2:** MTB cell wall structure indicating drug targets and selected TIM gene functions. Genes are connected to their biosynthetic products with lines. PDIM: phthiocerol dimycocerosate MPM: Mannosyl-beta1-phosphomycoketides, SGL: sulfoglycolipid, PAT: polyacyltrehaloses.

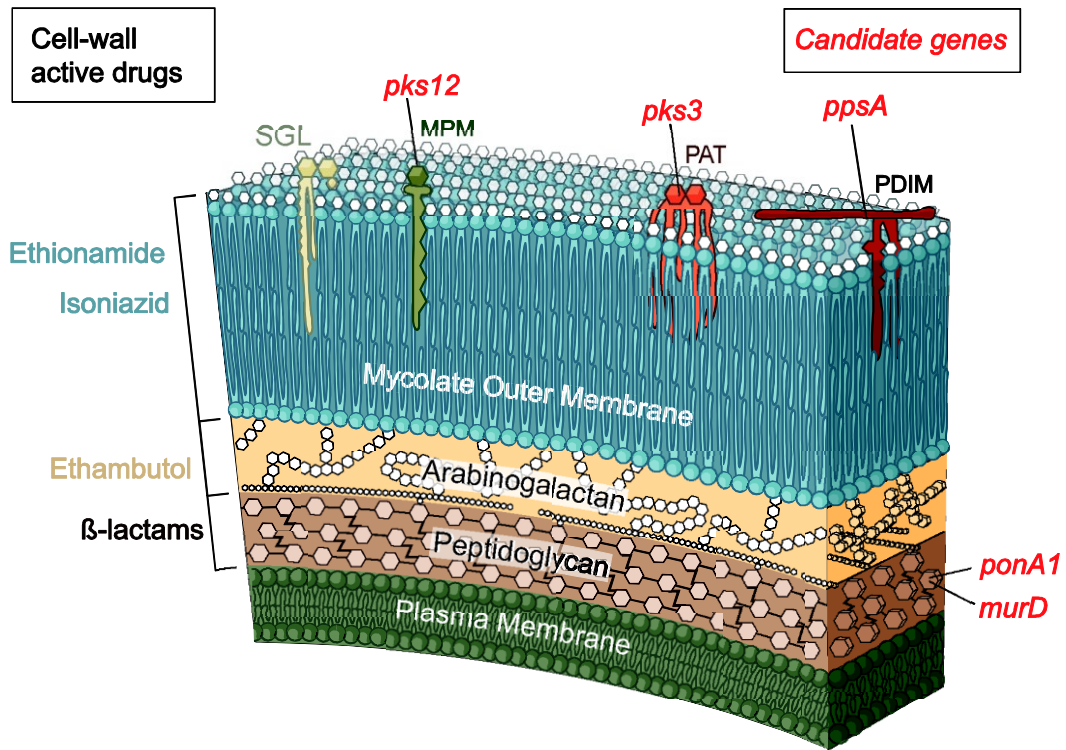

**Supplementary Figure 3: Phylogenetic convergence (PhyC):** This figure shows an example  $p$ -value calculation for a nucleotide site  $y$  in the genome that undergoes a nonsynonymous mutation ( $x \rightarrow G$ ) in 4 resistance (R) branches and 2 sensitive (S) branches. The  $p$ -value for this site is obtained by resampling (10,000 times) 6 SNPs from the genomewide distribution of SNPs (depicted as an urn containing balls), including those occurring on R (orange balls) and S (white balls) branches. The  $p$ -value is equal to the fraction of resamplings (out of 10,000) for which  $\geq 4$  R and  $\leq 2$  S SNPs are picked. If  $p < 0.05$ , site  $y$  is considered to be a significant R-specific target of independent mutation (TIM). Please note that the tree topology here is not accurate and is simply used as an example.

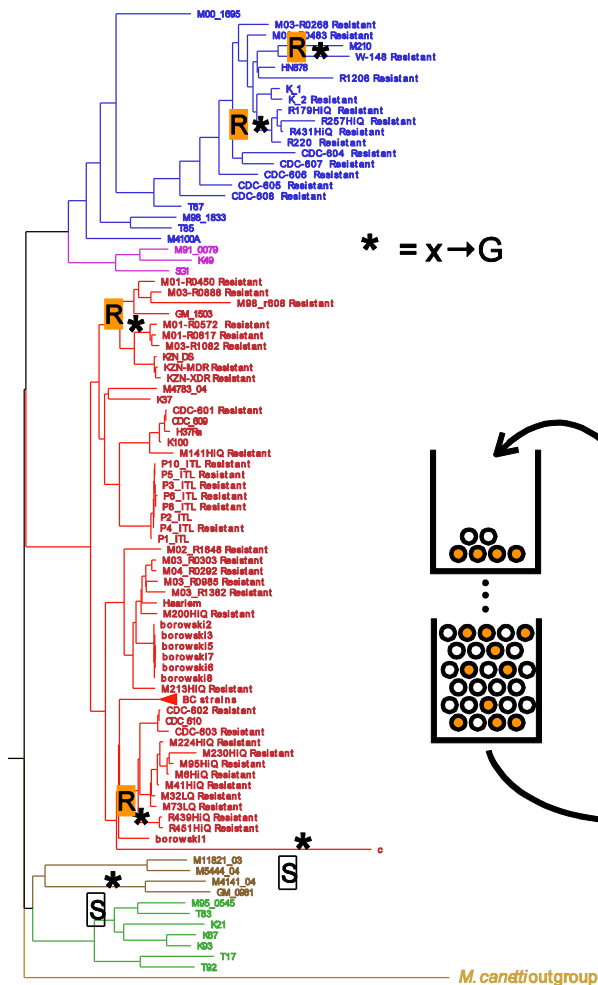

### Convergence in coding SNPs among Rstrains

- Build phylogeny and reconstruct ancestral sequences
  - Define internal branches as R or S using parsimony criterion
  - For each SNP in the genome, count the branches where it occurs, e.g.
    - $x \rightarrow G$  at site  $y$  occurs in 6 branches:
      - 4 R branches ●●●●
      - 2 S branches ○○
    - add 4 R and 2 S counts to the pool
  - Assess significance by sampling:
    - For each SNP in the genome
      - pick the observed number of branches (e.g. 6 for site  $y$ ) at random from the pool
    - resample 10,000 times
- $p$  value = fraction of samples with  $\geq 4$  R and  $\leq 2$  S

Supplementary Figure 4: Frequency histogram of average read depth per isolate

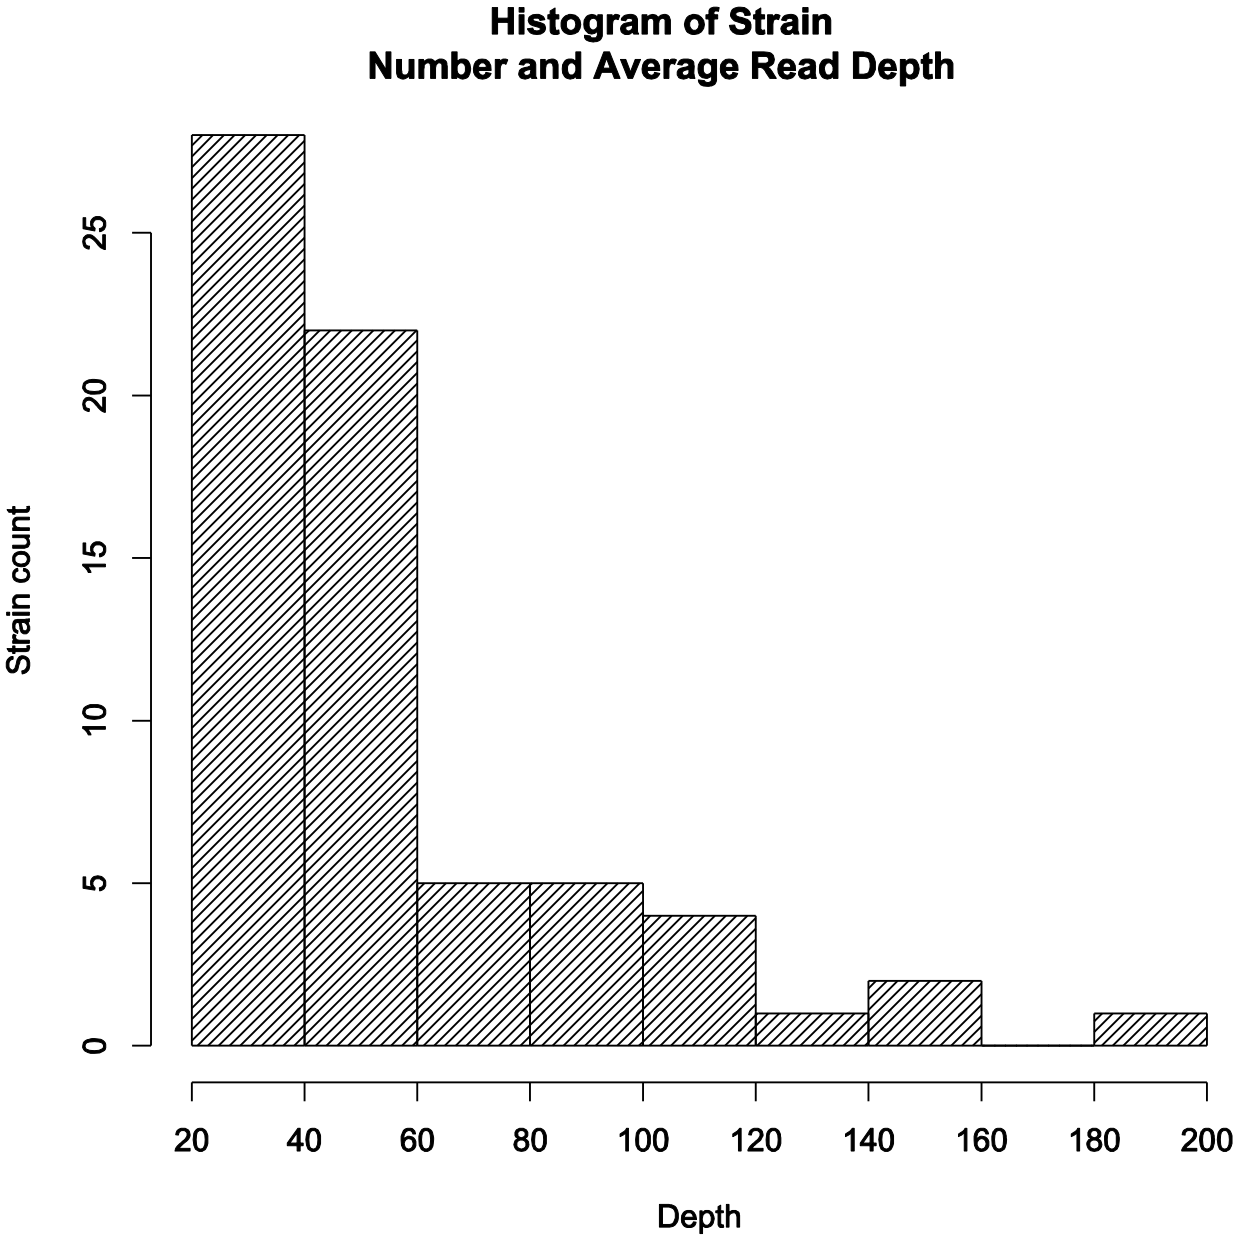

**Supplementary Figure 5:** Frequency histogram of percentage of H37Rv reference bases that are covered by 20 or more reads.

**Histogram of Strain Number and Reference Genome Coverage at 20 Fold Read Depth**

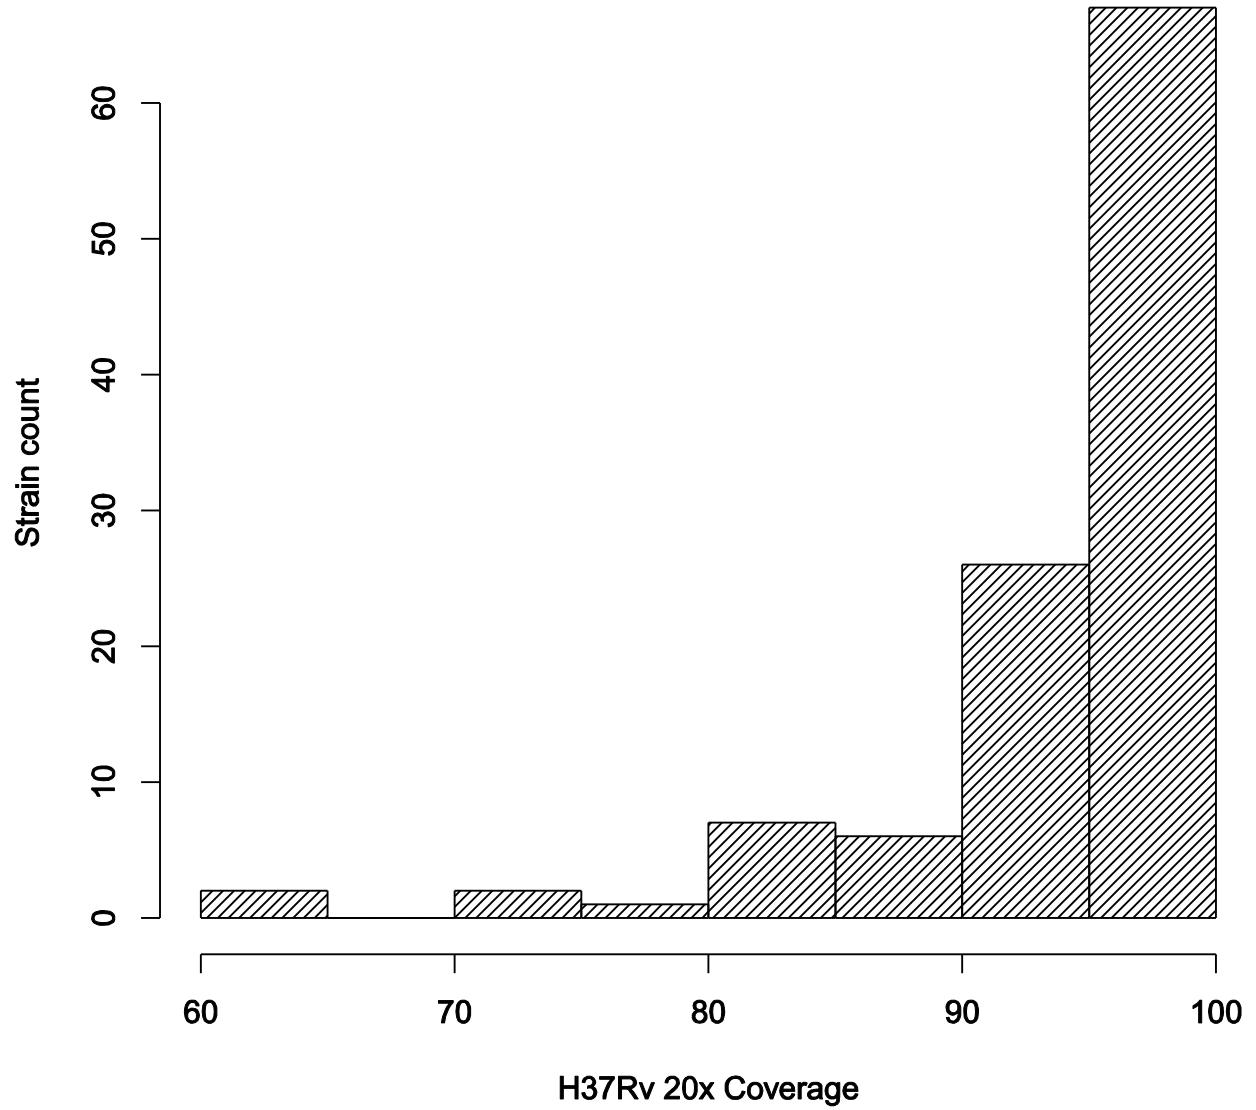

**Supplementary Figure 6:** Bar chart of the number of resistant isolates showing of distinct “genotype” showing changes in a genomic region with high spatial SNP clustering (Clustering index of  $\geq 5$ ). See supplementary notes for genotype definition.

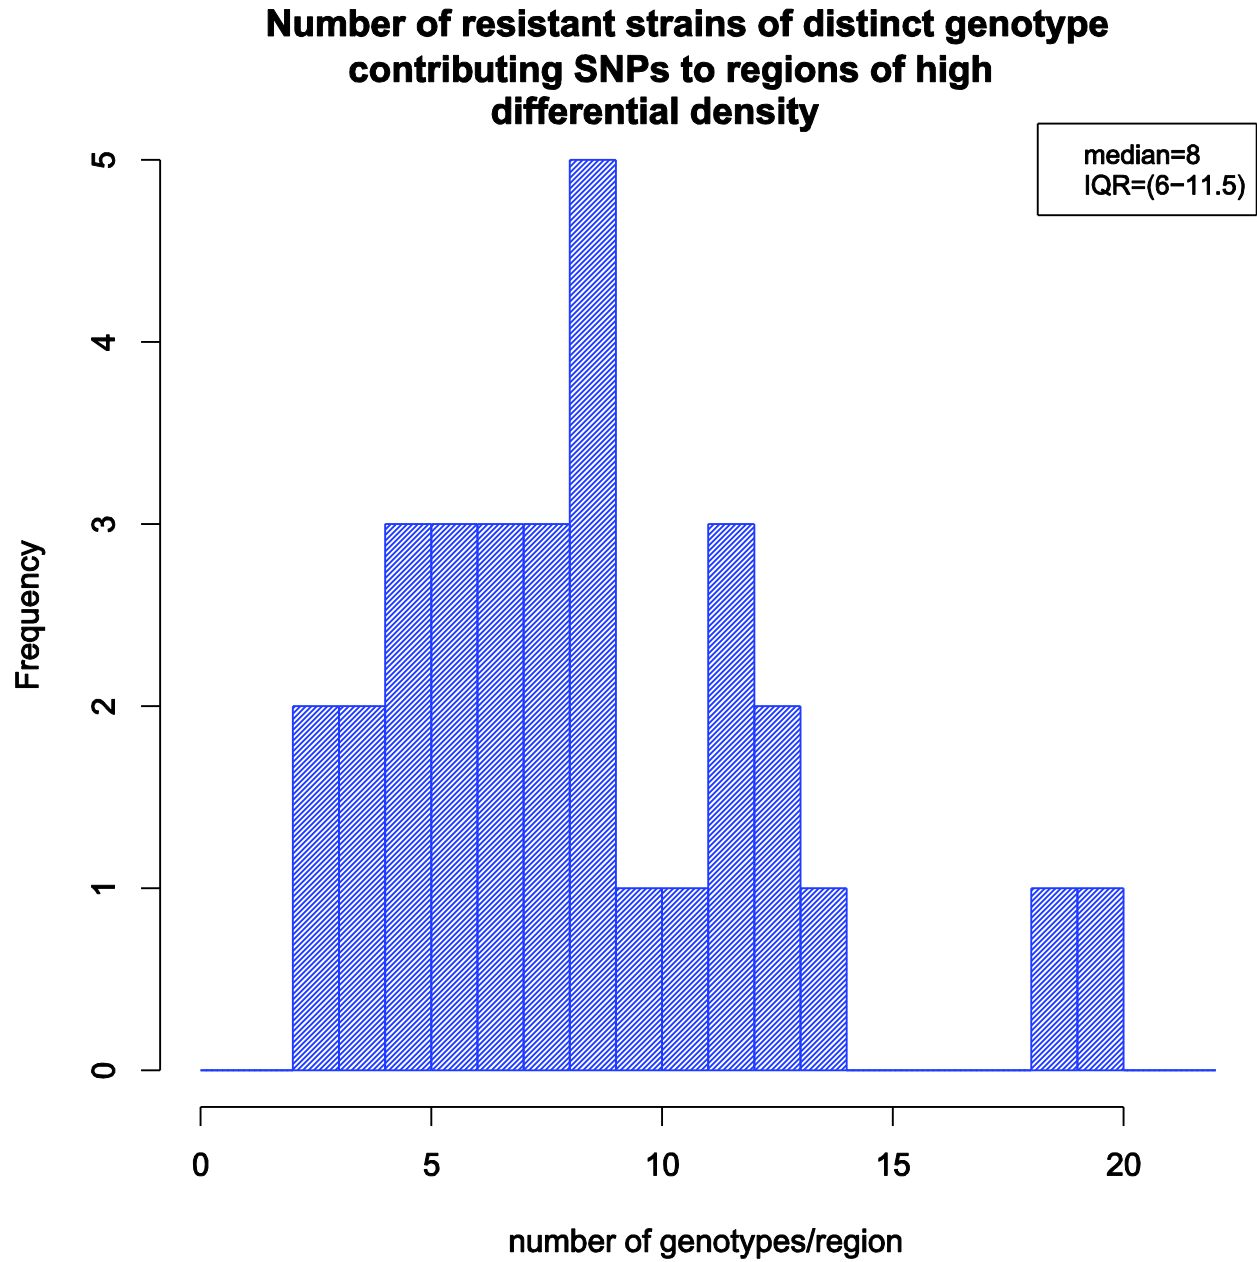



**Supplementary Figure 8:** Diagram demonstrating SNP calling in the PPE60 H37Rv sequence. Displayed are Illumina sequencing reads (represented by grey bars) mapping with high quality (MAQ mapping quality >50) from 03R0888 strain to the 3,893,377-3,897,699 genomic region surrounding and containing PPE60 (coordinates 3,894,425-3,895,607). Colored lines (any color but grey) within the bars represent bases mismatched to the reference (H37Rv) sequence. When the number of high quality reads containing a mismatched base at a particular site is  $\geq 20$  the mapping algorithm may call a SNP at this position. The height of the blue bars in the '36mer Redundancy' track denotes the number of times a 36mer in this region has been observed elsewhere in the H37Rv genome and is used here as a measure of “repetitiveness”. The diagram shows that the SNP present in 03R0888 in PPE60 does not occur in a repetitive region.

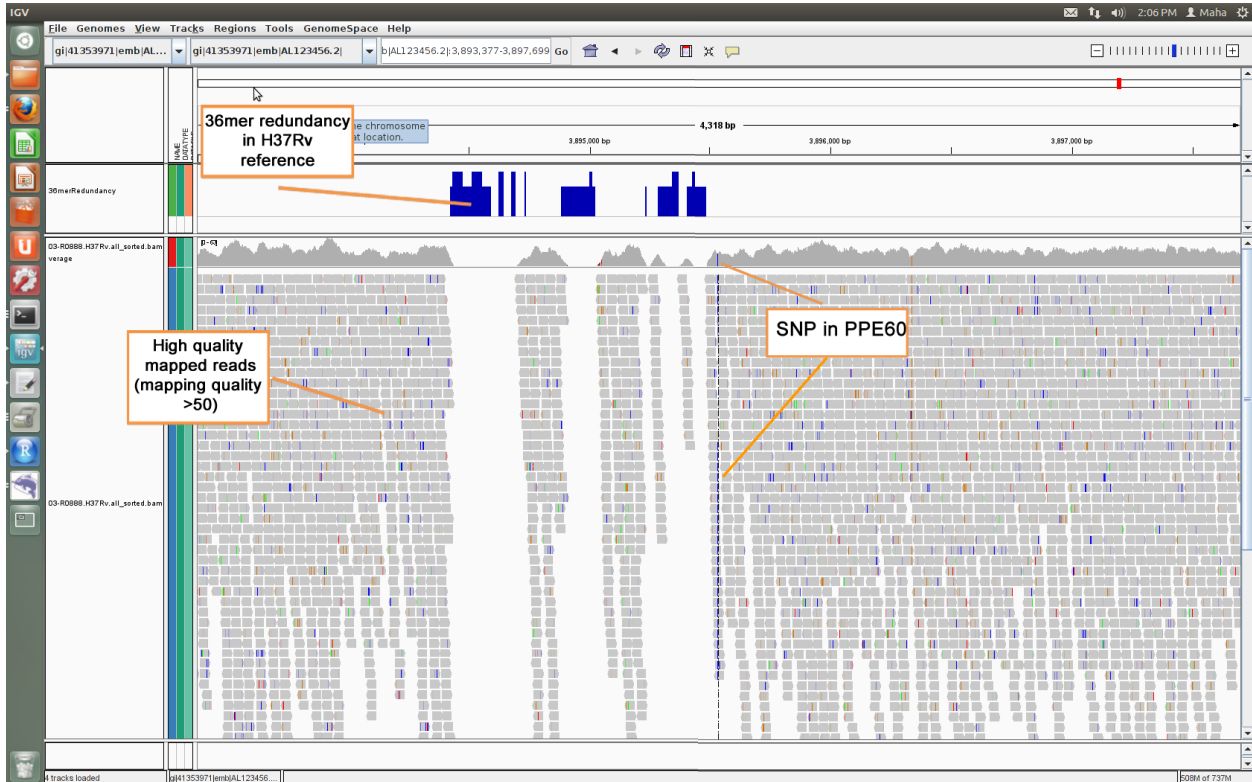



**Supplementary Table 1:** Percentage of resistance not explained by either WGS or ultra-deep sequencing with molecular inversion probes (1 insertion in *pncA* codon 152 detected by molecular inversion probes verification was also included).

| Drug <sup>ψ</sup> | Isolates Resistant | Unexplained <sup>‡</sup> | Genes Considered (includes their promoter regions) <sup>†</sup> | Comments                                                                                       |
|-------------------|--------------------|--------------------------|-----------------------------------------------------------------|------------------------------------------------------------------------------------------------|
| INH               | 36                 | 1(3%)                    | <i>katG*</i> , <i>inhA</i> , <i>fabG1(mabA)</i>                 | All isolate with <i>fabG1</i> mutations also had either <i>katG</i> or <i>inhA</i> mutation(s) |
| RIF               | 38                 | 1(3%)                    | <i>rpoB</i>                                                     |                                                                                                |
| EMB               | 24                 | 0(0%)                    | <i>embB</i> , <i>embC</i>                                       | Two isolates only had <i>embC</i> mutation(s)                                                  |
| PZA               | 21                 | 3(15%)                   | <i>pncA</i> , <i>rpsA</i>                                       | All isolates with <i>rpsA</i> mutations also had <i>pncA</i> mutation(s)                       |
| SM                | 29                 | 0(0%)                    | <i>rpsL</i> , <i>rrs</i> , <i>gidB</i>                          |                                                                                                |
| ETH               | 20                 | 3(15%)                   | <i>ethA</i> , <i>inhA</i> , <i>fabG1(mabA)</i>                  |                                                                                                |
| OFLX              | 6                  | 1(17%)                   | <i>gyrA**</i> , <i>gyrB</i>                                     |                                                                                                |
| CIP               | 3                  | 2(67%)                   | <i>gyrA**</i> , <i>gyrB</i>                                     |                                                                                                |
| LEVO              | 1                  | 0(0%)                    | <i>gyrA**</i> , <i>gyrB</i>                                     |                                                                                                |
| AMK               | 4                  | 0(0%)                    | <i>rrs</i> , <i>eis</i> , <i>rhl</i>                            |                                                                                                |
| CAP               | 6                  | 1(17%)                   | <i>rrs</i> , <i>tlyA</i> , <i>eis</i>                           |                                                                                                |
| KAN               | 18                 | 6(33%)                   | <i>rrs</i> , <i>eis</i> , <i>rhl</i>                            |                                                                                                |
| PAS               | 3                  | 0(0%)                    | <i>thyA</i>                                                     |                                                                                                |

<sup>ψ</sup>INH: isoniazid, RIF: rifampicin, EMB: ethambutol, STR: streptomycin, PZA: pyrazinamide, ETH: ethionamide, KAN: kanamycin, CAP: capreomycin, AMK: amikacin, OFLX: ofloxacin, LEVO: levofloxacin, CIP: ciprofloxacin, PAS: para-aminosalicylic acid, CYS: cycloserine. <sup>‡</sup> A few strains had unexplained resistance to more than one drug. Supplementary Table 8 details strains and drug type. <sup>†</sup>Excludes the common non-resistance associated polymorphisms \**katG* R463L \*\**gyrA* E21Q, S95T, G247S, G668D

**Supplementary Table 2:** Significant genes by the dN/dS method with known drug resistance genes listed first, and other genes second, both in increasing *p*-value.

| Rvnumber | Symbol       | Drug ‡ | Description                                            | <i>P</i> -value (<1.25E-5) † | Significant site(s)                                                                  | Site class dN/dS ψ |
|----------|--------------|--------|--------------------------------------------------------|------------------------------|--------------------------------------------------------------------------------------|--------------------|
| Rv0667   | <i>rpoB</i>  | RIF    | DNA-directed RNA polymerase beta chain                 | 1.06E-27                     | 435 D 1.000**, 445 H 0.982*, 450 L 1.000**, 452 L 0.983*, 491 I 0.980*, 731 L 0.983* | 199                |
| Rv3795   | <i>embB</i>  | EMB    | membrane indolylacetylinsitol arabinosyltransferase    | 4.28E-23                     | 306 I 1.000**, 354 D 0.995**, 406 G 0.995**                                          | 999                |
| Rv0006   | <i>gyrA</i>  | FLQ    | DNA gyrase subunit A                                   | 6.93E-15                     | 90 A 0.999**, 94 A 1.000**, 95 T 1.000**, 292 R 0.979*, 376 R 0.980*, 668 D 1.000**  | 999                |
| Rv1908c  | <i>katG</i>  | INH    | catalase-peroxidase-peroxynitritase T                  | 5.98E-06                     | 315 T 0.979*                                                                         | 724                |
| Rv3919c  | <i>gid</i>   | STR    | glucose-inhibited division protein B                   | 1.25E-05                     | 92 E 0.973*, 96 R 0.992**, 145 L 0.992**                                             | 141                |
| Rv0746   | PE_PGRS9     |        | PE-PGRS family protein                                 | 1.04E-35                     | 191 G 1.000**, 252 A 0.997**, 280 D 1.000**, 320 A 1.000**, 445 A 1.000**            | 236                |
| Rv0279c  | PE_PGRS4     |        | PE-PGRS family protein                                 | 7.36E-28                     | 77 V 1.000**, 325 N 0.995**, 352 G 1.000**, 372 I 0.995**                            | 134                |
| Rv0532   | PE_PGRS6     |        | PE-PGRS family protein                                 | 1.18E-25                     | 227 D 0.980*, 239 G 1.000**                                                          | 999                |
| Rv2931   | <i>ppsA</i>  |        | phenolphthiocerol synthesis type-I polyketide synthase | 2.85E-24                     | 624 D 1.000**, 803 A 0.980*, 1194 L 0.990**                                          | 826                |
| Rv0747   | PE_PGRS10    |        | PE-PGRS family protein                                 | 2.51E-23                     | 295 K 1.000**, 300 S 1.000**                                                         | 146                |
| Rv1753c  | PPE24        |        | PPE family protein                                     | 5.97E-20                     | 488 T 1.000**                                                                        | 999                |
| Rv2853   | PE_PGRS48    |        | PE-PGRS family protein                                 | 3.32E-19                     | 180 G 1.000**                                                                        | 999                |
| Rv3512   | PE_PGRS56    |        | PE-PGRS family protein                                 | 3.67E-19                     | 253 A 1.000**, 306 I 0.988*                                                          | 999                |
| Rv0050   | <i>ponA1</i> |        | bifunctional penicillin-binding protein                | 6.95E-18                     | 631 P 1.000**                                                                        | 999                |
| Rv0218   |              |        | conserved membrane protein                             | 3.46E-17                     | 316 R 1.000**                                                                        | 999                |
| Rv2024c  |              |        | conserved hypothetical protein                         | 5.48E-17                     | 47 R 0.997**, 154 G 1.000**                                                          | 513                |
| Rv1446c  | <i>opca</i>  |        | oxpp cycle protein                                     | 1.33E-16                     | 192 R 1.000**                                                                        | 999                |
| Rv2079   |              |        | conserved hypothetical protein                         | 6.35E-15                     | 47 C 1.000**, 95 L 0.977*                                                            | 999                |
| Rv2828c  |              |        | conserved hypothetical protein                         | 9.39E-15                     | 128 S 1.000**                                                                        | 999                |
| Rv0018c  | <i>ppp</i>   |        | serine/threonine phosphatase                           | 9.94E-15                     | 463 S 1.000**                                                                        | 999                |

|         |               |                                                |          |                              |     |
|---------|---------------|------------------------------------------------|----------|------------------------------|-----|
| Rv0058  | <i>dnaB</i>   | replicative DNA helicase                       | 1.53E-14 | 552 R 1.000**                | 999 |
| Rv0388c | PPE9          | PPE family protein                             | 2.39E-14 | 138 A 1.000**, 139 Q 1.000** | 52  |
| Rv2874  | <i>dipZ</i>   | cytochrome C biogenesis protein                | 1.10E-13 | 672 D 0.998**                | 999 |
| Rv2668  |               | exported alanine and valine rich protein       | 2.09E-13 | 3 R 1.000**                  | 999 |
| Rv0292  |               | conserved membrane protein                     | 2.43E-13 | 217 D 1.000**                | 999 |
| Rv0280  | PPE3          | PPE family protein                             | 2.43E-13 | 337 S 1.000**                | 999 |
| Rv0658c |               | conserved membrane protein                     | 3.47E-13 | 75 P 1.000**                 | 999 |
| Rv3077  |               | hydrolase                                      | 5.10E-13 | 310 G 1.000**                | 197 |
| Rv0236c |               | conserved membrane protein                     | 7.54E-13 | 1080 G 1.000**               | 310 |
| Rv2584c | <i>apt</i>    | adenine phosphoribosyltransferase              | 8.07E-13 | 147 E 1.000**                | 999 |
| Rv1394c | <i>cyp132</i> | cytochrome P450 132                            | 9.51E-13 | 135 L 1.000**                | 999 |
| Rv2917  |               | conserved alanine and arginine rich protein    | 1.12E-12 | 594 L 1.000**                | 999 |
| Rv0278c | PE_PGRS3      | PE-PGRS family protein                         | 1.68E-12 | 807 G 1.000**                | 324 |
| Rv2896c |               | conserved hypothetical protein                 | 2.02E-12 | 153 A 1.000**                | 999 |
| Rv2450c | <i>rpfE</i>   | resuscitation-promoting factor                 | 2.33E-12 | 20 T 0.992**, 126 R 1.000**  | 999 |
| Rv1812c |               | dehydrogenase                                  | 2.38E-12 | 30 P 0.998**                 | 999 |
| Rv2155c | <i>murD</i>   | UDP-N-acetylmuramoylalanine-D-glutamate ligase | 4.03E-12 | 247 G 0.999**                | 999 |
| Rv3711c | <i>dnaQ</i>   | DNA polymerase III epsilon subunit             | 5.24E-12 | 211 L 1.000**                | 999 |
| Rv3366  | <i>spoU</i>   | tRNA/rRNA methylase                            | 1.11E-11 | 92 R 1.000**                 | 999 |
| Rv2082  |               | conserved hypothetical protein                 | 1.34E-11 | 638 R 0.996**                | 209 |
| Rv0159c | PE3           | PE family protein                              | 2.38E-11 | 14 A 1.000**                 | 999 |
| Rv0064  |               | conserved membrane protein                     | 2.93E-11 | 457 D 0.982*, 906 R 1.000**  | 378 |
| Rv3468c |               | dTDP-glucose-4,6-dehydratase                   | 3.58E-11 | 62 V 1.000**                 | 999 |
| Rv3479  |               | transmembrane protein                          | 6.12E-11 | 174 R 0.991**                | 475 |
| Rv2825c |               | conserved hypothetical protein                 | 6.33E-11 | 162 S 0.998**                | 999 |
| Rv3490  | <i>otsA</i>   | alpha, alpha-trehalose-phosphate synthase      | 6.85E-11 | 77 E 0.958*                  | 999 |
| Rv2090  |               | 5-3 exonuclease                                | 1.76E-10 | 358 F 0.999**                | 999 |
| Rv0964c |               | hypothetical protein                           | 4.18E-10 | 124 T 0.999**                | 999 |
| Rv1093  | <i>glyA1</i>  | serine hydroxymethyltransferase 1              | 1.02E-09 | 36 A 0.990*                  | 999 |

|         |              |                                                                   |          |                              |     |
|---------|--------------|-------------------------------------------------------------------|----------|------------------------------|-----|
| Rv2490c | PE_PGRS43    | PE-PGRS family protein                                            | 1.40E-09 | 1399 G 0.996**               | 999 |
| Rv1971  | <i>mce3F</i> | MCE-family protein                                                | 1.54E-09 | 396 E 1.000**                | 999 |
| Rv0082  |              | oxidoreductase                                                    | 1.89E-09 | 74 R 0.986*                  | 999 |
| Rv3776  |              | conserved hypothetical protein                                    | 1.91E-09 | 112 S 0.983*, 329 V 0.996**  | 484 |
| Rv2947c | <i>pks15</i> | polyketide synthase                                               | 2.69E-09 | 333 A 0.999**                | 999 |
| Rv2439c | <i>proB</i>  | glutamate 5-kinase protein                                        | 2.81E-09 | 226 S 0.993**                | 999 |
| Rv2458  | <i>mmuM</i>  | homocysteine S-methyltransferase                                  | 3.38E-09 | 125 Y 0.998**                | 999 |
| Rv3245c | <i>mtrB</i>  | two component system sensor histidine kinase                      | 3.39E-09 | 18 P 0.999**, 517 L 0.984*   | 875 |
| Rv3151  | <i>nuoG</i>  | NADH dehydrogenase I chain G                                      | 4.66E-09 | 474 M 0.989*                 | 999 |
| Rv2488c |              | transcriptional regulator, luxR-family                            | 6.02E-09 | 265 T 0.997**                | 999 |
| Rv3449  | <i>mycP4</i> | membrane-anchored mycosin                                         | 6.57E-09 | 87 T 0.995**                 | 999 |
| Rv0192  |              | conserved hypothetical protein                                    | 6.73E-09 | 127 P 0.998**                | 999 |
| Rv0095c |              | conserved hypothetical protein                                    | 8.31E-09 | 57 D 1.000**                 | 999 |
| Rv3835  |              | conserved membrane protein                                        | 1.01E-08 | 294 L 0.996**                | 999 |
| Rv1704c | <i>cycA</i>  | D-serine/alanine/glycine transporter protein                      | 1.01E-08 | 93 L 0.994**                 | 999 |
| Rv2794c |              | conserved hypothetical protein                                    | 1.08E-08 | 87 V 0.997**                 | 999 |
| Rv1320c |              | adenylate cyclase                                                 | 1.26E-08 | 531 A 0.996**                | 999 |
| Rv1463  |              | ABC transporter ATP-binding protein                               | 1.59E-08 | 198 E 0.992**                | 999 |
| Rv1895  |              | dehydrogenase                                                     | 1.66E-08 | 270 L 0.995**                | 999 |
| Rv2770c | PPE44        | PPE family protein                                                | 1.68E-08 | 194 F 0.995**                | 999 |
| Rv2059  |              | conserved hypothetical protein                                    | 1.81E-08 | 317 T 0.990**                | 999 |
| Rv2567  |              | conserved alanine and leucine rich protein                        | 1.85E-08 | 645 Q 0.992**                | 999 |
| Rv1378c |              | conserved hypothetical protein                                    | 1.92E-08 | 37 W 0.994**                 | 999 |
| Rv0194  |              | drugs-transport transmembrane ATP-binding protein ABC transporter | 3.06E-08 | 74 T 0.994**                 | 999 |
| Rv2333c |              | conserved membrane transport protein                              | 4.79E-08 | 69 Y 0.994**                 | 999 |
| Rv0338c |              | iron-sulfur-binding reductase                                     | 5.71E-08 | 506 G 0.992**, 621 V 0.992** | 999 |
| Rv0881  |              | rRNA methyltransferase                                            | 6.06E-08 | 115 R 0.999**                | 634 |
| Rv0417  | <i>thiG</i>  | thiamin biosynthesis protein                                      | 6.77E-08 | 75 C 0.998**                 | 343 |

|         |              |                                                   |             |                                 |     |
|---------|--------------|---------------------------------------------------|-------------|---------------------------------|-----|
| Rv0109  | PE_PGRS1     | PE-PGRS family protein                            | 8.68E-08    | 346 G 0.995**                   | 999 |
| Rv3425  | PPE57        | PPE family protein                                | 1.07E-07    | 63 L 0.972*, 128 T<br>0.999**   | 999 |
| Rv3093c |              | oxidoreductase                                    | 1.31E-07    | 210 C 0.995**                   | 999 |
| Rv1319c |              | adenylate cyclase                                 | 1.46E-07    | 439 D 0.995**                   | 235 |
| Rv2101  | <i>helZ</i>  | helicase                                          | 1.63E-07    | 462 L 0.986*                    | 330 |
| Rv2017  |              | transcriptional regulator                         | 1.92E-07    | 262 E 0.993**                   | 999 |
| Rv2769c | PE27         | PE family protein                                 | 2.19E-07    | 136 A 0.978*, 270 M<br>0.999**  | 999 |
| Rv1186c |              | conserved hypothetical protein                    | 2.30E-07    | 207 A 0.988*                    | 999 |
| Rv2741  | PE_PGRS47    | PE-PGRS family protein                            | 2.79E-07    | 271 S 0.999**                   | 80  |
| Rv2495c | <i>pdhC</i>  | dihydrolipoamide S-acetyltransferase E2 component | 3.30E-07    | 107 A 0.997**                   | 696 |
| Rv3777  |              | oxidoreductase                                    | 3.50E-07    | 160 A 0.999**                   | 999 |
| Rv0048c |              | membrane protein                                  | 3.67E-07    | 248 E 0.992**, 250 V<br>0.992** | 999 |
| Rv3341  | <i>metA</i>  | homoserine O-acetyltransferase                    | 4.12E-07    | 87 S 0.950                      | 999 |
| Rv3511  | PE_PGRS55    | PE-PGRS family protein                            | 4.14E-07    | 396 N 0.987*, 589 G<br>0.991**  | 503 |
| Rv1716  |              | conserved hypothetical protein                    | 4.19E-07    | 178 G 0.977*, 276 A<br>0.975*   | 999 |
| Rv0226c |              | conserved membrane protein                        | 4.34E-07    | 379 P 0.962*                    | 999 |
| Rv0995  | <i>rimJ</i>  | ribosomal-protein-alanine acetyltransferase       | 4.34E-07    | 23 G 0.997**, 105 Y<br>0.978*   | 999 |
| Rv0465c |              | transcriptional regulator                         | 4.49E-07    | 106 C 0.994**                   | 999 |
| Rv1644  | <i>tsnR</i>  | 23S rRNA methyltransferase                        | 5.38E-07    | 232 P 0.994**                   | 999 |
| Rv3764c |              | two component system sensor kinase                | 6.42164E-07 | 246 R 0.961*                    | 999 |
| Rv1915  | <i>aceAa</i> | isocitrate lyase                                  | 6.78E-07    | 179 D 0.995**                   | 999 |
| Rv2807  |              | conserved hypothetical protein                    | 8.84E-07    | 72 E 0.998**, 77 D<br>0.988*    | 999 |
| Rv2236c | <i>cobD</i>  | cobalamin biosynthesis transmembrane protein      | 9.86E-07    | 79 C 0.991**                    | 744 |
| Rv0787  |              | hypothetical protein                              | 1.05E-06    | 267 H 0.991**                   | 802 |
| Rv1618  | <i>tesB1</i> | acyl-CoA thioesterase II                          | 1.07E-06    | 121 L 0.995**                   | 999 |
| Rv0425c | <i>ctpH</i>  | metal cation transporting P-type ATPase           | 1.13E-06    | 689 V 0.982*                    | 398 |
| Rv1326c | <i>glgB</i>  | 1,4-alpha-glucan branching enzyme                 | 1.22E-06    | 470 S 0.908                     | 999 |
| Rv0572c |              | hypothetical protein                              | 1.28E-06    | 31 L 0.989*                     | 999 |
| Rv1640c | <i>lysS</i>  | lysyl-tRNA synthetase 2 lysX                      | 1.36E-06    | 701 I 0.942                     | 999 |
| Rv3063  | <i>cstA</i>  | carbon starvation protein A                       | 1.45E-06    | 559 S 0.929                     | 999 |

|         |              |                                                             |          |                              |     |
|---------|--------------|-------------------------------------------------------------|----------|------------------------------|-----|
| Rv3782  |              | L-rhamnosyltransferase                                      | 1.66E-06 | 274 V 0.992**                | 999 |
| Rv3021c | PPE47        | PPE family protein                                          | 2.26E-06 | 222 A 0.952*                 | 64  |
| Rv2433c |              | hypothetical protein                                        | 2.29E-06 | 26 L 0.998**                 | 999 |
| Rv2316  | <i>uspA</i>  | sugar-transport membrane protein ABC transporter            | 2.38E-06 | 67 D 0.996**, 127 L 0.974*   | 999 |
| Rv1232c |              | conserved hypothetical protein                              | 2.53E-06 | 149 G 0.981*                 | 483 |
| Rv0103c | <i>ctpB</i>  | cation-transporter P-type ATPase B                          | 3.02E-06 | 22 S 0.981*                  | 999 |
| Rv2611c |              | acyltransferase                                             | 3.22E-06 | 197 C 0.979*                 | 999 |
| Rv0676c | <i>mmpL5</i> | transmembrane transport protein                             | 3.27E-06 | 948 V 0.934                  | 999 |
| Rv1160  | <i>mutT2</i> | mutator protein mutT                                        | 3.46E-06 | 58 G 0.969*                  | 999 |
| Rv3879c |              | hypothetical alanine and proline rich protein               | 3.68E-06 | 729 S 0.980*                 | 269 |
| Rv1321  |              | conserved hypothetical protein                              | 3.69E-06 | 144 R 0.997**                | 999 |
| Rv3497c | <i>mce4C</i> | MCE-family protein                                          | 4.09E-06 | 191 R 0.928                  | 999 |
| Rv1486c |              | conserved hypothetical protein                              | 4.17E-06 | 198 N 0.972*                 | 999 |
| Rv3365c |              | conserved hypothetical protein                              | 4.20E-06 | 38 P 0.989*, 687 S 0.953*    | 999 |
| Rv1127c | <i>ppdK</i>  | pyruvate, phosphate dikinase                                | 4.92E-06 | 69 E 0.899                   | 999 |
| Rv1400c | <i>lipI</i>  | lipase lipH                                                 | 5.04E-06 | 106 T 0.989*                 | 999 |
| Rv3892c | PPE69        | PPE family protein                                          | 5.65E-06 | 19 K 0.962*                  | 999 |
| Rv3655c |              | conserved hypothetical protein                              | 6.23E-06 | 100 S 0.979*                 | 119 |
| Rv0557  | <i>pimB</i>  | mannosyltransferase                                         | 6.32E-06 | none                         | 1   |
| Rv3144c | PPE52        | PPE family protein                                          | 6.42E-06 | 226 S 0.969*                 | 999 |
| Rv0758  | <i>phoR</i>  | two component system sensor kinase                          | 7.11E-06 | 172 L 0.980*                 | 999 |
| Rv1538c | <i>ansA</i>  | L-aporaginase                                               | 7.79E-06 | 281 G 0.985*                 | 999 |
| Rv2290  | <i>lppO</i>  | lipoprotein                                                 | 8.61E-06 | 16 A 0.986*                  | 999 |
| Rv0855  | <i>far</i>   | fatty-acid-CoA racemase                                     | 8.78E-06 | 24 A 0.993**                 | 342 |
| Rv3737  |              | conserved membrane protein                                  | 9.15E-06 | 40 G 0.853                   | 999 |
| Rv2037c |              | conserved membrane protein                                  | 9.16E-06 | 312 Y 0.914                  | 999 |
| Rv3282  | <i>maf</i>   | conserved hypothetical protein                              | 9.30E-06 | 80 A 0.988*                  | 999 |
| Rv1300  | <i>hemK</i>  | hypothetical protein                                        | 9.49E-06 | 194 C 0.988*                 | 999 |
| Rv3317  | <i>sdhD</i>  | succinate dehydrogenase hydrophobic membrane anchor subunit | 1.00E-05 | 112 T 0.998**, 114 R 0.990** | 999 |
| Rv3347c | PPE55        | PPE family protein                                          | 1.07E-05 | 786 V 0.781                  | 1   |
| Rv3591c |              | hydrolase                                                   | 1.07E-05 | 156 F 0.986*                 | 999 |

|         |              |                                        |          |                                                                                        |     |
|---------|--------------|----------------------------------------|----------|----------------------------------------------------------------------------------------|-----|
| Rv0668  | <i>rpoC</i>  | DNA-directed RNA polymerase beta chain | 1.13E-05 | 404 D 0.975*, 484 W 0.975*, 698 N 0.998**, 1040 P 0.976*, 1092 E 0.988*, 1231 R 0.976* | 999 |
| Rv3329  |              | aminotransferase                       | 1.16E-05 | 122 H 0.969*                                                                           | 999 |
| Rv1900c | <i>lipJ</i>  | lignin peroxidase                      | 1.19E-05 | 204 M 0.946                                                                            | 999 |
| Rv0538  |              | conserved membrane protein             | 1.21E-05 | 228 P 0.960*                                                                           | 999 |
| Rv2482c | <i>plsB2</i> | glycerol-3-phosphate acyltransferase   | 1.22E-05 | 778 R 0.956*                                                                           | 999 |

‡ Mutations in the specified gene are previously known to be associated with resistance to the drug listed. Abbreviations detailed in Supplementary Table 1 footnote. †p-value is 0.05 corrected for the multiple testing (3998 tests) to a threshold of 1.25062E-5. Significant sites are determined by PAML Bayesian empiric Bayes method with thresholds of \* <0.05, and \*\*<0.01. ψ Site class dN/dS is the dN/dS deduced by the alternative model likelihood model allowing for selection in 2/4 different site categories (40).

**Supplementary Table 3:** Pairwise convergence analysis: SNPs found in two or more resistant isolates relative to the more sensitive ancestor.

| SNP        | Region              | Symbol       | Drug* | # pairs | Isolates        | p-value              |
|------------|---------------------|--------------|-------|---------|-----------------|----------------------|
| 2155168 CG | Rv1908c             | <i>katG</i>  | INH   | 4       | 32, 16, 22, 141 | 2x10 <sup>-17</sup>  |
| 781687 AG  | Rv0682              | <i>rpsL</i>  | STR   | 3       | 32, 141, 13     | 1 x10 <sup>-12</sup> |
| 761155 CT  | Rv0667              | <i>rpoB</i>  | RIF   | 2       | 32, 13          | 4 x 10 <sup>-8</sup> |
| 761161 TC  | Rv0667              | <i>rpoB</i>  | RIF   | 2       | 16,141          | 4 x 10 <sup>-8</sup> |
| 4247429 AG | Rv3795              | <i>embB</i>  | EMB   | 2       | 16, 37          | 4 x 10 <sup>-8</sup> |
| 55553 CT   | Rv0050              | <i>ponA1</i> | .     | 2       | 37, 13          | 4 x 10 <sup>-8</sup> |
| 2163375 TC | Rv1917c             | PPE34        | .     | 2       | 37, 13          | 4 x 10 <sup>-8</sup> |
| 1468208 AC | Rv1313c             | .            | .     | 2       | 37, 13          | 4 x 10 <sup>-8</sup> |
| 4254290 TG | Rv3798              | .            | .     | 2       | 37, 13          | 4 x 10 <sup>-8</sup> |
| 921813 CG  | Rv0829              | .            | .     | 2       | 37, 13          | 4 x 10 <sup>-8</sup> |
| 3131473 AC | Rv2823c             | .            | .     | 2       | 16, 37          | 4 x 10 <sup>-8</sup> |
| 2715346 GA | <i>eis</i> promoter | .            | .     | 2       | 41, 22          | 4 x 10 <sup>-8</sup> |

\*Drug abbreviations explained in Supplementary Table 1.



**Supplementary Table 4:** Pairwise convergence analysis: Genes with two or more new R specific SNPs

| Gene                             | symbol       | Drug* | convergent R isolates # | isolate ids             | SNPs                                                                                      | p-value             |
|----------------------------------|--------------|-------|-------------------------|-------------------------|-------------------------------------------------------------------------------------------|---------------------|
| Rv0667                           | <i>rpoB</i>  | RIF   | 6                       | 32, 13, 16, 37, 22, 141 | 761161TC (L452P), 761155CT (S450L), 761110AG (D435G), 763123TC (I1106T), 761253CT (P483S) | 6 x10 <sup>-9</sup> |
| Rv3795                           | <i>embB</i>  | EMB   | 5                       | 32, 16, 37, 141, 13     | 4247431GA (M306I), 4247429AG (M306V), 4248002CA (Q497K), 428003AG (Q497R)                 | 5 x10 <sup>-7</sup> |
| Rv1908c                          | <i>katG</i>  | INH   | 5                       | 32, 16, 22, 141, 13     | 2155168CG (S315T), 2155412CT (G234R)                                                      | 5 x10 <sup>-7</sup> |
| Rv2043c                          | <i>pncA</i>  | PZA   | 4                       | 32, 22, 141, 13         | 2289072TC (H57R), 2288730GA (A171V), 2288848CT (G132S), 2288885CT (W119*)                 | 3 x10 <sup>-5</sup> |
| Rv0682                           | <i>rpsL</i>  | STR   | 3                       | 32, 141, 13             | 781687AG (K43R)                                                                           | 0.002               |
| Rv3347c                          | PPE55        | -     | 3                       | 37, 42, 141             | 3750828AG (V786A), 3752821TC (M122V), 3750421TC (S922G)                                   | 0.002               |
| Rv0746                           | PE_PGRS9     | -     | 3                       | 37, 41, 22              | 838858AG (T320A), 837033AG (T445A), 836454AG (T252A)                                      | 0.002               |
| Rvnr01                           | <i>rrs</i>   | SM/AG | 2                       | 16, 22                  | 1473246AG, 1472751AG                                                                      | 0.064               |
| Rv0006                           | <i>gyrA</i>  | FLQ   | 2                       | 32, 16                  | 7582AC(D94A), 7570CT(A90V)                                                                | 0.064               |
| Rv3854c                          | <i>ethA</i>  | ETH   | 2                       | 32, 37                  | 4326630AC(F282V), 4327065AG(C137R)                                                        | 0.064               |
| <i>eis</i> promoter              | -            | KAN   | 2                       | 41, 22                  | 2715346GA                                                                                 | 0.064               |
| Rv2813-<br>Rv2814c<br>intergenic | -            | -     | 2                       | 32, 37                  | 3119188TC, 3119957TG                                                                      | 0.064               |
| Rv2048c                          | <i>pks12</i> | -     | 2                       | 37, 141                 | 2304238AG(S917P), 2295685CA (V3768L)                                                      | 0.064               |
| Rv0279c                          | PE_PGRS4     | -     | 2                       | 41, 22                  | 338844AG+338845CT (V77T), 338020AC (C352G)                                                | 0.064               |
| Rv3478                           | PPE60        | -     | 2                       | 37, 42                  | 3894732AG(R103G), 3894784CT(T120M)                                                        | 0.064               |
| Rv2931                           | <i>ppsA</i>  | -     | 2                       | 42, 13                  | 3247851GA(A803T), 3249411GA(G1323S)                                                       | 0.064               |
| Rv1917c                          | PPE34        | -     | 2                       | 37, 13                  | 2163375TC (N1313D)                                                                        | 0.064               |
| Rv0050                           | <i>ponA1</i> | -     | 2                       | 37, 13                  | 55553CT (P631S)                                                                           | 0.064               |
| Rv0747                           | PE_PGRS10    | -     | 2                       | 41, 42                  | 839123AG(R225G), 839334AG(K295R), 839348AG(S300G)                                         | 0.064               |

|         |   |   |   |        |                                                         |       |
|---------|---|---|---|--------|---------------------------------------------------------|-------|
| Rv2611c | - | - | 2 | 22,141 | 2939373GC(S197C), 2939374AG(C197G),<br>2939657TC(I102M) | 0.064 |
| Rv1313c | - | - | 2 | 37,13  | 1468208AC (L433R)                                       | 0.064 |
| Rv0064  | - | - | 2 | 37,22  | 69989GA(G457D), 71336GC(R906P)                          | 0.064 |
| Rv3798  | - | - | 2 | 37,13  | 4254290TG (L433R)                                       | 0.064 |
| Rv3365c | - | - | 2 | 37,141 | 3775409TC(Q698R), 3777389GA(P38L)                       | 0.064 |
| Rv0492c | - | - | 2 | 32,37  | 583171AC(S70A), 581890CG(V497L)                         | 0.064 |
| Rv3806c | - | - | 2 | 32,16  | 4269271AG(V188A), 4269671CG(V55L)                       | 0.064 |
| Rv2823c | - | - | 2 | 16,37  | 3131473AC (Y101D)                                       | 0.064 |
| Rv0829  | - | - | 2 | 37,13  | 921813CG (A80G)                                         | 0.064 |

**\*Drug abbreviations explained in Supplementary Table 1.**

**Supplementary Table 5:** Significant genomic regions/TIMs by phyC (phylogenetic convergence). Known resistance regions listed first. Regions ordered by increasing p-value.

| Gene/<br>Region                                 | Drug** | Description                                                                                                 | Convergence p-<br>value (<0.05)† | Resistant<br>branches*** | Sensitive<br>branches *** | Convergent<br>Site(s) |
|-------------------------------------------------|--------|-------------------------------------------------------------------------------------------------------------|----------------------------------|--------------------------|---------------------------|-----------------------|
| <i>katG</i>                                     | INH    | catalase-peroxidase-<br>peroxynitritase                                                                     | <0.0001                          | 13                       | 5                         |                       |
| <i>pncA</i>                                     | PZA    | pyrazinamidase/nicotineamideda<br>se                                                                        | <0.0001                          | 13                       | 0                         |                       |
| <i>embB</i>                                     | EMB    | membrane indolylacetylinositol<br>arabinosyltransferase                                                     | 0.003, <0.0001*                  | 20                       | 7                         | 916G                  |
| <i>ethA</i>                                     | ETH    | Monooxygenase                                                                                               | 0.0001                           | 10                       | 4                         |                       |
| <i>gyrA</i>                                     | FLQ    | DNA gyrase subunit A                                                                                        | 0.0003                           | 11                       | 12                        |                       |
| <i>inhA</i><br>promoter                         | INH    | NADH-dependent enoyl-[acyl-<br>carrier-protein] reductase<br>promoter                                       | 0.011                            | 6                        | 1                         |                       |
| <i>eis</i><br>promoter                          | KAN    | Enhanced intracellular survival<br>protein promoter                                                         | 0.0021                           | 6                        | 0                         |                       |
| <i>rpoB</i>                                     | RIF    | DNA-direction RNA polymerase<br>beta chain                                                                  | <0.0001, 0.0001,<br><0.0001*     | 26                       | 3                         | 1304T,<br>1349T       |
| <i>gid</i>                                      | SM     | glucose-inhibited division protein<br>B                                                                     | 0.0002                           | 12                       | 7                         |                       |
| <i>rpsL</i>                                     | SM     | 30S ribosomal protein S12                                                                                   | 0.0016, 0.0008*                  | 11                       | 0                         | 128G                  |
| <i>rrs</i>                                      | SM/AG  | 16S ribosomal RNA                                                                                           | 0.0044,<br><0.0001*              | 12                       | 3                         | 1401G                 |
| Rv0218                                          |        | conserved membrane protein                                                                                  | <0.0001,<br>0.0001*              | 11                       | 5                         | 946T                  |
| PE_PGRS4                                        |        | PE-PGRS family protein                                                                                      | <0.0001                          | 20                       | 23                        |                       |
| PE_PGRS6                                        |        | PE-PGRS family protein                                                                                      | <0.0001                          | 18                       | 16                        |                       |
| PE_PGRS9                                        |        | PE-PGRS family protein                                                                                      | <0.0001                          | 28                       | 23                        |                       |
| PPE9                                            |        | PPE family protein                                                                                          | <0.0001                          | 22                       | 21                        |                       |
| <i>ppsA</i>                                     |        | phenolphthiocerol synthesis type-I<br>polyketide synthase                                                   | <0.0001                          | 23                       | 21                        |                       |
| Rv0064                                          |        | conserved membrane protein                                                                                  | <0.0001                          | 19                       | 18                        |                       |
| Rv2082                                          |        | conserved hypothetical protein                                                                              | <0.0001                          | 20                       | 18                        |                       |
| PE_PGRS1<br>0                                   |        | PE-PGRS family protein                                                                                      | <0.0001                          | 19                       | 17                        |                       |
| PPE55                                           |        | PPE family protein                                                                                          | <0.0001                          | 16                       | 24                        |                       |
| PE_PGRS3                                        |        | PE-PGRS family protein                                                                                      | 0.0003                           | 15                       | 18                        |                       |
| <i>ponA1</i>                                    |        | bifunctional penicillin-binding<br>protein                                                                  | 0.0005                           | 12                       | 10                        |                       |
| Rv3680-<br><i>whib4</i><br>intergenic<br>region |        | Intergenic area between anion<br>transporter ATPase (Rv3680) and<br>transcriptional regulator whib-<br>like | 0.0005                           | 12                       | 9                         |                       |
| <i>pks12</i>                                    |        | hypothetical protein                                                                                        | 0.0006                           | 13                       | 17                        |                       |
| PE_PGRS1                                        |        | PE-PGRS family protein                                                                                      | <0.0001,<br>0.0006*              | 11                       | 13                        | 1036C                 |
| Rv3093c                                         |        | Oxidoreductase                                                                                              | 0.0009                           | 9                        | 5                         |                       |
| <i>rpoC</i>                                     |        | DNA-directed RNA polymerase<br>beta chain                                                                   | 0.0011                           | 10                       | 6                         |                       |
| <i>pks3</i>                                     |        | polyketide beta-ketoacyl synthase                                                                           | 0.0011                           | 7                        | 10                        |                       |
| <i>opcA</i>                                     |        | oxpp cycle protein                                                                                          | 0.0015                           | 10                       | 8                         |                       |

|                                            |                                                                                       |                  |    |    |       |
|--------------------------------------------|---------------------------------------------------------------------------------------|------------------|----|----|-------|
| <i>rbsK</i>                                | Ribokinase                                                                            | 0.0018           | 10 | 9  |       |
| PPE54                                      | PPE family protein                                                                    | 0.0022           | 16 | 28 |       |
| Rv1319c                                    | Possible adenylate cyclase                                                            | 0.0032           | 9  | 7  |       |
| Rv3446c                                    | hypothetical alanine and valine rich protein                                          | 0.0039           | 9  | 5  |       |
| PPE3                                       | PPE family protein                                                                    | 0.0039, 0.0028*  | 13 | 12 | 1009T |
| Rv2896c                                    | conserved hypothetical protein                                                        | <0.0001, 0.0053* | 9  | 8  | 457T  |
| Rv2024c                                    | conserved hypothetical protein                                                        | 0.0066           | 12 | 13 |       |
| PE_PGRS48                                  | PE-PGRS family protein                                                                | 0.0068, 0.0006*  | 14 | 6  | 538C  |
| <i>mtrB</i>                                | two component system sensor histidine kinase                                          | 0.0069           | 8  | 4  |       |
| Rv0658c                                    | conserved membrane protein                                                            | 0.0013, 0.0072*  | 10 | 11 | 224T  |
| <i>murD</i>                                | UDP-N-acetylmuramoylalanine-D-glutamate ligase                                        | 0.0075, 0.0001*  | 15 | 8  | 739C  |
| Rv1147-Rv1148c intergenic region           | intergenic area or possible promoter between two conserved hypothetical protein       | 0.0075, 0.0092*  | 8  | 7  | 408C  |
| PE_PGRS50                                  | PE-PGRS family protein                                                                | 0.0077           | 9  | 4  |       |
| PPE47                                      | PPE family protein                                                                    | 0.0101           | 10 | 15 |       |
| <i>dnaQ</i>                                | DNA polymerase III epsilon subunit                                                    | 0.0126           | 7  | 9  |       |
| PE_PGRS47                                  | PE-PGRS family protein                                                                | 0.0143           | 8  | 8  |       |
| <i>coaE</i> -Rv1632c intergenic region     | intergenic area, ? Promoter of hypothetical protein, preceded by dephospho-CoA kinase | 0.0152           | 8  | 5  |       |
| PPE60                                      | PPE family protein                                                                    | 0.0184           | 9  | 5  |       |
| PE_PGRS53                                  | PE-PGRS family protein                                                                | 0.0224           | 8  | 13 |       |
| <i>murA</i> - <i>rrs</i> intergenic region | Probable rrs, rrl, rrf promoter                                                       | 0.0328, 0.0112*  | 6  | 1  | 83C   |

† Average p-value over all replicates of trees (ml, Bayesian, parsimony, and ml and parsimony reconstructions, site had to be significant by all replicate trees/reconstructions to be considered significant) \* Significant by both nucleotide site and gene analysis, p-values for all significant sites/ and gene analysis listed, in order site1, (site2), gene. \*\* Mutations in the specified gene are previously known to be associated with resistance to the drug listed. Abbreviations detailed in Supplementary Table 1 footnote. AG aminoglycosides (kanamycin, capreomycin, amikacin) \*\*\* these counts represent the number of parsimony phylogenetic branches with one or more changes anywhere along the gene or intergenic region, all changes were treated equal. The tree contained a total of 87 resistant branches and 158 sensitive branches.

**Supplementary Table 6: Significant genomic regions by the differential density method**

| Gene/Region                                | Drug* | Description                                            | p-value**<br>(<0.05)/(CI>5) |
|--------------------------------------------|-------|--------------------------------------------------------|-----------------------------|
| <i>pncA</i>                                | PZA   | pyrazinamidase/nicotinamidase                          | <0.0001                     |
| <i>embB</i>                                | EMB   | membrane indolylacetylinsitol arabinosyltransferase    | <0.0001                     |
| <i>rrs</i>                                 | SM/AG | 16S ribosomal RNA                                      | <0.0001                     |
| <i>rpoB</i>                                | RIF   | DNA-direction RNA polymerase beta chain                | <0.0001                     |
| <i>ethA</i>                                | ETH   | monooxygenase                                          | 0.036                       |
| <i>rpsL</i>                                | SM    | 30S ribosomal protein S12                              | 0.036                       |
| <i>katG</i>                                | INH   | catalase-peroxidase-peroxynitritase                    | 0.0441 (CI=8)               |
| <i>gyrA</i>                                | FLQ   | DNA gyrase subunit A                                   | 0.0675 (CI=5)               |
| <i>eis</i> promoter                        | KAN   | Enhanced intracellular survival protein promoter       | 0.2567 (CI=6)               |
| <i>gid</i>                                 | SM    | glucose-inhibited division protein B                   | 0.4901 (CI=5)               |
| PE_PGRS9                                   |       | PE-PGRS family protein                                 | 0.0026                      |
| <i>ppsA</i>                                |       | phenolphthiocerol synthesis type-I polyketide synthase | 0.01                        |
| Rv0218                                     |       | conserved membrane protein                             | 0.1229 (CI=7)               |
| <i>rpoC</i>                                |       | DNA-directed RNA polymerase beta chain                 | 0.4901 (CI=5)               |
| Rv2024c                                    |       | conserved hypothetical protein                         | 0.1085 (CI=6)               |
| PE_PGRS48                                  |       | PE-PGRS family protein                                 | 0.0133                      |
| <i>murD</i>                                |       | UDP-N-acetylmuramoylalanine-D-glutamate ligase         | 0.2143 (CI=6)               |
| PE_PGRS16                                  |       | PE-PGRS family protein                                 | 0.0338                      |
| Rv0236c                                    |       | Conserved membrane protein                             | 0.051 (CI=7)                |
| PE_PGRS56                                  |       | PE-PGRS family protein                                 | 0.051 (CI=7)                |
| PE_PGRS24                                  |       | PE-PGRS family protein                                 | 0.3041 (CI=6)               |
| <i>pksI</i>                                |       | Polyketide synthase                                    | 0.4901 (CI=5)               |
| Rv0192                                     |       | Conserved hypothetical protein                         | 0.7048 (CI=5)               |
| <i>rimJ</i>                                |       | Ribosomal-protein-alanine acetyltransferase            | 0.7048 (CI=5)               |
| Rv2828c                                    |       | Conserved hypothetical protein                         | 0.7436 (CI=5)               |
| Rv3468c                                    |       | dTDP-glucose-4,6-dehydratase                           | 0.7436 (CI=5)               |
| Rv0749A-<br>Rv0750<br>intergenic<br>region |       | Flanking genes are conserved hypothetical proteins     | 0.7378 (CI=5)               |
| <i>fadD36</i>                              |       | Fatty-acid-CoA ligase                                  | 0.7378 (CI=5)               |
| PE_PGRS26                                  |       | PE-PGRS family protein                                 | 0.7378 (CI=5)               |

\* Mutations in the specified gene are previously known to be associated with resistance to the drug listed. Abbreviations detailed in Supplementary Table 1 footnote. AG aminoglycosides (kanamycin, capreomycin, amikacin) \*\*Regions and p-values highlighted in orange or yellow are also detected by phyC. Regions are displayed if they have an empirical p-value of <0.05 (orange highlight) or a clustering index (CI, see text)  $\geq 5$  (yellow highlight).

**Supplementary Table 7:** Genes significant by two or more of the three following methods: phyC, dN/dS and differential density.

| <b>Rvnumber</b>    | <b>Symbol</b> | <b>Description</b>                                     | <b>Method</b>                          |
|--------------------|---------------|--------------------------------------------------------|----------------------------------------|
| <b>Known genes</b> |               |                                                        |                                        |
| <b>Rv0667</b>      | <i>rpoB</i>   | DNA-direction RNA polymerase beta chain                | All                                    |
| <b>Rv1908c</b>     | <i>katG</i>   | catalase-oxidase-peroxynitritase                       | All                                    |
| <b>Rv0006</b>      | <i>gyrA</i>   | DNA gyrase subunit A                                   | All                                    |
| <b>Rv3919</b>      | <i>gid</i>    | glucose-inhibited division protein B                   | All                                    |
| <b>Rv3795</b>      | <i>embB</i>   | membrane indolylacetyl-inositol arabinosyltransferase  | All                                    |
| <b>Rv3854c</b>     | <i>ethA</i>   | monooxygenase                                          | phyC + differential density            |
| <b>Rv0682</b>      | <i>rpsL</i>   | 30S ribosomal protein S12                              | phyC + differential density            |
| <b>Rv2043c</b>     | <i>pncA</i>   | pyrazinamidase/nicotinamidase                          | phyC + differential density            |
| <b>Rvnr01</b>      | <i>rrs</i>    | 16S ribosomal RNA                                      | phyC + differential density            |
| <b>Rv2416c</b>     | <i>eis</i>    | Enhanced intracellular survival protein                | phyC + differential density (promoter) |
| <b>Rv1484</b>      | <i>inhA</i>   | NADH-dependent enoyl-[acyl-carrier-protein] reductase  | phyC + differential density (promoter) |
| <b>Other genes</b> |               |                                                        |                                        |
| <b>Rv0218</b>      |               | conserved membrane protein                             | All                                    |
| <b>Rv0668</b>      | <i>rpoC</i>   | DNA-directed RNA polymerase beta chain                 | All                                    |
| <b>Rv0746</b>      | PE_PGRS9      | PE-PGRS family protein                                 | All                                    |
| <b>Rv2155c</b>     | <i>murD</i>   | UDP-N-acetylmuramoylalanine-D-glutamate ligase         | All                                    |
| <b>Rv2931</b>      | <i>ppsA</i>   | phenolphthiocerol synthesis type-I polyketide synthase | All                                    |
| <b>Rv2024c</b>     |               | conserved hypothetical protein                         | All                                    |
| <b>Rv2853</b>      | PE_PGRS48     | PE-PGRS family protein                                 | All                                    |
| <b>Rv0236c</b>     |               | conserved membrane protein                             | dN/dS + differential density           |
| <b>Rv3512</b>      | PE_PGRS56     | PE-PGRS family protein                                 | dN/dS + differential density           |
| <b>Rv0192</b>      |               | conserved hypothetical protein                         | dN/dS + differential density           |
| <b>Rv0995</b>      | <i>rimJ</i>   | ribosomal-protein-alanine acetyltransferase            | dN/dS + differential density           |
| <b>Rv2828c</b>     |               | conserved hypothetical protein                         | dN/dS + differential density           |
| <b>Rv3468c</b>     |               | dTDP-glucose-4,6-dehydratase                           | dN/dS + differential density           |
| <b>Rv0050</b>      | <i>ponA1</i>  | bifunctional penicillin-binding protein                | dN/dS + phyC                           |

|                |             |                                              |              |
|----------------|-------------|----------------------------------------------|--------------|
| <b>Rv0064</b>  |             | conserved membrane protein                   | dN/dS + phyC |
| <b>Rv0109</b>  | PE_PGRS1    | PE-PGRS family protein                       | dN/dS + phyC |
| <b>Rv0278c</b> | PE_PGRS3    | PE-PGRS family protein                       | dN/dS + phyC |
| <b>Rv0279c</b> | PE_PGRS4    | PE-PGRS family protein                       | dN/dS + phyC |
| <b>Rv0280</b>  | PPE3        | PPE family protein                           | dN/dS + phyC |
| <b>Rv0388c</b> | PPE9        | PPE family protein                           | dN/dS + phyC |
| <b>Rv0532</b>  | PE_PGRS6    | PE-PGRS family protein                       | dN/dS + phyC |
| <b>Rv0658c</b> |             | conserved membrane protein                   | dN/dS + phyC |
| <b>Rv0747</b>  | PE_PGRS10   | PE-PGRS family protein                       | dN/dS + phyC |
| <b>Rv1319c</b> |             | adenylate cyclase                            | dN/dS + phyC |
| <b>Rv1446c</b> | <i>opcA</i> | oxpp cycle protein                           | dN/dS + phyC |
| <b>Rv2082</b>  |             | conserved hypothetical protein               | dN/dS + phyC |
| <b>Rv2741</b>  | PE_PGRS47   | PE-PGRS family protein                       | dN/dS + phyC |
| <b>Rv2896c</b> |             | conserved hypothetical protein               | dN/dS + phyC |
| <b>Rv3021c</b> | PPE47       | PPE family protein                           | dN/dS + phyC |
| <b>Rv3093c</b> |             | Oxidoreductase                               | dN/dS + phyC |
| <b>Rv3245c</b> | <i>mtrB</i> | two component system sensor histidine kinase | dN/dS + phyC |
| <b>Rv3347c</b> | PPE55       | PPE family protein                           | dN/dS + phyC |
| <b>Rv3711c</b> | <i>dnaQ</i> | DNA polymerase III epsilon subunit           | dN/dS + phyC |

**Supplementary Table 8:** Amino acid (AA) substitutions in TIMs for strains with unexplained resistance. Substitutions that also occurred in isolates sensitive to the respective drug were excluded. Substitutions are named relative to the reference H37Rv amino-acid sequence.

| Drug*      | Isolate | Epicluster | Nonsynonymous or noncoding SNPs                                                                        |
|------------|---------|------------|--------------------------------------------------------------------------------------------------------|
| INH        | M213    | -          | <i>pks12</i> Q3283R                                                                                    |
| RIF        | M213    | -          | <i>pks12</i> Q3283R                                                                                    |
| PZA        | R439    | SA2        | <i>rpoC</i> E750D, <i>PPE54</i> A2181V & F2182L, <i>PPE55</i> Q1766R, Rv1319c G457R                    |
|            | R451    | SA2        | <i>rpoC</i> E750D, <i>PPE54</i> A2181V & F2182L, <i>PPE55</i> Q1766R, <i>PPE60</i> G146A, Rv2082 A185P |
|            | CDC607  | -          | PE_PGERS9 V118A                                                                                        |
| ETH        | M213    | -          | <i>pks12</i> Q3283R, <i>rpoC</i> P1040R                                                                |
|            | M200    | -          | -                                                                                                      |
|            | 02R1848 | Peru1      | -                                                                                                      |
| OFLX       | M230    | -          | -                                                                                                      |
| CIP        | 03R1082 | Russia2    | -                                                                                                      |
|            | 04R0292 | Peru1      | -                                                                                                      |
| KAN        | M213    | -          | <i>pks12</i> Q3283R                                                                                    |
|            | CDC602  | CDC2       | <i>ppsA</i> H955P, <i>PPE60</i> T120M                                                                  |
| KAN<br>CAP | 03R0303 | Peru1      | <i>mtrB</i> G174A                                                                                      |
|            | M41     | Mine       | -                                                                                                      |
|            | 03R0888 | Russia1    | <i>PPE60</i> S371R                                                                                     |
|            | 03R1082 | Russia2    | -                                                                                                      |
|            | 03R1082 | Russia2    | -                                                                                                      |

\* Drug abbreviations expanded in Supplementary Table 1 footnote.



**Supplementary Table 9:** Synonymous mutations significant by a secondary application of PhyC. Permutation based significance levels were determined using the dataset of all mutations synonymous, nonsynonymous and non-coding.

| Gene/<br>Region | Description                    | Convergence p-<br>value (<0.05)** | Resistant<br>branches*** | Sensitive<br>branches*** | Convergent<br>Site(s) |
|-----------------|--------------------------------|-----------------------------------|--------------------------|--------------------------|-----------------------|
| <i>pks12</i>    | Polyketide synthase 12         | 0.02                              | 8                        | 4                        | 6750T                 |
| Rv2205c         | Conserved hypothetical protein | 0.001                             | 8                        | 5                        | 315A                  |
| Rv0236c         | Conserved membrane protein     | 0.001                             | 8                        | 1                        | 981T                  |
| Rv3228          | Conserved hypothetical protein | 0.01                              | 6                        | 2                        | 96G                   |
| PE_PGRS4*       | PE_PGRS family protein         | 0.0009, 0.02                      | 6,6                      | 0,2                      | 171G, 621T            |
| PE_PGRS9        | PE_PGRS family protein         | 0.002                             | 8                        | 4                        | 591G                  |
| PPE32           | PPE family protein             | 0.004                             | 6                        | 1                        | 993A                  |
| PE_PGRS7        | PE_PGRS family protein         | 0.007                             | 6                        | 1                        | 3426G                 |

\* Two sites within PE\_PGRS4 were significant, the p-values, and number of branches for the two significant sites are listed in order of sites listed in 6<sup>th</sup> column. \*\* average p-value over all replicates of trees (ml, Bayesian, parsimony, and ml and parsimony reconstructions, site had to be significant by all replicate trees/reconstructions to be considered significant) \*\*\*these counts represent the number of parsimony phylogenetic branches with one or more changes anywhere along the gene or intergenic region, all changes were treated equal. The tree contained a total of 87 resistant branches and 158 sensitive branches.

**Supplementary Table 10:** Genes significant by each of phyC, dN/dS, and differential density for rifampicin resistance in increasing order of p-value. In bold and underlined are genes previously associated with resistance to rifampicin.

| <b>Phylogenetic Convergence</b> |                      |                    |                                                        |                                                                                                               |                            |
|---------------------------------|----------------------|--------------------|--------------------------------------------------------|---------------------------------------------------------------------------------------------------------------|----------------------------|
| Number                          | Rv-number            | Symbol             | Description                                            | P-value (<0.05) *Site & Gene convergence. ** Site convergence only (p-values ordered by site1, (site2), gene) | Convergent site(s)         |
| <b>1</b>                        | <b><u>Rv0667</u></b> | <b><u>rpoB</u></b> | <b><u>DNA-directed RNA polymerase beta chain</u></b>   | <b><u>0, 0.0017, 0.0075*</u></b>                                                                              | <b><u>1349T, 1304T</u></b> |
| 2                               | Rv0682               | rpsL               | 30S ribosomal protein S12                              | <0.0001, 0.0017*                                                                                              | 128G                       |
| 3                               | Rv3795               | embB               | membrane indolylacetylinoitol arabinosyltransferase    | <0.0001, 0.0386*                                                                                              | 916G                       |
| 4                               | Rv2043c              | pncA               | pyrazinamidase/nicotinamidase                          | <0.0001                                                                                                       |                            |
| 5                               | Rv0746               | PE_PGRS9           | PE-PGRS family protein                                 | 0.0004                                                                                                        |                            |
| 6                               | Rv2896c              |                    | conserved hypothetical protein                         | 0.0075**                                                                                                      | 457T                       |
| 7                               | Rv2853               | PE_PGRS48          | PE-PGRS family protein                                 | 0.0089                                                                                                        |                            |
| 8                               | Rvnr01               | rrs                | ribosomal RNA 16S                                      | 0.0115                                                                                                        |                            |
| 9                               | Rv0064               |                    | conserved membrane protein                             | 0.0122                                                                                                        |                            |
| 10                              | Rv0236c              |                    | conserved membrane protein                             | 0.014                                                                                                         |                            |
| 11                              | Rv2931               | ppsA               | phenolphthiocerol synthesis type-I polyketide synthase | 0.0164                                                                                                        |                            |
| 12                              | Rv0388c              | PPE9               | PPE family protein                                     | 0.0164                                                                                                        |                            |
| 13                              | Rv1908c              | katG               | catalase-peroxidase-peroxynitritase T                  | 0.0244                                                                                                        |                            |
| 14                              | Rv3919c              | gid                | glucose-inhibited division protein B                   | 0.0244                                                                                                        |                            |
| 15                              | Rv2082               |                    | conserved hypothetical protein                         | 0.0269                                                                                                        |                            |
| 16                              | Rv2155c              | murD               | UDP-N-acetylmuramoylalanine-D-glutamate ligase         | 0.0279                                                                                                        |                            |
| 17                              | Rv0218               |                    | conserved membrane protein                             | 0.0326**                                                                                                      | 946T                       |
| 18                              | Rv0050               | ponA1              | bifunctional penicillin-binding protein                | 0.0386**                                                                                                      | 1891C                      |
| 19                              | Rv3854c              | ethA               | monooxygenase                                          | 0.042                                                                                                         |                            |
| <b>Differential Density</b>     |                      |                    |                                                        |                                                                                                               |                            |
| Number                          | Rv-                  | Symbol             | Description                                            | P-value (<0.05)                                                                                               | Clustering Index           |

| r        | number               |                    |                                                        |                          |                  |
|----------|----------------------|--------------------|--------------------------------------------------------|--------------------------|------------------|
| 1        | Rv2043c              | <i>pncA</i>        | pyrazinamidase/nicotinamidase                          | <0.0001                  | 15               |
| <b>2</b> | <b><u>Rv0667</u></b> | <b><u>rpoB</u></b> | <b><u>DNA-directed RNA polymerase beta chain</u></b>   | <b><u>&lt;0.0001</u></b> | <b><u>32</u></b> |
| 3        | Rv3795               | <i>embB</i>        | membrane indolylacetylinsitol arabinosyltransferase    | <0.0001                  | 14               |
| 4        | Rvnr01               | <i>rrs</i>         | ribosomal RNA 16S                                      | <0.0001                  | 12               |
| 5        | Rv0977               | PE_PGRS16          | PE-PGRS family protein                                 | 0.0207                   | 8                |
| 6        | Rv3854c              | <i>ethA</i>        | monooxygenase                                          | 0.0219                   | 8                |
| 7        | Rv0236c              |                    | conserved membrane protein                             | 0.0291                   | 7                |
| 8        | Rv0006               | <i>gyrA</i>        | DNA gyrase subunit A                                   | 0.0345                   | 5                |
| 9        | Rv2931               | <i>ppsA</i>        | phenolphthiocerol synthesis type-1 polyketide synthase | 0.046                    | 4                |
| 10       | Rv2853               | PE_PGRS48          | PE-PGRS family protein                                 | 0.0497                   | 7                |
| 11       | Rv2024c              |                    | conserved hypothetical protein                         | 0.0666                   | 6                |
| 12       | Rv0682               | <i>rpsL</i>        | 30S ribosomal protein S12                              | 0.0837                   | 7                |
| 13       | Rv1908c              | <i>katG</i>        | catalase-peroxidase-peroxyxynitritase T                | 0.1842                   | 6                |
| 14       | Rv1325c              | PE_PGRS24          | PE-PGRS family protein                                 | 0.2183                   | 6                |
| 15       | Rv0668               | <i>rpoC</i>        | DNA-directed RNA polymerase beta chain                 | 0.3638                   | 5                |
| 16       | Rv2946c              | <i>pks1</i>        | polyketide synthase                                    | 0.3638                   | 5                |
| 17       | Rv3919c              | <i>gid</i>         | glucose-inhibited division protein B                   | 0.3638                   | 5                |
| 18       | Rv0218               |                    | conserved membrane protein                             | 0.4529                   | 5                |
| 19       | Rv0192               |                    | conserved hypothetical protein                         | 0.5719                   | 5                |
| 20       | Rv2828c              |                    | conserved hypothetical protein                         | 0.6208                   | 5                |
| 21       | Rv3468c              |                    | dTDP-glucose-4,6-dehydratase                           | 0.6208                   | 5                |
| 22       | Rv0988               |                    | hypothetical exported protein                          | 0.6262                   | 5                |
| 23       | Rv1193               | <i>fadD36</i>      | fatty-acid-CoA ligase                                  | 0.6262                   | 5                |

#### dN/dS

| Number | Rv-number | Symbol   | Description            | P-value (<1.25E-5) | Significant site(s) by Bayesian empiric bayes method * <0.05, ** <0.01 | Class dN/dS $\psi$ (Supplementary Table 7) |
|--------|-----------|----------|------------------------|--------------------|------------------------------------------------------------------------|--------------------------------------------|
| 1      | Rv0746    | PE_PGRS9 | PE-PGRS family protein | 1.04E-35           | 191 G 1.000**, 252 A 0.997**, 280 D                                    | 236                                        |

|    |                      |                    |                                                           |                        |                                                                                                                    |                   |
|----|----------------------|--------------------|-----------------------------------------------------------|------------------------|--------------------------------------------------------------------------------------------------------------------|-------------------|
|    |                      |                    |                                                           |                        | 1.000**, 320 A 1.000**,<br>445 A 1.000**                                                                           |                   |
| 2  | Rv0279c              | PE_PGRS4           | PE-PGRS family protein                                    | 7.36E-28               | 77 V 1.000**, 325 N<br>0.995**, 352 G 1.000**,<br>372 I 0.995**                                                    | 134               |
| 3  | <b><u>Rv0667</u></b> | <b><u>rpoB</u></b> | <b><u>DNA-directed RNA<br/>polymerase beta chain</u></b>  | <b><u>1.06E-27</u></b> | <b><u>435 D 1.000**, 445 H<br/>0.982*, 450 L<br/>1.000**, 452 L<br/>0.983*, 491 I 0.980*,<br/>731 L 0.983*</u></b> | <b><u>199</u></b> |
| 4  | Rv0532               | PE_PGRS6           | PE-PGRS family protein                                    | 1.18E-25               | 227 D 0.980*, 239 G<br>1.000**                                                                                     | 999               |
| 5  | Rv2931               | <i>ppsA</i>        | phenolphthiocerol synthesis<br>type-I polyketide synthase | 2.85E-24               | 624 D 1.000**, 803 A<br>0.980*, 1194 L 0.990**                                                                     | 826               |
| 6  | Rv0747               | PE_PGRS1<br>0      | PE-PGRS family protein                                    | 2.51E-23               | 295 K 1.000**, 300 S<br>1.000**                                                                                    | 146               |
| 7  | Rv3795               | <i>embB</i>        | membrane<br>indolylacetylinoitol<br>arabinosyltransferase | 4.28E-23               | 306 I 1.000**, 354 D<br>0.995**, 406 G 0.995**                                                                     | 999               |
| 8  | Rv1753c              | PPE24              | PPE family protein                                        | 5.97E-20               | 488 T 1.000**                                                                                                      | 999               |
| 9  | Rv2853               | PE_PGRS4<br>8      | PE-PGRS family protein                                    | 3.32E-19               | 180 G 1.000**                                                                                                      | 999               |
| 10 | Rv3512               | PE_PGRS5<br>6      | PE-PGRS family protein                                    | 3.67E-19               | 253 A 1.000**, 306 I<br>0.988*                                                                                     | 999               |
| 11 | Rv0050               | <i>ponA1</i>       | bifunctional penicillin-<br>binding protein               | 6.95E-18               | 631 P 1.000**                                                                                                      | 999               |
| 12 | Rv0218               |                    | conserved membrane<br>protein                             | 3.46E-17               | 316 R 1.000**                                                                                                      | 999               |
| 13 | Rv2024c              |                    | conserved hypothetical<br>protein                         | 5.48E-17               | 47 R 0.997**, 154 G<br>1.000**                                                                                     | 513               |
| 14 | Rv1446c              | <i>opcA</i>        | oxpp cycle protein                                        | 1.33E-16               | 192 R 1.000**                                                                                                      | 999               |
| 15 | Rv2079               |                    | conserved hypothetical<br>protein                         | 6.35E-15               | 47 C 1.000**, 95 L<br>0.977*                                                                                       | 999               |
| 16 | Rv0006               | <i>gyrA</i>        | DNA gyrase subunit A                                      | 6.93E-15               | 90 A 0.999**, 94 A<br>1.000**, 95 T 1.000**,<br>292 R 0.979*, 376 R<br>0.980*, 668 D 1.000**                       | 999               |
| 17 | Rv2828c              |                    | conserved hypothetical<br>protein                         | 9.39E-15               | 128 S 1.000**                                                                                                      | 999               |
| 18 | Rv0018c              | <i>ppp</i>         | serine/threonine<br>phosphatase                           | 9.94E-15               | 463 S 1.000**                                                                                                      | 999               |
| 19 | Rv0058               | <i>dnaB</i>        | replicative DNA helicase                                  | 1.53E-14               | 552 R 1.000**                                                                                                      | 999               |
| 20 | Rv0388c              | PPE9               | PPE family protein                                        | 2.39E-14               | 138 A 1.000**, 139 Q<br>1.000**                                                                                    | 52                |
| 21 | Rv2874               | <i>dipZ</i>        | cytochrome C biogenesis<br>protein                        | 1.10E-13               | 672 D 0.998**                                                                                                      | 999               |
| 22 | Rv2668               |                    | exported alanine and valine<br>rich protein               | 2.09E-13               | 3 R 1.000**                                                                                                        | 999               |
| 23 | Rv0292               |                    | conserved membrane<br>protein                             | 2.43E-13               | 217 D 1.000**                                                                                                      | 999               |
| 24 | Rv0280               | PPE3               | PPE family protein                                        | 2.43E-13               | 337 S 1.000**                                                                                                      | 999               |
| 25 | Rv0658c              |                    | conserved membrane<br>protein                             | 3.47E-13               | 75 P 1.000**                                                                                                       | 999               |

|    |         |               |                                                |          |                             |     |
|----|---------|---------------|------------------------------------------------|----------|-----------------------------|-----|
| 26 | Rv3077  |               | hydrolase                                      | 5.10E-13 | 310 G 1.000**               | 197 |
| 27 | Rv0236c |               | conserved membrane protein                     | 7.54E-13 | 1080 G 1.000**              | 310 |
| 28 | Rv2584c | <i>apt</i>    | adenine phosphoribosyltransferase              | 8.07E-13 | 147 E 1.000**               | 999 |
| 29 | Rv1394c | <i>cyp132</i> | cytochrome P450 132                            | 9.51E-13 | 135 L 1.000**               | 999 |
| 30 | Rv2917  |               | conserved alanine and arginine rich protein    | 1.12E-12 | 594 L 1.000**               | 999 |
| 31 | Rv0278c | PE_PGRS3      | PE-PGRS family protein                         | 1.68E-12 | 807 G 1.000**               | 324 |
| 32 | Rv2896c |               | conserved hypothetical protein                 | 2.02E-12 | 153 A 1.000**               | 999 |
| 33 | Rv2450c | <i>rpfE</i>   | resuscitation-promoting factor                 | 2.33E-12 | 20 T 0.992**, 126 R 1.000** | 999 |
| 34 | Rv1812c |               | dehydrogenase                                  | 2.38E-12 | 30 P 0.998**                | 999 |
| 35 | Rv2155c | <i>murD</i>   | UDP-N-acetylmuramoylalanine-D-glutamate ligase | 4.03E-12 | 247 G 0.999**               | 999 |
| 36 | Rv3711c | <i>dnaQ</i>   | DNA polymerase III epsilon subunit             | 5.24E-12 | 211 L 1.000**               | 999 |
| 37 | Rv3366  | <i>spoU</i>   | tRNA/rRNA methylase                            | 1.11E-11 | 92 R 1.000**                | 999 |
| 38 | Rv2082  |               | conserved hypothetical protein                 | 1.34E-11 | 638 R 0.996**               | 209 |
| 39 | Rv0159c | PE3           | PE family protein                              | 2.38E-11 | 14 A 1.000**                | 999 |
| 40 | Rv0064  |               | conserved membrane protein                     | 2.93E-11 | 457 D 0.982*, 906 R 1.000** | 378 |
| 41 | Rv3468c |               | dTDP-glucose-4,6-dehydratase                   | 3.58E-11 | 62 V 1.000**                | 999 |
| 42 | Rv3479  |               | transmembrane protein                          | 6.12E-11 | 174 R 0.991**               | 475 |
| 43 | Rv2825c |               | conserved hypothetical protein                 | 6.33E-11 | 162 S 0.998**               | 999 |
| 44 | Rv3490  | <i>otsA</i>   | alpha, alpha-trehalose-phosphate synthase      | 6.85E-11 | 77 E 0.958*                 | 999 |
| 45 | Rv2090  |               | 5-3 exonuclease                                | 1.76E-10 | 358 F 0.999**               | 999 |
| 46 | Rv0964c |               | hypothetical protein                           | 4.18E-10 | 124 T 0.999**               | 999 |
| 48 | Rv1093  | <i>glyA1</i>  | serine hydroxymethyltransferase 1              | 1.02E-09 | 36 A 0.990*                 | 999 |
| 50 | Rv2490c | PE_PGRS4_3    | PE-PGRS family protein                         | 1.40E-09 | 1399 G 0.996**              | 999 |
| 51 | Rv1971  | <i>mce3F</i>  | MCE-family protein                             | 1.54E-09 | 396 E 1.000**               | 999 |
| 52 | Rv0082  |               | oxidoreductase                                 | 1.89E-09 | 74 R 0.986*                 | 999 |
| 53 | Rv3776  |               | conserved hypothetical protein                 | 1.91E-09 | 112 S 0.983*, 329 V 0.996** | 484 |
| 54 | Rv2947c | <i>pks15</i>  | polyketide synthase                            | 2.69E-09 | 333 A 0.999**               | 999 |
| 55 | Rv2439c | <i>proB</i>   | glutamate 5-kinase protein                     | 2.81E-09 | 226 S 0.993**               | 999 |
| 56 | Rv2458  | <i>mmuM</i>   | homocysteine S-methyltransferase               | 3.38E-09 | 125 Y 0.998**               | 999 |
| 57 | Rv3245c | <i>mtrB</i>   | two component system sensor histidine kinase   | 3.39E-09 | 18 P 0.999**, 517 L 0.984*  | 875 |
| 58 | Rv3151  | <i>nuoG</i>   | NADH dehydrogenase I                           | 4.66E-09 | 474 M 0.989*                | 999 |

| chain G |         |               |                                                                   |          |                              |     |
|---------|---------|---------------|-------------------------------------------------------------------|----------|------------------------------|-----|
| 59      | Rv2488c |               | transcriptional regulator, luxR-family                            | 6.02E-09 | 265 T 0.997**                | 999 |
| 60      | Rv3449  | <i>mycP4</i>  | membrane-anchored mycosin                                         | 6.57E-09 | 87 T 0.995**                 | 999 |
| 61      | Rv0192  |               | conserved hypothetical protein                                    | 6.73E-09 | 127 P 0.998**                | 999 |
| 62      | Rv0095c |               | conserved hypothetical protein                                    | 8.31E-09 | 57 D 1.000**                 | 999 |
| 63      | Rv3835  |               | conserved membrane protein                                        | 1.01E-08 | 294 L 0.996**                | 999 |
| 64      | Rv1704c | <i>cycA</i>   | D-serine/alanine/glycine transporter protein                      | 1.01E-08 | 93 L 0.994**                 | 999 |
| 65      | Rv2794c |               | conserved hypothetical protein                                    | 1.08E-08 | 87 V 0.997**                 | 999 |
| 66      | Rv1320c |               | adenylate cyclase                                                 | 1.26E-08 | 531 A 0.996**                | 999 |
| 68      | Rv1463  |               | ABC transporter ATP-binding protein                               | 1.59E-08 | 198 E 0.992**                | 999 |
| 69      | Rv1895  |               | dehydrogenase                                                     | 1.66E-08 | 270 L 0.995**                | 999 |
| 70      | Rv2770c | PPE44         | PPE family protein                                                | 1.68E-08 | 194 F 0.995**                | 999 |
| 71      | Rv2059  |               | conserved hypothetical protein                                    | 1.81E-08 | 317 T 0.990**                | 999 |
| 72      | Rv2567  |               | conserved alanine and leucine rich protein                        | 1.85E-08 | 645 Q 0.992**                | 999 |
| 73      | Rv1378c |               | conserved hypothetical protein                                    | 1.92E-08 | 37 W 0.994**                 | 999 |
| 74      | Rv0194  |               | drugs-transport transmembrane ATP-binding protein ABC transporter | 3.06E-08 | 74 T 0.994**                 | 999 |
| 75      | Rv2333c |               | conserved membrane transport protein                              | 4.79E-08 | 69 Y 0.994**                 | 999 |
| 76      | Rv0338c |               | iron-sulfur-binding reductase                                     | 5.71E-08 | 506 G 0.992**, 621 V 0.992** | 999 |
| 77      | Rv0881  |               | rRNA methyltransferase                                            | 6.06E-08 | 115 R 0.999**                | 634 |
| 78      | Rv0417  | <i>thiG</i>   | thiamin biosynthesis protein                                      | 6.77E-08 | 75 C 0.998**                 | 343 |
| 79      | Rv0109  | PE_PGRS1      | PE-PGRS family protein                                            | 8.68E-08 | 346 G 0.995**                | 999 |
| 80      | Rv3425  | PPE57         | PPE family protein                                                | 1.07E-07 | 63 L 0.972*, 128 T 0.999**   | 999 |
| 82      | Rv3093c |               | oxidoreductase                                                    | 1.31E-07 | 210 C 0.995**                | 999 |
| 83      | Rv1319c |               | adenylate cyclase                                                 | 1.46E-07 | 439 D 0.995**                | 235 |
| 84      | Rv2101  | <i>helZ</i>   | helicase                                                          | 1.63E-07 | 462 L 0.986*                 | 330 |
| 85      | Rv2017  |               | transcriptional regulator                                         | 1.92E-07 | 262 E 0.993**                | 999 |
| 86      | Rv2769c | PE27          | PE family protein                                                 | 2.19E-07 | 136 A 0.978*, 270 M 0.999**  | 999 |
| 87      | Rv1186c |               | conserved hypothetical protein                                    | 2.30E-07 | 207 A 0.988*                 | 999 |
| 88      | Rv2741  | PE_PGRS4<br>7 | PE-PGRS family protein                                            | 2.79E-07 | 271 S 0.999**                | 80  |

|     |         |               |                                                   |             |                              |     |
|-----|---------|---------------|---------------------------------------------------|-------------|------------------------------|-----|
| 89  | Rv2495c | <i>pdhC</i>   | dihydrolipoamide S-acetyltransferase E2 component | 3.30E-07    | 107 A 0.997**                | 696 |
| 90  | Rv3777  |               | oxidoreductase                                    | 3. E-07     | 160 A 0.999**                | 999 |
| 91  | Rv0048c |               | membrane protein                                  | 3.67E-07    | 248 E 0.992**, 250 V 0.992** | 999 |
| 92  | Rv3341  | <i>metA</i>   | homoserine O-acetyltransferase                    | 4.12E-07    | 87 S 0.950                   | 999 |
| 93  | Rv3511  | PE_PGRS5<br>5 | PE-PGRS family protein                            | 4.14E-07    | 396 N 0.987*, 589 G 0.991**  | 503 |
| 94  | Rv1716  |               | conserved hypothetical protein                    | 4.19E-07    | 178 G 0.977*, 276 A 0.975*   | 999 |
| 95  | Rv0226c |               | conserved membrane protein                        | 4.34E-07    | 379 P 0.962*                 | 999 |
| 96  | Rv0995  | <i>rimJ</i>   | ribosomal-protein-alanine acetyltransferase       | 4.34E-07    | 23 G 0.997**, 105 Y 0.978*   | 999 |
| 97  | Rv0465c |               | transcriptional regulator                         | 4.49E-07    | 106 C 0.994**                | 999 |
| 98  | Rv1644  | <i>tsnR</i>   | 23S rRNA methyltransferase                        | 5.38E-07    | 232 P 0.994**                | 999 |
| 99  | Rv3764c |               | two component system sensor kinase                | 6.42164E-07 | 246 R 0.961*                 | 999 |
| 100 | Rv1915  | <i>aceAa</i>  | isocitrate lyase                                  | 6.78E-07    | 179 D 0.995**                | 999 |
| 101 | Rv2807  |               | conserved hypothetical protein                    | 8.84E-07    | 72 E 0.998**, 77 D 0.988*    | 999 |
| 102 | Rv2236c | <i>cobD</i>   | cobalamin biosynthesis transmembrane protein      | 9.86E-07    | 79 C 0.991**                 | 744 |
| 103 | Rv0787  |               | hypothetical protein                              | 1.05E-06    | 267 H 0.991**                | 802 |
| 104 | Rv1618  | <i>tesB1</i>  | acyl-CoA thioesterase II                          | 1.07E-06    | 121 L 0.995**                | 999 |
| 105 | Rv0425c | <i>ctpH</i>   | metal cation transporting P-type ATPase           | 1.13E-06    | 689 V 0.982*                 | 398 |
| 106 | Rv1326c | <i>glgB</i>   | 1,4-alpha-glucan branching enzyme                 | 1.22E-06    | 470 S 0.908                  | 999 |
| 107 | Rv0572c |               | hypothetical protein                              | 1.28E-06    | 31 L 0.989*                  | 999 |
| 108 | Rv1640c | <i>lysS</i>   | lysyl-tRNA synthetase 2 lysX                      | 1.36E-06    | 701 I 0.942                  | 999 |
| 109 | Rv3063  | <i>cstA</i>   | carbon starvation protein A                       | 1.45E-06    | 559 S 0.929                  | 999 |
| 110 | Rv3782  |               | L-rhamnosyltransferase                            | 1.66E-06    | 274 V 0.992**                | 999 |
| 111 | Rv3021c | PPE47         | PPE family protein                                | 2.26E-06    | 222 A 0.952*                 | 64  |
| 112 | Rv2433c |               | hypothetical protein                              | 2.29E-06    | 26 L 0.998**                 | 999 |
| 113 | Rv2316  | <i>uspA</i>   | sugar-transport membrane protein ABC transporter  | 2.38E-06    | 67 D 0.996**, 127 L 0.974*   | 999 |
| 114 | Rv1232c |               | conserved hypothetical protein                    | 2.53E-06    | 149 G 0.981*                 | 483 |
| 115 | Rv0103c | <i>ctpB</i>   | cation-transporter P-type ATPase B                | 3.02E-06    | 22 S 0.981*                  | 999 |
| 116 | Rv2611c |               | acyltransferase                                   | 3.22E-06    | 197 C 0.979*                 | 999 |
| 117 | Rv0676c | <i>mmpL5</i>  | transmembrane transport protein                   | 3.27E-06    | 948 V 0.934                  | 999 |
| 118 | Rv1160  | <i>mutT2</i>  | mutator protein mutT                              | 3.46E-06    | 58 G 0.969*                  | 999 |
| 119 | Rv3879c |               | hypothetical alanine and proline rich protein     | 3.68E-06    | 729 S 0.980*                 | 269 |

|     |         |              |                                                             |          |                                                                                        |     |
|-----|---------|--------------|-------------------------------------------------------------|----------|----------------------------------------------------------------------------------------|-----|
| 120 | Rv1321  |              | conserved hypothetical protein                              | 3.69E-06 | 144 R 0.997**                                                                          | 999 |
| 121 | Rv3497c | <i>mce4C</i> | MCE-family protein                                          | 4.09E-06 | 191 R 0.928                                                                            | 999 |
| 122 | Rv1486c |              | conserved hypothetical protein                              | 4.17E-06 | 198 N 0.972*                                                                           | 999 |
| 123 | Rv3365c |              | conserved hypothetical protein                              | 4.20E-06 | 38 P 0.989*, 687 S 0.953*                                                              | 999 |
| 124 | Rv1127c | <i>ppdK</i>  | pyruvate, phosphate dikinase                                | 4.92E-06 | 69 E 0.899                                                                             | 999 |
| 125 | Rv1400c | <i>lipI</i>  | lipase lipH                                                 | 5.04E-06 | 106 T 0.989*                                                                           | 999 |
| 126 | Rv3892c | PPE69        | PPE family protein                                          | 5.65E-06 | 19 K 0.962*                                                                            | 999 |
| 127 | Rv1908c | <i>katG</i>  | catalase-peroxidase-peroxynitritase T                       | 5.98E-06 | 315 T 0.979*                                                                           | 724 |
| 128 | Rv3655c |              | conserved hypothetical protein                              | 6.23E-06 | 100 S 0.979*                                                                           | 119 |
| 129 | Rv0557  | <i>pimB</i>  | mannosyltransferase                                         | 6.32E-06 | none                                                                                   | 1   |
| 130 | Rv3144c | PPE52        | PPE family protein                                          | 6.42E-06 | 226 S 0.969*                                                                           | 999 |
| 131 | Rv0758  | <i>phoR</i>  | two component system sensor kinase                          | 7.11E-06 | 172 L 0.980*                                                                           | 999 |
| 132 | Rv1538c | <i>ansA</i>  | L-aporaginase                                               | 7.79E-06 | 281 G 0.985*                                                                           | 999 |
| 133 | Rv2290  | <i>lppO</i>  | lipoprotein                                                 | 8.61E-06 | 16 A 0.986*                                                                            | 999 |
| 134 | Rv0855  | <i>far</i>   | fatty-acid-CoA racemase                                     | 8.78E-06 | 24 A 0.993**                                                                           | 342 |
| 135 | Rv3737  |              | conserved membrane protein                                  | 9.15E-06 | 40 G 0.853                                                                             | 999 |
| 136 | Rv2037c |              | conserved membrane protein                                  | 9.16E-06 | 312 Y 0.914                                                                            | 999 |
| 137 | Rv3282  | <i>maf</i>   | conserved hypothetical protein                              | 9.30E-06 | 80 A 0.988*                                                                            | 999 |
| 138 | Rv1300  | <i>hemK</i>  | hypothetical protein                                        | 9.49E-06 | 194 C 0.988*                                                                           | 999 |
| 139 | Rv3317  | <i>sdhD</i>  | succinate dehydrogenase hydrophobic membrane anchor subunit | 1.00E-05 | 112 T 0.998**, 114 R 0.990**                                                           | 999 |
| 140 | Rv3347c | PPE55        | PPE family protein                                          | 1.07E-05 | 786 V 0.781                                                                            | 1   |
| 141 | Rv3591c |              | hydrolase                                                   | 1.07E-05 | 156 F 0.986*                                                                           | 999 |
| 142 | Rv0668  | <i>rpoC</i>  | DNA-directed RNA polymerase beta chain                      | 1.13E-05 | 404 D 0.975*, 484 W 0.975*, 698 N 0.998**, 1040 P 0.976*, 1092 E 0.988*, 1231 R 0.976* | 999 |
| 143 | Rv3329  |              | aminotransferase                                            | 1.16E-05 | 122 H 0.969*                                                                           | 999 |
| 144 | Rv1900c | <i>lipJ</i>  | lignin peroxidase                                           | 1.19E-05 | 204 M 0.946                                                                            | 999 |
| 145 | Rv0538  |              | conserved membrane protein                                  | 1.21E-05 | 228 P 0.960*                                                                           | 999 |
| 146 | Rv2482c | <i>plsB2</i> | glycerol-3-phosphate acyltransferase                        | 1.22E-05 | 778 R 0.956*                                                                           | 999 |
| 147 | Rv3919c | <i>gid</i>   | glucose-inhibited division protein B                        | 1.25E-05 | 92 E 0.973*, 96 R 0.992**, 145 L 0.992**                                               | 141 |



**Supplementary Table 12:** Genes significant by each of phyC, dN/dS, and differential density for isoniazid resistance in increasing order of p-value. In bold and underlined are genes previously associated with resistance to isoniazid.

| Phylogenetic Convergence |                       |                    |                                                        |                                                                                                               |                    |
|--------------------------|-----------------------|--------------------|--------------------------------------------------------|---------------------------------------------------------------------------------------------------------------|--------------------|
| Number                   | Rvnumber              | Symbol             | Description                                            | P-value (<0.05) *Site & Gene convergence. ** Site convergence only (p-values ordered by site1, (site2), gene) | Convergent site(s) |
| 1                        | Rv3795                | <i>embB</i>        | membrane indolylacetylinsitol arabinosyltransferase    | <0.0001                                                                                                       |                    |
| 2                        | Rv2043c               | <i>pncA</i>        | pyrazinamidase/nicotinamidase                          | <0.0001                                                                                                       |                    |
| 3                        | Rv0682                | <i>rpsL</i>        | 30S ribosomal protein S12                              | <0.0001, 0.0005*                                                                                              | 128G               |
| 4                        | Rv0667                | <i>rpoB</i>        | DNA-directed RNA polymerase beta chain                 | <0.0001, 0.0022, 0.0038*                                                                                      | 1349T, 1304T       |
| 5                        | Rv2931                | <i>ppsA</i>        | phenolphthiocerol synthesis type-I polyketide synthase | 0.0018                                                                                                        |                    |
| 6                        | Rv2896c               |                    | conserved hypothetical protein                         | 0.0038**                                                                                                      | 457T               |
| 7                        | Rvnr01                | <i>rrs</i>         | ribosomal RNA 16S                                      | 0.0053                                                                                                        |                    |
| 8                        | Rv2155c               | <i>murD</i>        | UDP-N-acetylmuramoylalanine-D-glutamate ligase         | 0.0062                                                                                                        |                    |
| 9                        | Rv0746                | PE_PGRS9           | PE-PGRS family protein                                 | 0.0062                                                                                                        |                    |
| 10                       | Rv2853                | PE_PGRS48          | PE-PGRS family protein                                 | 0.0085                                                                                                        |                    |
| <b>11</b>                | <b><u>Rv1908c</u></b> | <b><u>katG</u></b> | <b><u>catalase-peroxidase-peroxynitritase T</u></b>    | <b><u>0.0118</u></b>                                                                                          |                    |
| 12                       | Rv0388c               | PPE9               | PPE family protein                                     | 0.0179                                                                                                        |                    |
| 13                       | Rv3854c               | <i>ethA</i>        | monooxygenase                                          | 0.0223                                                                                                        |                    |
| 14                       | Rv0064                |                    | conserved membrane protein                             | 0.0287                                                                                                        |                    |
| 15                       | Rv2082                |                    | conserved hypothetical protein                         | 0.0346                                                                                                        |                    |
| Differential Density     |                       |                    |                                                        |                                                                                                               |                    |
| Number                   | Rv-number             | Symbol             | Description                                            | P-value (<0.05)                                                                                               | Clustering Index   |
| 1                        | Rv0667                | <i>rpoB</i>        | DNA-directed RNA polymerase beta chain                 | <0.0001                                                                                                       | 26                 |
| 2                        | Rv3795                | <i>embB</i>        | membrane indolylacetylinsitol arabinosyltransferase    | <0.0001                                                                                                       | 12                 |
| 3                        | Rv2043c               | <i>pncA</i>        | pyrazinamidase/nicotinamidase                          | <0.0001                                                                                                       | 15                 |
| 4                        | Rvnr01                | <i>rrs</i>         | ribosomal RNA 16S                                      | 0.0001                                                                                                        | 12                 |
| 5                        | Rv2853                | PE_PGRS48          | PE-PGRS family protein                                 | 0.0052                                                                                                        | 9                  |
| 6                        | Rv2931                | <i>ppsA</i>        | phenolphthiocerol synthesis type-I polyketide synthase | 0.0096                                                                                                        | 6                  |
| 7                        | Rv3854c               | <i>ethA</i>        | monooxygenase                                          | 0.0164                                                                                                        | 8                  |
| 8                        | Rv0006                | <i>gyrA</i>        | DNA gyrase subunit A                                   | 0.024                                                                                                         | 5                  |

|           |                |                    |                                                     |               |          |
|-----------|----------------|--------------------|-----------------------------------------------------|---------------|----------|
| 9         | Rv2024c        |                    | conserved hypothetical protein                      | 0.0515        | 6        |
| 10        | Rv0682         | <i>rpsL</i>        | 30S ribosomal protein S12                           | 0.0674        | 7        |
| 11        | Rv0977         | PE_PGRS16          | PE-PGRS family protein                              | 0.0822        | 6        |
| <b>12</b> | <b>Rv1908c</b> | <b><i>katG</i></b> | <b><u>catalase-peroxidase-peroxynitritase T</u></b> | <b>0.1445</b> | <b>6</b> |
| 13        | Rv1325c        | PE_PGRS24          | PE-PGRS family protein                              | 0.1778        | 6        |
| 14        | Rv2946c        | <i>pks1</i>        | polyketide synthase                                 | 0.301         | 5        |
| 15        | Rv0995         | <i>rimJ</i>        | ribosomal-protein-alanine acetyltransferase         | 0.5038        | 5        |
| 16        | Rv2828c        |                    | conserved hypothetical protein                      | 0.5564        | 5        |
| 17        | Rv3468c        |                    | dTDP-glucose-4,6-dehydratase                        | 0.5564        | 5        |
| 18        | Rv1193         | <i>fadD36</i>      | fatty-acid-CoA ligase                               | 0.5693        | 5        |
| 19        | Rv0988         |                    | hypothetical exported protein                       | 0.5693        | 5        |
| 20        | Rv1441c        | PE_PGRS26          | PE-PGRS family protein                              | 0.5693        | 5        |
| 21        | 593            |                    |                                                     | 0.5693        | 5        |

| dN/dS  |           |             |                                                        |                    |                                                                           |                                            |
|--------|-----------|-------------|--------------------------------------------------------|--------------------|---------------------------------------------------------------------------|--------------------------------------------|
| Number | Rv-number | Symbol      | Description                                            | P-value (<1.25E-5) | Significant site(s) by Bayesian empiric bayes method * <0.05, **<0.01     | Class dN/dS $\psi$ (Supplementary Table 7) |
| 1      | Rv0746    | PE_PGRS9    | PE-PGRS family protein                                 | 1.03E-47           | 191 G 1.000**, 252 A 0.998**, 280 D 1.000**, 320 A 1.000**, 445 A 1.000** | 354                                        |
| 2      | Rv0532    | PE_PGRS6    | PE-PGRS family protein                                 | 6.00E-28           | 227 D 0.965*, 239 G 1.000**                                               | 999                                        |
| 3      | Rv0279c   | PE_PGRS4    | PE-PGRS family protein                                 | 1.19E-26           | 77 V 1.000**, 325 N 0.995**, 352 G 1.000**, 372 I 0.986*                  | 130                                        |
| 4      | Rv0667    | <i>rpoB</i> | DNA-directed RNA polymerase beta chain                 | 1.30E-25           | 435 D 1.000**, 445 H 0.974*, 450 L 1.000**, 452 L 0.976*                  | 228                                        |
| 5      | Rv0747    | PE_PGRS10   | PE-PGRS family protein                                 | 4.23E-25           | 295 K 1.000**, 300 S 1.000**                                              | 321                                        |
| 6      | Rv2931    | <i>ppsA</i> | phenolphthiocerol synthesis type-I polyketide synthase | 6.77E-24           | 624 D 1.000**, 803 A 0.980*, 1194 L 0.990**                               | 824                                        |
| 7      | Rv2853    | PE_PGRS48   | PE-PGRS family protein                                 | 1.90E-22           | 180 G 1.000**                                                             | 999                                        |
| 8      | Rv3795    | <i>embB</i> | membrane indolylacetyl-inositol arabinosyltransferase  | 5.28E-21           | 306 I 1.000**, 354 D 0.997**, 406 G 0.997**, 497 Q 0.974*                 | 999                                        |
| 9      | Rv1753c   | PPE24       | PPE family protein                                     | 6.34E-17           | 488 T 1.000**                                                             | 999                                        |
| 10     | Rv2828c   |             | conserved hypothetical protein                         | 5.71E-16           | 128 S 1.000**                                                             | 999                                        |
| 11     | Rv0278c   | PE_PGRS3    | PE-PGRS family protein                                 | 2.09E-15           | 807 G 1.000**                                                             | 312                                        |
| 12     | Rv2024c   |             | conserved hypothetical protein                         | 2.88E-15           | 47 R 0.996**, 154 G 1.000**                                               | 472                                        |
| 13     | Rv0058    | <i>dnaB</i> | replicative DNA helicase                               | 6.33E-15           | 552 R 1.000**                                                             | 999                                        |
| 14     | Rv2079    |             | conserved hypothetical protein                         | 6.35E-15           | 47 C 1.000**, 95 L 0.977*                                                 | 999                                        |
| 15     | Rv0006    | <i>gyrA</i> | DNA gyrase subunit A                                   | 6.94E-15           | 90 A 0.999**, 94 A 1.000**, 95 T 1.000**                                  | 999                                        |

|    |         |               |                                                |          |                                           |     |
|----|---------|---------------|------------------------------------------------|----------|-------------------------------------------|-----|
|    |         |               |                                                |          | 292 R 0.979*, 376 R 0.980*, 668 D 1.000** |     |
| 16 | Rv0658c |               | conserved membrane protein                     | 1.22E-14 | 75 P 1.000**                              | 999 |
| 17 | 1       |               | conserved membrane protein                     | 1.52E-14 | 316 R 1.000**                             | 999 |
| 18 | Rv2825c |               | conserved hypothetical protein                 | 1.90E-14 | 162 S 1.000**                             | 999 |
| 19 | Rv1446c | <i>opcA</i>   | oxpp cycle protein                             | 3.49E-14 | 192 R 1.000**                             | 999 |
| 20 | Rv0018c | <i>ppp</i>    | serine/threonine phosphatase                   | 1.24E-13 | 463 S 1.000**                             | 999 |
| 21 | Rv3512  | PE_PGRS56     | PE-PGRS family protein                         | 2.06E-13 | 253 A 0.957*, 306 I 0.975*                | 999 |
| 22 | Rv2917  |               | conserved alanine and arginine rich protein    | 1.18E-12 | 594 L 1.000**                             | 999 |
| 23 | Rv0280  | PPE3          | PPE family protein                             | 1.28E-12 | 337 S 1.000**                             | 999 |
| 24 | Rv0236c |               | conserved membrane protein                     | 1.55E-12 | 1080 G 0.999**                            | 323 |
| 25 | Rv0050  | <i>ponA1</i>  | bifunctional penicillin-binding protein        | 1.61E-12 | 631 P 1.000**                             | 999 |
| 26 | Rv0800  | <i>pepC</i>   | aminopeptidase                                 | 1.80E-12 | 139 L 1.000**                             | 999 |
| 27 | Rv2896c |               | conserved hypothetical protein                 | 2.02E-12 | 153 A 1.000**                             | 999 |
| 28 | Rv2450c | <i>rpfE</i>   | resuscitation-promoting factor                 | 2.33E-12 | 20 T 0.992**, 126 R 1.000**               | 999 |
| 29 | Rv1812c |               | dehydrogenase                                  | 2.41E-12 | 30 P 0.998**                              | 999 |
| 30 | Rv0388c | PPE9          | PPE family protein                             | 2.71E-12 | 138 A 1.000**, 139 Q 1.000**              | 47  |
| 31 | Rv2155c | <i>murD</i>   | UDP-N-acetylmuramoylalanine-D-glutamate ligase | 3.64E-12 | 247 G 1.000**                             | 999 |
| 32 | Rv3711c | <i>dnaQ</i>   | DNA polymerase III epsilon subunit             | 5.25E-12 | 211 L 1.000**                             | 999 |
| 33 | Rv3366  | <i>spoU</i>   | tRNA/rRNA methylase                            | 1.11E-11 | 92 R 1.000**                              | 999 |
| 34 | Rv3077  |               | hydrolase                                      | 2.62E-11 | 310 G 1.000**                             | 197 |
| 35 | Rv1394c | <i>cyp132</i> | cytochrome P450 132                            | 4.94E-11 | 135 L 0.999**                             | 999 |
| 36 | Rv2490c | PE_PGRS43     | PE-PGRS family protein                         | 5.13E-11 | 1399 G 0.996**                            | 999 |
| 37 | Rv0964c |               | hypothetical protein                           | 4.18E-10 | 124 T 0.999**                             | 999 |
| 39 | Rv3245c | <i>mtrB</i>   | two component system sensor histidine kinase   | 1.43E-09 | 18 P 0.999**, 517 L 0.984*                | 875 |
| 41 | Rv3776  |               | conserved hypothetical protein                 | 1.91E-09 | 112 S 0.983*, 329 V 0.996**               | 484 |
| 42 | Rv0082  |               | oxidoreductase                                 | 1.95E-09 | 74 R 0.986*                               | 999 |
| 43 | Rv2584c | <i>apt</i>    | adenine phosphoribosyltransferase              | 2.15E-09 | 147 E 0.999**                             | 999 |
| 44 | Rv0064  |               | conserved membrane protein                     | 2.17E-09 | 906 R 1.000**                             | 347 |
| 45 | Rv2823c |               | conserved hypothetical protein                 | 2.39E-09 | 101 Y 0.999**                             | 999 |
| 46 | Rv2458  | <i>mmuM</i>   | homocysteine S-methyltransferase               | 2.64E-09 | 125 Y 0.998**                             | 999 |
| 47 | Rv2439c | <i>proB</i>   | glutamate 5-kinase protein                     | 2.81E-09 | 226 S 0.993**                             | 999 |
| 48 | Rv3511  | PE_PGRS55     | PE-PGRS family protein                         | 2.86E-09 | 396 N 0.988*, 589 G 0.991**               | 503 |
| 49 | Rv2947c | <i>pks15</i>  | polyketide synthase                            | 3.13E-09 | 333 A 0.999**                             | 999 |

|           |                |                    |                                                   |                 |                              |            |
|-----------|----------------|--------------------|---------------------------------------------------|-----------------|------------------------------|------------|
| 50        | Rv3468c        |                    | dTDP-glucose-4,6-dehydratase                      | 4.46E-09        | 62 V 0.999**                 | 999        |
| <b>51</b> | <b>Rv1908c</b> | <b><i>katG</i></b> | <b>catalase-oxidase-<br/>peroxynitrate T</b>      | <b>5.77E-09</b> | <b>315 T 0.998**</b>         | <b>939</b> |
| 52        | Rv2488c        |                    | transcriptional regulator, luxR-family            | 6.03E-09        | 265 T 0.997**                | 999        |
| 53        | Rv2567         |                    | conserved alanine and leucine rich protein        | 8.13E-09        | 645 Q 0.988*                 | 999        |
| 54        | Rv3835         |                    | conserved membrane protein                        | 1.01E-08        | 294 L 0.996**                | 999        |
| 55        | Rv1704c        | <i>cycA</i>        | D-serine/alanine/glycine transporter protein      | 1.01E-08        | 93 L 0.994**                 | 999        |
| 56        | Rv2874         | <i>dipZ</i>        | cytochrome C biogenesis protein                   | 1.16E-08        | 672 D 0.986*                 | 999        |
| 57        | Rv2059         |                    | conserved hypothetical protein                    | 1.81E-08        | 317 T 0.990**                | 999        |
| 58        | Rv1378c        |                    | conserved hypothetical protein                    | 1.92E-08        | 37 W 0.994**                 | 999        |
| 59        | Rv1463         |                    | ABC transporter ATP-binding protein               | 2.73E-08        | 198 E 0.992**                | 999        |
| 60        | Rv1319c        |                    | adenylate cyclase                                 | 2.80E-08        | 439 D 0.993**                | 206        |
| 61        | Rv0417         | <i>thiG</i>        | thiamin biosynthesis protein                      | 4.03E-08        | 75 C 0.998**                 | 343        |
| 62        | Rv0758         | <i>phoR</i>        | two component system sensor kinase                | 4.09E-08        | 172 L 0.996**                | 999        |
| 63        | Rv2090         |                    | 5-3 exonuclease                                   | 4.33E-08        | 358 F 0.994**                | 999        |
| 64        | Rv0338c        |                    | iron-sulfur-binding reductase                     | 5.72E-08        | 506 G 0.992**, 621 V 0.992** | 999        |
| 65        | Rv0881         |                    | rRNA methyltransferase                            | 6.06E-08        | 115 R 0.999**                | 633        |
| 66        | Rv2905         | <i>lppW</i>        | alanine rich lipoprotein                          | 6.25E-08        | 81 Q 0.992**                 | 999        |
| 67        | Rv0159c        | PE3                | PE family protein                                 | 7.45E-08        | 14 A 0.994**                 | 999        |
| 68        | Rv0980c        | PE_PGRS18          | PE-PGRS family protein                            | 8.30E-08        | None                         | 1          |
| 69        | Rv1193         | <i>fadD36</i>      | fatty-acid-CoA ligase                             | 1.32E-07        | 124 P 0.996**                | 999        |
| 70        | Rv1186c        |                    | conserved hypothetical protein                    | 1.57E-07        | 207 A 0.988*                 | 999        |
| 71        | Rv1971         | <i>mce3F</i>       | MCE-family protein                                | 2.03E-07        | 396 E 0.997**                | 999        |
| 72        | Rv2017         |                    | transcriptional regulator                         | 2.15E-07        | 262 E 0.993**                | 999        |
| 73        | Rv3630         |                    | conserved membrane protein                        | 2.70E-07        | 40 T 0.995**                 | 999        |
| 74        | Rv1027c        | <i>kdpE</i>        | transcriptional regulator                         | 2.79E-07        | 60 G 0.970*                  | 999        |
| 76        | Rv2495c        | <i>pdhC</i>        | dihydrolipoamide S-acetyltransferase E2 component | 3.30E-07        | 107 A 0.997**                | 696        |
| 77        | Rv0834c        | PE_PGRS14          | PE-PGRS family protein                            | 3.54E-07        | 804 N 0.990*                 | 999        |
| 78        | Rv0048c        |                    | membrane protein                                  | 3.67E-07        | 248 E 0.992**, 250 V 0.992** | 999        |
| 79        | Rv1716         |                    | conserved hypothetical protein                    | 4.19E-07        | 178 G 0.977*, 276 A 0.975*   | 999        |
| 80        | Rv0995         | <i>rimJ</i>        | ribosomal-protein-alanine acetyltransferase       | 4.34E-07        | 23 G 0.997**, 105 Y 0.978*   | 999        |
| 81        | Rv0109         | PE_PGRS1           | PE-PGRS family protein                            | 4.46E-07        | 346 G 0.995**                | 999        |
| 82        | Rv0465c        |                    | transcriptional regulator                         | 4.49E-07        | 106 C 0.994**                | 999        |
| 83        | Rv0259c        |                    | conserved hypothetical protein                    | 4.67E-07        | 182 V 0.997**                | 999        |
| 84        | Rv3389c        |                    | dehydrogenase                                     | 4.73E-07        | 165 P 0.974*                 | 999        |

|     |         |              |                                                  |          |                             |     |
|-----|---------|--------------|--------------------------------------------------|----------|-----------------------------|-----|
| 85  | Rv0226c |              | conserved membrane protein                       | 4.87E-07 | 379 P 0.968*                | 999 |
| 86  | Rv1449c | <i>tkt</i>   | transketolase                                    | 6.34E-07 | 18 D 0.902                  | 719 |
| 87  | Rv3764c |              | two component system sensor kinase               | 6.44E-07 | 246 R 0.961*                | 999 |
| 88  | Rv1915  | <i>aceAa</i> | isocitrate lyase                                 | 6.78E-07 | 179 D 0.995**               | 999 |
| 89  | Rv3490  | <i>otsA</i>  | alpha, alpha-trehalose-phosphate synthase        | 7.26E-07 | 77 E 0.958*                 | 999 |
| 90  | Rv0192  |              | conserved hypothetical protein                   | 7.53E-07 | 127 P 0.986*                | 999 |
| 91  | Rv2436  | <i>rbsK</i>  | ribokinase                                       | 7.90E-07 | 282 A 0.994**               | 252 |
| 92  | Rv0538  |              | conserved membrane protein                       | 9.02E-07 | 228 P 0.992**               | 999 |
| 93  | Rv3449  | <i>mycP4</i> | membrane-anchored mycosin                        | 9.92E-07 | 87 T 0.976*                 | 999 |
| 94  | Rv0787  |              | hypothetical protein                             | 1.05E-06 | 267 H 0.991**               | 802 |
| 95  | Rv1326c | <i>glgB</i>  | 1,4-alpha-glucan branching enzyme                | 1.22E-06 | 470 S 0.908                 | 999 |
| 96  | Rv3341  | <i>metA</i>  | homoserine O-acetyltransferase                   | 1.23E-06 | 87 S 0.950                  | 999 |
| 97  | Rv2769c | PE27         | PE family protein                                | 1.31E-06 | 136 A 0.978*, 270 M 0.999** | 999 |
| 98  | Rv1640c | <i>lysS</i>  | lysyl-tRNA synthetase 2 lysX                     | 1.37E-06 | 701 I 0.942                 | 999 |
| 99  | Rv2048c | <i>pks12</i> | hypothetical protein                             | 1.50E-06 | 917 S 0.863                 | 477 |
| 100 | Rv3199c | <i>nudC</i>  | NADH pyrophosphatase                             | 1.55E-06 | 239 P 0.987*                | 999 |
| 101 | Rv0323c |              | conserved hypothetical protein                   | 1.64E-06 | 142 G 0.991**               | 999 |
| 102 | Rv3782  |              | L-rhamnosyltransferase                           | 1.66E-06 | 274 V 0.992**               | 999 |
| 103 | Rv3425  | PPE57        | PPE family protein                               | 2.21E-06 | 128 T 0.994**               | 725 |
| 104 | Rv2433c |              | hypothetical protein                             | 2.35E-06 | 26 L 0.998**                | 999 |
| 105 | Rv2316  | <i>uspA</i>  | sugar-transport membrane protein ABC transporter | 2.38E-06 | 67 D 0.996**, 127 L 0.974*  | 999 |
| 106 | Rv1538c | <i>ansA</i>  | L-aporaginase                                    | 2.40E-06 | 281 G 0.985*                | 999 |
| 108 | Rv1300  | <i>hemK</i>  | hypothetical protein                             | 2.48E-06 | 194 C 0.969*                | 999 |
| 109 | Rv1232c |              | conserved hypothetical protein                   | 2.53E-06 | 149 G 0.981*                | 483 |
| 110 | Rv1895  |              | dehydrogenase                                    | 2.74E-06 | 270 L 0.969*                | 999 |
| 111 | Rv0103c | <i>ctpB</i>  | cation-transporter P-type ATPase B               | 2.91E-06 | 22 S 0.981*                 | 999 |
| 112 | Rv3479  |              | transmembrane protein                            | 2.99E-06 | 174 R 0.937                 | 355 |
| 113 | Rv3590c | PE_PGRS58    | PE-PGRS family protein                           | 3.26E-06 | 314 A 0.856                 | 999 |
| 114 | Rv1160  | <i>mutT2</i> | mutator protein mutT                             | 3.46E-06 | 58 G 0.969*                 | 999 |
| 115 | Rv0425c | <i>ctpH</i>  | metal cation transporting P-type ATPase          | 3.53E-06 | 689 V 0.982*                | 398 |
| 116 | Rv3879c |              | hypothetical alanine and proline rich protein    | 3.68E-06 | 729 S 0.980*                | 269 |
| 117 | Rv1321  |              | conserved hypothetical protein                   | 3.68E-06 | 144 R 0.997**               | 999 |
| 118 | Rv3347c | PPE55        | PPE family protein                               | 4.01E-06 | 786 V 0.894                 | 103 |
| 119 | Rv3497c | <i>mce4C</i> | MCE-family protein                               | 4.09E-06 | 191 R 0.928                 | 999 |
| 120 | Rv1486c |              | conserved hypothetical protein                   | 4.18E-06 | 198 N 0.972*                | 999 |
| 121 | Rv3365c |              | conserved hypothetical protein                   | 4.19E-06 | 38 P 0.989*, 687 S          | 999 |

|     |         |              |                                          |          |               | 0.953* |
|-----|---------|--------------|------------------------------------------|----------|---------------|--------|
| 122 | Rv0118c | <i>oxcA</i>  | oxalyl-CoA decarboxylase                 | 4.82E-06 | 253 A 0.961*  | 503    |
| 123 | Rv3837c |              | phosphoglycerate mutase                  | 4.89E-06 | 15 G 0.989*   | 999    |
| 124 | Rv1400c | <i>lipI</i>  | lipase lipH                              | 5.04E-06 | 106 T 0.989*  | 999    |
| 125 | Rv1489  |              | conserved hypothetical protein           | 5.42E-06 | 52 K 0.990*   | 999    |
| 126 | Rv3892c | PPE69        | PPE family protein                       | 5.65E-06 | 19 K 0.962*   | 999    |
| 127 | Rv3144c | PPE52        | PPE family protein                       | 6.42E-06 | 226 S 0.969*  | 999    |
| 128 | Rv0376c |              | conserved hypothetical protein           | 6.93E-06 | 14 T 0.826    | 102    |
| 129 | Rv2982c | <i>gpsA</i>  | glycerol-3-phosphate dehydrogenase gpdA2 | 7.16E-06 | 133 A 0.985*  | 374    |
| 130 | Rv3805c |              | conserved membrane protein               | 8.25E-06 | 397 D 0.967*  | 999    |
| 131 | Rv2290  | <i>lppO</i>  | lipoprotein                              | 8.61E-06 | 16 A 0.986*   | 999    |
| 132 | Rv0095c |              | conserved hypothetical protein           | 8.90E-06 | 57 D 0.998**  | 999    |
| 133 | Rv3737  |              | conserved membrane protein               | 9.18E-06 | 40 G 0.853    | 999    |
| 134 | Rv1320c |              | adenylate cyclase                        | 9.89E-06 | 531 A 0.977*  | 999    |
| 135 | Rv2015c |              | conserved hypothetical protein           | 1.13E-05 | None          | 1      |
| 136 | Rv3329  |              | aminotransferase                         | 1.16E-05 | 122 H 0.969*  | 999    |
| 137 | Rv2741  | PE_PGRS47    | PE-PGRS family protein                   | 1.18E-05 | 271 S 0.994** | 60     |
| 138 | Rv2482c | <i>plsB2</i> | glycerol-3-phosphate acyltransferase     | 1.22E-05 | 778 R 0.956*  | 999    |

**Supplementary Table 13:** Genes significant by each of phyC, dN/dS, and differential density for ethambutol resistance in increasing order of p-value. In bold and underlined are genes previously associated with resistance to ethambutol.

| <b>Phylogenetic Convergence</b> |                      |                    |                                                                   |                                                                                                               |                                                                          |                                            |
|---------------------------------|----------------------|--------------------|-------------------------------------------------------------------|---------------------------------------------------------------------------------------------------------------|--------------------------------------------------------------------------|--------------------------------------------|
| Number                          | Rv-number            | Symbol             | Description                                                       | P-value (<0.05) *Site & Gene convergence. ** Site convergence only (p-values ordered by site1, (site2), gene) | Convergent site(s)                                                       |                                            |
| 1                               | Rv0667               | <i>rpoB</i>        | DNA-directed RNA polymerase beta chain                            | <0.0001                                                                                                       |                                                                          |                                            |
| <b>2</b>                        | <b><u>Rv3795</u></b> | <b><u>embB</u></b> | <b><u>membrane indolylacetylinsitol arabinosyltransferase</u></b> | <b><u>0.0008</u></b>                                                                                          |                                                                          |                                            |
| 3                               | Rv0050               | <i>ponA1</i>       | bifunctional penicillin-binding protein                           | 0.0024**                                                                                                      | 1891C                                                                    |                                            |
| 4                               | Rv2043c              | <i>pncA</i>        | pyrazinamidase/nicotinamidase                                     | 0.0043                                                                                                        |                                                                          |                                            |
| 5                               | Rv0746               | PE_PGRS9           | PE-PGRS family protein                                            | 0.0086                                                                                                        |                                                                          |                                            |
| 6                               | Rv3919c              | <i>gid</i>         | glucose-inhibited division protein B                              | 0.0198                                                                                                        |                                                                          |                                            |
| 7                               | Rv0747               | PE_PGRS10          | PE-PGRS family protein                                            | 0.0466                                                                                                        |                                                                          |                                            |
| <b>Differential Density</b>     |                      |                    |                                                                   |                                                                                                               |                                                                          |                                            |
| Number                          | Rv-number            | Symbol             | Description                                                       | P-value (<0.05)                                                                                               | Clustering Index                                                         |                                            |
| 1                               | Rv0667               | <i>rpoB</i>        | DNA-directed RNA polymerase beta chain                            | <0.0001                                                                                                       | 18                                                                       |                                            |
| <b>2</b>                        | <b><u>Rv3795</u></b> | <b><u>embB</u></b> | <b><u>membrane indolylacetylinsitol arabinosyltransferase</u></b> | <b><u>0.0082</u></b>                                                                                          | <b>4</b>                                                                 |                                            |
| 3                               | Rv2853               | PE_PGRS48          | PE-PGRS family protein                                            | 0.0173                                                                                                        | 5                                                                        |                                            |
| <b>dN/dS</b>                    |                      |                    |                                                                   |                                                                                                               |                                                                          |                                            |
| Number                          | Rv-number            | Symbol             | Description                                                       | P-value (<1.25E-5)                                                                                            | Significant site(s) by Bayesian empiric bayes method * <0.05, **<0.01    | Class dN/dS $\psi$ (Supplementary Table 7) |
| 1                               | Rv0746               | PE_PGRS9           | PE-PGRS family protein                                            | 8.24E-33                                                                                                      | 191 G 0.997**, 252 A 0.973*, 280 D 1.000**, 320 A 1.000**, 445 A 1.000** | 263                                        |
| 2                               | Rv0747               | PE_PGRS10          | PE-PGRS family protein                                            | 7.12E-26                                                                                                      | 295 K 1.000**, 300 S 1.000**                                             | 213                                        |
| 3                               | Rv2931               | <i>ppsA</i>        | phenolphthiocerol synthesis type-1 polyketide synthase            | 9.66E-22                                                                                                      | 624 D 1.000**, 1194 L 0.989*                                             | 999                                        |

|    |         |               |                                             |          |                                                                        |     |
|----|---------|---------------|---------------------------------------------|----------|------------------------------------------------------------------------|-----|
| 4  | Rv0279c | PE_PGRS4      | PE-PGRS family protein                      | 8.13E-21 | 77 V 1.000**, 325 N 0.995**, 352 G 1.000**, 372 I 0.995**              | 139 |
| 5  | Rv0667  | <i>rpoB</i>   | DNA-directed RNA polymerase beta chain      | 6.99E-20 | 435 D 1.000**, 445 H 0.974*, 450 L 1.000**, 452 L 0.976*, 491 I 0.973* | 174 |
| 6  | Rv0278c | PE_PGRS3      | PE-PGRS family protein                      | 3.39E-19 | 807 G 1.000**                                                          | 999 |
| 7  | Rv0050  | <i>ponA1</i>  | bifunctional penicillin-binding protein     | 6.98E-18 | 631 P 1.000**                                                          | 999 |
| 8  | Rv0388c | PPE9          | PPE family protein                          | 5.43E-16 | 138 A 1.000**, 139 Q 1.000**                                           | 92  |
| 9  | Rv2828c |               | conserved hypothetical protein              | 4.93E-15 | 128 S 1.000**                                                          | 999 |
| 10 | Rv2853  | PE_PGRS4<br>8 | PE-PGRS family protein                      | 7.66E-15 | 180 G 1.000**                                                          | 999 |
| 11 | Rv1753c | PPE24         | PPE family protein                          | 1.37E-14 | 488 T 1.000**                                                          | 999 |
| 12 | Rv1446c | <i>opcA</i>   | oxpp cycle protein                          | 3.53E-14 | 192 R 1.000**                                                          | 999 |
| 13 | Rv2090  |               | 5-3 exonuclease                             | 4.59E-14 | 358 F 0.999**                                                          | 999 |
| 14 | Rv2024c |               | conserved hypothetical protein              | 3.00E-13 | 47 R 0.977*, 154 G 1.000**                                             | 999 |
| 15 | Rv3512  | PE_PGRS5<br>6 | PE-PGRS family protein                      | 3.41E-13 | 253 A 0.935                                                            | 999 |
| 16 | Rv0532  | PE_PGRS6      | PE-PGRS family protein                      | 3.77E-13 | 227 D 0.979*, 239 G 1.000**                                            | 472 |
| 17 | Rv3077  |               | hydrolase                                   | 4.82E-13 | 310 G 1.000**                                                          | 224 |
| 18 | Rv0082  |               | oxidoreductase                              | 1.64E-12 | 74 R 0.998**                                                           | 999 |
| 19 | Rv0058  | <i>dnaB</i>   | replicative DNA helicase                    | 3.81E-12 | 552 R 1.000**                                                          | 999 |
| 20 | Rv0323c |               | conserved hypothetical protein              | 1.28E-11 | 142 G 0.991**                                                          | 999 |
| 21 | Rv0292  |               | conserved membrane protein                  | 1.37E-11 | 217 D 0.998**                                                          | 999 |
| 22 | Rv0006  | <i>gyrA</i>   | DNA gyrase subunit A                        | 2.52E-11 | 90 A 0.999**, 94 A 1.000**, 95 T 0.982*, 376 R 0.981*, 668 D 1.000**   | 999 |
| 23 | Rv0658c |               | conserved membrane protein                  | 3.00E-11 | 75 P 1.000**                                                           | 999 |
| 24 | Rv2874  | <i>dipZ</i>   | cytochrome C biogenesis protein             | 3.08E-11 | 672 D 0.998**                                                          | 999 |
| 25 | Rv2450c | <i>rpjE</i>   | resuscitation-promoting factor              | 4.39E-11 | 126 R 1.000**                                                          | 999 |
| 26 | Rv3711c | <i>dnaQ</i>   | DNA polymerase III epsilon subunit          | 2.31E-10 | 211 L 0.999**                                                          | 999 |
| 27 | Rv2917  |               | conserved alanine and arginine rich protein | 3.35E-10 | 594 L 0.999**                                                          | 999 |
| 28 | Rv0800  | <i>pepC</i>   | aminopeptidase                              | 4.33E-10 | 139 L 0.999**                                                          | 999 |
| 30 | Rv3835  |               | conserved membrane protein                  | 6.17E-10 | 294 L 0.972*                                                           | 999 |
| 31 | Rv1093  | <i>glyA1</i>  | serine hydroxymethyltransferase 1           | 1.05E-09 | 36 A 0.990*                                                            | 999 |



|           |               |                    |                                                                    |                 |                                         |            |
|-----------|---------------|--------------------|--------------------------------------------------------------------|-----------------|-----------------------------------------|------------|
| <b>32</b> | <b>Rv3795</b> | <b><i>embB</i></b> | <b>membrane<br/>indolylacetylinoitol<br/>arabinosyltransferase</b> | <b>1.15E-09</b> | <b>306 I 0.999**, 406 G<br/>0.991**</b> | <b>481</b> |
| 33        | Rv1812c       |                    | dehydrogenase                                                      | 1.35E-09        | 30 P 0.984*                             | 999        |
| 34        | Rv2584c       | <i>apt</i>         | adenine<br>phosphoribosyltransferase                               | 1.38E-09        | 147 E 0.999**                           | 999        |
| 35        | Rv1971        | <i>mce3F</i>       | MCE-family protein                                                 | 1.60E-09        | 396 E 0.999**                           | 999        |
| 36        | Rv2458        | <i>mmuM</i>        | homocysteine S-<br>methyltransferase                               | 2.07E-09        | 125 Y 0.998**                           | 999        |
| 37        | Rv2947c       | <i>pks15</i>       | polyketide synthase                                                | 3.09E-09        | 333 A 0.999**                           | 999        |
| 38        | Rv3347c       | PPE55              | PPE family protein                                                 | 3.95E-09        | 786 V 0.976*, 2259 P<br>0.965*          | 149        |
| 39        | Rv0280        | PPE3               | PPE family protein                                                 | 5.47E-09        | 337 S 0.999**                           | 999        |
| 40        | Rv0833        | PE_PGRS1<br>3      | PE-PGRS family protein                                             | 6.24E-09        | 584 S 0.982*                            | 554        |
| 41        | Rv0236c       |                    | conserved membrane<br>protein                                      | 8.98E-09        | 1080 G 0.968*                           | 224        |
| 42        | Rv3479        |                    | transmembrane protein                                              | 9.85E-09        | 174 R 0.991**                           | 474        |
| 43        | Rv3468c       |                    | dTDP-glucose-4,6-<br>dehydratase                                   | 1.01E-08        | 62 V 0.999**                            | 999        |
| 44        | Rv1704c       | <i>cycA</i>        | D-serine/alanine/glycine<br>transporter protein                    | 1.02E-08        | 93 L 0.994**                            | 999        |
| 45        | Rv2048c       | <i>pks12</i>       | hypothetical protein                                               | 1.14E-08        | 917 S 0.931                             | 701        |
| 46        | Rv1895        |                    | dehydrogenase                                                      | 1.67E-08        | 270 L 0.995**                           | 999        |
| 47        | Rv1378c       |                    | conserved hypothetical<br>protein                                  | 1.93E-08        | 37 W 0.994**                            | 999        |
| 48        | Rv0417        | <i>thiG</i>        | thiamin biosynthesis<br>protein                                    | 2.39E-08        | 75 C 0.999**                            | 708        |
| 49        | Rv1463        |                    | ABC transporter ATP-<br>binding protein                            | 2.76E-08        | 198 E 0.992**                           | 999        |
| 50        | Rv3343c       | PPE54              | PPE family protein                                                 | 3.21E-08        | 103 A 0.899                             | 705        |
| 51        | Rv2333c       |                    | conserved membrane<br>transport protein                            | 4.80E-08        | 69 Y 0.994**                            | 999        |
| 52        | Rv0064        |                    | conserved membrane<br>protein                                      | 4.92E-08        | 457 D 0.984*, 906 R<br>0.984*           | 478        |
| 53        | Rv0964c       |                    | hypothetical protein                                               | 7.27E-08        | 124 T 0.993**                           | 999        |
| 54        | Rv1394c       | <i>cyp132</i>      | cytochrome P450 132                                                | 7.53E-08        | 135 L 0.989*                            | 999        |
| 55        | Rv2896c       |                    | conserved hypothetical<br>protein                                  | 8.43E-08        | 153 A 0.993**                           | 999        |
| 56        | Rv1716        |                    | conserved hypothetical<br>protein                                  | 9.04E-08        | 178 G 0.982*                            | 999        |
| 57        | Rv3093c       |                    | oxidoreductase                                                     | 1.31E-07        | 210 C 0.995**                           | 999        |
| 58        | Rv0787        |                    | hypothetical protein                                               | 1.43E-07        | 267 H 0.994**                           | 999        |
| 59        | Rv1570        | <i>bioD</i>        | dethiobiotin synthetase                                            | 2.02E-07        | 191 T 0.999**                           | 999        |
| 60        | Rv2155c       | <i>murD</i>        | UDP-N-<br>acetylmuramoylalanine-D-<br>glutamate ligase             | 2.43E-07        | 247 G 0.995**                           | 999        |
| 61        | Rv2079        |                    | conserved hypothetical<br>protein                                  | 2.90E-07        | 47 C 0.989*                             | 850        |

|    |         |               |                                                                   |          |                             |     |
|----|---------|---------------|-------------------------------------------------------------------|----------|-----------------------------|-----|
| 62 | Rv0194  |               | drugs-transport transmembrane ATP-binding protein ABC transporter | 2.91E-07 | 74 T 0.994**                | 999 |
| 63 | Rv2490c | PE_PGRS4<br>3 | PE-PGRS family protein                                            | 2.98E-07 | 1399 G 0.990*               | 999 |
| 64 | Rv1319c |               | adenylate cyclase                                                 | 3.09E-07 | 439 D 0.956*                | 248 |
| 65 | Rv0095c |               | conserved hypothetical protein                                    | 4.28E-07 | 57 D 1.000**                | 999 |
| 66 | Rv0302  |               | transcriptional regulator, tetR/acrR-family                       | 4.86E-07 | 84 H 0.995**                | 999 |
| 67 | Rv2769c | PE27          | PE family protein                                                 | 5.32E-07 | 136 A 0.978*, 270 M 0.999** | 999 |
| 68 | Rv2825c |               | conserved hypothetical protein                                    | 6.23E-07 | 162 S 0.951*                | 999 |
| 69 | Rv0425c | <i>ctpH</i>   | metal cation transporting P-type ATPase                           | 6.48E-07 | 689 V 0.987*                | 773 |
| 70 | Rv0218  |               | conserved membrane protein                                        | 7.20E-07 | 316 R 0.901                 | 999 |
| 71 | Rv0538  |               | conserved membrane protein                                        | 8.99E-07 | 228 P 0.992**               | 999 |
| 72 | Rv1326c | <i>glgB</i>   | 1,4-alpha-glucan branching enzyme                                 | 1.25E-06 | 470 S 0.909                 | 999 |
| 73 | Rv3144c | PPE52         | PPE family protein                                                | 1.73E-06 | 226 S 0.969*                | 999 |
| 74 | Rv3511  | PE_PGRS5<br>5 | PE-PGRS family protein                                            | 1.93E-06 | 396 N 0.960*, 589 G 0.995** | 999 |
| 75 | Rv0109  | PE_PGRS1      | PE-PGRS family protein                                            | 2.30E-06 | 346 G 0.995**               | 999 |
| 76 | Rv0284  |               | conserved membrane protein                                        | 2.59E-06 | 214 R 0.975*                | 999 |
| 77 | Rv2037c |               | conserved membrane protein                                        | 3.03E-06 | 312 Y 0.933                 | 999 |
| 78 | Rv3590c | PE_PGRS5<br>8 | PE-PGRS family protein                                            | 3.41E-06 | 314 A 0.877                 | 999 |
| 79 | Rv2101  | <i>helZ</i>   | helicase                                                          | 3.46E-06 | 462 L 0.941                 | 336 |
| 80 | Rv2488c |               | transcriptional regulator, luxR-family                            | 3.66E-06 | 265 T 0.964*                | 999 |
| 81 | Rv0103c | <i>ctpB</i>   | cation-transporter P-type ATPase B                                | 3.67E-06 | 22 S 0.949                  | 999 |
| 82 | Rv1321  |               | conserved hypothetical protein                                    | 3.68E-06 | 144 R 0.997**               | 999 |
| 83 | Rv2741  | PE_PGRS4<br>7 | PE-PGRS family protein                                            | 3.84E-06 | 271 S 0.999**               | 135 |
| 84 | Rv1486c |               | conserved hypothetical protein                                    | 4.21E-06 | 198 N 0.972*                | 999 |
| 85 | Rv2611c |               | acyltransferase                                                   | 4.21E-06 | 197 C 0.910                 | 999 |
| 86 | Rv1320c |               | adenylate cyclase                                                 | 4.49E-06 | 531 A 0.977*                | 999 |
| 87 | Rv0018c | <i>ppp</i>    | serine/threonine phosphatase                                      | 4.82E-06 | 463 S 0.980*                | 999 |
| 88 | Rv2770c | PPE44         | PPE family protein                                                | 5.01E-06 | 194 F 0.974*                | 999 |
| 89 | Rv0881  |               | rRNA methyltransferase                                            | 6.64E-06 | 115 R 0.990*                | 477 |

|     |         |              |                                                   |          |                                        |     |
|-----|---------|--------------|---------------------------------------------------|----------|----------------------------------------|-----|
| 90  | Rv2495c | <i>pdhC</i>  | dihydrolipoamide S-acetyltransferase E2 component | 6.98E-06 | 107 A 0.987*                           | 389 |
| 91  | Rv2982c | <i>gpsA</i>  | glycerol-3-phosphate dehydrogenase gpdA2          | 7.14E-06 | 133 A 0.985*                           | 374 |
| 92  | Rv0355c | PPE8         | PPE family protein                                | 7.39E-06 | 2571 A 0.665                           | 999 |
| 93  | Rv2059  |              | conserved hypothetical protein                    | 7.39E-06 | 317 T 0.940                            | 999 |
| 95  | Rv1127c | <i>ppdK</i>  | pyruvate, phosphate dikinase                      | 8.04E-06 | 69 E 0.900                             | 999 |
| 96  | Rv1300  | <i>hemK</i>  | hypothetical protein                              | 9.54E-06 | 194 C 0.988*                           | 999 |
| 97  | Rv2290  | <i>lppO</i>  | lipoprotein                                       | 1.01E-05 | 16 A 0.986*                            | 999 |
| 98  | Rv3329  |              | aminotransferase                                  | 1.17E-05 | 122 H 0.969*                           | 999 |
| 99  | Rv3919c | <i>gid</i>   | glucose-inhibited division protein B              | 1.17E-05 | 92 E 0.968*, 96 R 0.989*, 145 L 0.989* | 170 |
| 100 | Rv1900c | <i>lipJ</i>  | lignin peroxidase                                 | 1.20E-05 | 204 M 0.947                            | 999 |
| 101 | Rv2482c | <i>plsB2</i> | glycerol-3-phosphate acyltransferase              | 1.23E-05 | 778 R 0.956*                           | 999 |

**Supplementary Table 14:** Genes significant by each of phyC, dN/dS, and differential density for streptomycin resistance in increasing order of p-value. In bold and underlined are genes previously associated with resistance to streptomycin.

| <b>Phylogenetic Convergence</b> |                      |                    |                                                        |                                                                                                               |                                                                       |                                            |
|---------------------------------|----------------------|--------------------|--------------------------------------------------------|---------------------------------------------------------------------------------------------------------------|-----------------------------------------------------------------------|--------------------------------------------|
| Number                          | Rv-number            | Symbol             | Description                                            | P-value (<0.05) *Site & Gene convergence. ** Site convergence only (p-values ordered by site1, (site2), gene) | Convergent site(s)                                                    |                                            |
| <b>1</b>                        | <b><u>Rv0682</u></b> | <b><u>rpsL</u></b> | <b><u>30S ribosomal protein S12</u></b>                | <b><u>0.0001, 0.0012*</u></b>                                                                                 | <b><u>128G</u></b>                                                    |                                            |
| 2                               | Rv0667               | <i>rpoB</i>        | DNA-directed RNA polymerase beta chain                 | 0.0002                                                                                                        |                                                                       |                                            |
| 3                               | Rv2896c              |                    | conserved hypothetical protein                         | 0.0021**                                                                                                      | 457T                                                                  |                                            |
| 4                               | Rv2931               | <i>ppsA</i>        | phenolphthiocerol synthesis type-I polyketide synthase | 0.008                                                                                                         |                                                                       |                                            |
| 5                               | Rv0746               | PE_PGRS9           | PE-PGRS family protein                                 | 0.0327                                                                                                        |                                                                       |                                            |
| 6                               | Rv0218               |                    | conserved membrane protein                             | 0.0367**                                                                                                      | 946T                                                                  |                                            |
| 7                               | Rv0658c              |                    | conserved membrane protein                             | 0.0408**                                                                                                      | 224T                                                                  |                                            |
| <b>Differential density</b>     |                      |                    |                                                        |                                                                                                               |                                                                       |                                            |
| Number                          | Rv-number            | Symbol             | Description                                            | P-value (<0.05)                                                                                               | Clustering Index                                                      |                                            |
| 1                               | Rv0667               | <i>rpoB</i>        | DNA-directed RNA polymerase beta chain                 | <0.0001                                                                                                       | 6                                                                     |                                            |
| <b>2</b>                        | <b><u>Rv0682</u></b> | <b><u>rpsL</u></b> | <b><u>30S ribosomal protein S12</u></b>                | <b><u>0.0597</u></b>                                                                                          | <b><u>5</u></b>                                                       |                                            |
| 3                               | Rv3468c              |                    | dTDP-glucose-4,6-dehydratase                           | 0.0851                                                                                                        | 5                                                                     |                                            |
| <b>dN/dS</b>                    |                      |                    |                                                        |                                                                                                               |                                                                       |                                            |
| Number                          | Rv-number            | Symbol             | Description                                            | P-value (<1.25E-5)                                                                                            | Significant site(s) by Bayesian empiric bayes method * <0.05, **<0.01 | Class dN/dS $\psi$ (Supplementary Table 7) |
| 1                               | Rv2931               | <i>ppsA</i>        | phenolphthiocerol synthesis type-I polyketide synthase | 3.65E-25                                                                                                      | 624 D 1.000**, 803 A 0.978*, 1194 L 0.988*                            | 999                                        |
| 2                               | Rv0746               | PE_PGRS9           | PE-PGRS family protein                                 | 9.79E-23                                                                                                      | 191 G 0.997**, 280 D 1.000**, 320 A 1.000**, 445 A 1.000**            | 303                                        |
| 3                               | Rv0279c              | PE_PGRS4           | PE-PGRS family protein                                 | 2.31E-20                                                                                                      | 77 V 1.000**                                                          | 799                                        |
| 4                               | Rv0278c              | PE_PGRS3           | PE-PGRS family protein                                 | 3.27E-18                                                                                                      | 807 G 1.000**                                                         | 999                                        |
| 5                               | Rv0218               |                    | conserved membrane protein                             | 7.26E-17                                                                                                      | 316 R 1.000**                                                         | 999                                        |
| 6                               | Rv0667               | <i>rpoB</i>        | DNA-directed RNA                                       | 2.70E-15                                                                                                      | 435 D 0.999**, 450 L                                                  | 185                                        |

|    |         |               |                                                     |          |                                                                                    |     |
|----|---------|---------------|-----------------------------------------------------|----------|------------------------------------------------------------------------------------|-----|
|    |         |               | polymerase beta chain                               |          | 1.000**, 452 L 0.967*                                                              |     |
| 7  | Rv2828c |               | conserved hypothetical protein                      | 4.92E-15 | 128 S 1.000**                                                                      | 999 |
| 8  | Rv0658c |               | conserved membrane protein                          | 8.23E-15 | 75 P 1.000**                                                                       | 999 |
| 9  | Rv3795  | <i>embB</i>   | membrane indolylacetylinoitol arabinosyltransferase | 1.30E-14 | 306 I 1.000**, 354 D 0.995**, 497 Q 0.964*                                         | 999 |
| 10 | Rv3512  | PE_PGRS56     | PE-PGRS family protein                              | 2.41E-14 | 253 A 0.952*, 306 I 0.952*                                                         | 999 |
| 11 | Rv0747  | PE_PGRS10     | PE-PGRS family protein                              | 7.42E-14 | 295 K 0.999**, 300 S 1.000**                                                       | 261 |
| 12 | Rv2874  | <i>dipZ</i>   | cytochrome C biogenesis protein                     | 2.23E-13 | 672 D 0.986*                                                                       | 999 |
| 13 | Rv0018c | <i>ppp</i>    | serine/threonine phosphatase                        | 3.36E-13 | 463 S 1.000**                                                                      | 999 |
| 14 | Rv2079  |               | conserved hypothetical protein                      | 5.99E-13 | 47 C 1.000**                                                                       | 999 |
| 15 | Rv1753c | PPE24         | PPE family protein                                  | 1.96E-12 | 488 T 1.000**                                                                      | 999 |
| 16 | Rv2896c |               | conserved hypothetical protein                      | 2.01E-12 | 153 A 1.000**                                                                      | 999 |
| 17 | Rv0532  | PE_PGRS6      | PE-PGRS family protein                              | 2.76E-12 | 239 G 1.000**                                                                      | 999 |
| 18 | Rv0006  | <i>gyrA</i>   | DNA gyrase subunit A                                | 9.55E-12 | 90 A 0.999**, 94 A 1.000**, 95 T 0.984*, 292 R 0.983*, 376 R 0.984*, 668 D 1.000** | 999 |
| 19 | Rv3366  | <i>spoU</i>   | tRNA/rRNA methylase                                 | 1.11E-11 | 92 R 1.000**                                                                       | 999 |
| 20 | Rv1446c | <i>opcA</i>   | oxpp cycle protein                                  | 1.32E-11 | 192 R 0.998**                                                                      | 999 |
| 21 | Rv2024c |               | conserved hypothetical protein                      | 4.18E-11 | 47 R 0.969*, 154 G 1.000**                                                         | 790 |
| 22 | Rv3343c | PPE54         | PPE family protein                                  | 4.32E-11 | 103 A 0.928                                                                        | 645 |
| 23 | Rv1394c | <i>cyp132</i> | cytochrome P450 132                                 | 9.74E-11 | 135 L 0.999**                                                                      | 999 |
| 24 | Rv0050  | <i>ponA1</i>  | bifunctional penicillin-binding protein             | 1.60E-10 | 631 P 0.999**                                                                      | 999 |
| 25 | Rv3468c |               | dTDP-glucose-4,6-dehydratase                        | 1.85E-10 | 62 V 1.000**                                                                       | 999 |
| 26 | Rv0064  |               | conserved membrane protein                          | 2.59E-10 | 906 R 1.000**                                                                      | 539 |
| 27 | Rv0758  | <i>phoR</i>   | two component system sensor kinase                  | 2.64E-10 | 172 L 0.999**                                                                      | 999 |
| 28 | Rv2917  |               | conserved alanine and arginine rich protein         | 3.35E-10 | 594 L 0.999**                                                                      | 999 |
| 29 | Rv0800  | <i>pepC</i>   | aminopeptidase                                      | 9.12E-10 | 139 L 0.999**                                                                      | 999 |
| 30 | Rv0058  | <i>dnaB</i>   | replicative DNA helicase                            | 1.10E-09 | 552 R 0.998**                                                                      | 999 |
| 32 | Rv3711c | <i>dnaQ</i>   | DNA polymerase III epsilon subunit                  | 1.20E-09 | 211 L 0.999**                                                                      | 999 |
| 33 | Rv1812c |               | dehydrogenase                                       | 1.34E-09 | 30 P 0.984*                                                                        | 999 |
| 34 | Rv3835  |               | conserved membrane protein                          | 1.41E-09 | 294 L 0.977*                                                                       | 999 |

|    |         |              |                                              |          |                              |     |
|----|---------|--------------|----------------------------------------------|----------|------------------------------|-----|
| 35 | Rv2458  | <i>mmuM</i>  | homocysteine S-methyltransferase             | 2.07E-09 | 125 Y 0.998**                | 999 |
| 36 | Rv0236c |              | conserved membrane protein                   | 2.07E-09 | 1080 G 0.993**               | 317 |
| 37 | Rv2947c | <i>pks15</i> | polyketide synthase                          | 2.66E-09 | 333 A 0.999**                | 999 |
| 38 | Rv0082  |              | oxidoreductase                               | 2.71E-09 | 74 R 0.986*                  | 999 |
| 39 | Rv2450c | <i>rpfE</i>  | resuscitation-promoting factor               | 2.82E-09 | 20 T 0.991**, 126 R 0.997**  | 999 |
| 40 | Rv0095c |              | conserved hypothetical protein               | 3.34E-09 | 57 D 1.000**                 | 999 |
| 41 | Rv3425  | PPE57        | PPE family protein                           | 4.66E-09 | 128 T 0.999**                | 999 |
| 42 | Rv1704c | <i>cycA</i>  | D-serine/alanine/glycine transporter protein | 1.02E-08 | 93 L 0.994**                 | 999 |
| 43 | Rv0109  | PE_PGRS1     | PE-PGRS family protein                       | 1.14E-08 | 346 G 0.999**                | 999 |
| 44 | Rv2770c | PPE44        | PPE family protein                           | 1.69E-08 | 194 F 0.995**                | 999 |
| 45 | Rv0292  |              | conserved membrane protein                   | 1.76E-08 | 217 D 0.990*                 | 999 |
| 46 | Rv1378c |              | conserved hypothetical protein               | 1.93E-08 | 37 W 0.994**                 | 999 |
| 47 | Rv2584c | <i>apt</i>   | adenine phosphoribosyltransferase            | 2.24E-08 | 147 E 0.997**                | 999 |
| 48 | Rv1463  |              | ABC transporter ATP-binding protein          | 2.57E-08 | 198 E 0.992**                | 999 |
| 49 | Rv2090  |              | 5-3 exonuclease                              | 4.06E-08 | 358 F 0.994**                | 999 |
| 50 | Rv0881  |              | rRNA methyltransferase                       | 6.05E-08 | 115 R 0.999**                | 634 |
| 51 | Rv3776  |              | conserved hypothetical protein               | 6.16E-08 | 329 V 0.997**                | 611 |
| 52 | Rv0964c |              | hypothetical protein                         | 7.26E-08 | 124 T 0.993**                | 999 |
| 53 | Rv1186c |              | conserved hypothetical protein               | 1.56E-07 | 207 A 0.988*                 | 999 |
| 54 | Rv2439c | <i>proB</i>  | glutamate 5-kinase protein                   | 1.95E-07 | 226 S 0.993**                | 999 |
| 55 | Rv3151  | <i>nuoG</i>  | NADH dehydrogenase I chain G                 | 2.31E-07 | 474 M 0.983*                 | 999 |
| 56 | Rv3630  |              | conserved membrane protein                   | 2.69E-07 | 40 T 0.995**                 | 999 |
| 57 | Rv3077  |              | hydrolase                                    | 2.83E-07 | 310 G 0.999**                | 174 |
| 58 | Rv0388c | PPE9         | PPE family protein                           | 2.92E-07 | 138 A 1.000**, 139 Q 0.986*  | 48  |
| 59 | Rv0280  | PPE3         | PPE family protein                           | 3.21E-07 | 337 S 0.999**                | 999 |
| 60 | Rv0048c |              | membrane protein                             | 3.68E-07 | 248 E 0.992**, 250 V 0.992** | 999 |
| 61 | Rv3341  | <i>metA</i>  | homoserine O-acetyltransferase               | 4.18E-07 | 87 S 0.950*                  | 999 |
| 62 | Rv1232c |              | conserved hypothetical protein               | 4.47E-07 | 149 G 0.989*                 | 999 |
| 63 | Rv0465c |              | transcriptional                              | 4.49E-07 | 106 C 0.994**                | 999 |

| regulator |               |                    |                                                   |                 |                                  |           |
|-----------|---------------|--------------------|---------------------------------------------------|-----------------|----------------------------------|-----------|
| 64        | Rv0259c       |                    | conserved hypothetical protein                    | 4.66E-07        | 182 V 0.997**                    | 999       |
| 65        | Rv2436        | <i>rbsK</i>        | ribokinase                                        | 4.88E-07        | 174 G 0.966*, 282 A 0.999**      | 999       |
| 66        | Rv0226c       |                    | conserved membrane protein                        | 4.91E-07        | 379 P 0.968*                     | 999       |
| 67        | Rv2155c       | <i>murD</i>        | UDP-N-acetylmuramoylalanine-D-glutamate ligase    | 5.32E-07        | 247 G 0.995**                    | 999       |
| 68        | Rv2769c       | PE27               | PE family protein                                 | 5.33E-07        | 136 A 0.978*, 270 M 0.999**      | 999       |
| 69        | Rv2825c       |                    | conserved hypothetical protein                    | 6.22E-07        | 162 S 0.951*                     | 999       |
| 70        | Rv1915        | <i>aceAa</i>       | isocitrate lyase                                  | 6.34E-07        | 179 D 0.995**                    | 999       |
| 71        | Rv3764c       |                    | two component system sensor kinase                | 6.51E-07        | 246 R 0.961*                     | 999       |
| 72        | Rv1093        | <i>glyA1</i>       | serine hydroxymethyltransferase 1                 | 6.71E-07        | 36 A 0.903                       | 999       |
| 73        | Rv3084        | <i>lipR</i>        | acetyl-hydrolase/esterase                         | 7.63E-07        | none                             | 1         |
| 74        | Rv3879c       |                    | hypothetical alanine and proline rich protein     | 9.05E-07        | 729 S 0.983*                     | 472       |
| 75        | Rv0787        |                    | hypothetical protein                              | 1.05E-06        | 267 H 0.991**                    | 802       |
| 76        | Rv3777        |                    | oxidoreductase                                    | 1.20E-06        | 160 A 0.999**                    | 999       |
| 77        | Rv1326c       | <i>glgB</i>        | 1,4-alpha-glucan branching enzyme                 | 1.24E-06        | 470 S 0.908                      | 999       |
| 78        | Rv2495c       | <i>pdhC</i>        | dihydrolipoamide S-acetyltransferase E2 component | 1.27E-06        | 107 A 0.995**                    | 999       |
| 79        | <b>Rv0682</b> | <b><i>rpsL</i></b> | <b>30S ribosomal protein S12</b>                  | <b>1.50E-06</b> | <b>43 R 0.993**, 88 K 0.985*</b> | <b>68</b> |
| 80        | Rv3144c       | PPE52              | PPE family protein                                | 1.73E-06        | 226 S 0.969*                     | 999       |
| 81        | Rv3590c       | PE_PGRS5 8         | PE-PGRS family protein                            | 1.79E-06        | 314 A 0.877                      | 999       |
| 82        | Rv0425c       | <i>ctpH</i>        | metal cation transporting P-type ATPase           | 2.17E-06        | 689 V 0.979*                     | 571       |
| 83        | Rv2433c       |                    | hypothetical protein                              | 2.41E-06        | 26 L 0.998**                     | 999       |
| 84        | Rv2037c       |                    | conserved membrane protein                        | 2.67E-06        | 312 Y 0.933                      | 999       |
| 85        | Rv1895        |                    | dehydrogenase                                     | 2.75E-06        | 270 L 0.969*                     | 999       |
| 86        | Rv2741        | PE_PGRS4 7         | PE-PGRS family protein                            | 3.43E-06        | 271 S 0.944                      | 76        |
| 87        | Rv0355c       | PPE8               | PPE family protein                                | 3.63E-06        | 2571 A 0.648                     | 999       |
| 88        | Rv1321        |                    | conserved hypothetical protein                    | 3.68E-06        | 144 R 0.997**                    | 999       |
| 89        | Rv0103c       | <i>ctpB</i>        | cation-transporter P-type ATPase B                | 3.96E-06        | 22 S 0.949                       | 999       |
| 90        | Rv3666c       | <i>dppA</i>        | periplasmic dipeptide-                            | 4.13E-06        | 4 Q 0.801                        | 999       |

| binding lipoprotein |         |               |                                      |          |                           |     |
|---------------------|---------|---------------|--------------------------------------|----------|---------------------------|-----|
| 91                  | Rv3365c |               | conserved hypothetical protein       | 4.23E-06 | 38 P 0.989*, 687 S 0.953* | 999 |
| 92                  | Rv3514  | PE_PGRS5<br>7 | PE-PGRS family protein               | 4.24E-06 | 1462 T 0.780              | 999 |
| 93                  | Rv1320c |               | adenylate cyclase                    | 4.50E-06 | 531 A 0.977*              | 999 |
| 94                  | Rv2333c |               | conserved membrane transport protein | 4.94E-06 | 69 Y 0.964*               | 999 |
| 95                  | Rv1644  | <i>tsnR</i>   | 23S rRNA methyltransferase           | 5.10E-06 | 232 P 0.968*              | 999 |
| 96                  | Rv0417  | <i>thiG</i>   | thiamin biosynthesis protein         | 5.15E-06 | 75 C 0.991**              | 537 |
| 97                  | Rv1300  | <i>hemK</i>   | hypothetical protein                 | 5.55E-06 | 194 C 0.969*              | 999 |
| 98                  | Rv1127c | <i>ppdK</i>   | pyruvate, phosphate dikinase         | 6.39E-06 | 69 E 0.906                | 999 |
| 99                  | Rv0159c | PE3           | PE family protein                    | 6.98E-06 | 14 A 0.967*               | 999 |
| 100                 | Rv0284  |               | conserved membrane protein           | 7.57E-06 | 214 R 0.992**             | 999 |
| 101                 | Rv2290  | <i>lppO</i>   | lipoprotein                          | 8.59E-06 | 16 A 0.986*               | 999 |
| 102                 | Rv2160A |               | conserved hypothetical protein       | 8.64E-06 | 155 C 0.956*              | 605 |
| 103                 | Rv3303c | <i>lpdA</i>   | dihydrolipoamide dehydrogenase       | 8.97E-06 | 308 L 0.976*              | 999 |
| 104                 | Rv3511  | PE_PGRS5<br>5 | PE-PGRS family protein               | 9.15E-06 | 589 G 0.985*              | 496 |
| 105                 | Rv3347c | PPE55         | PPE family protein                   | 1.06E-05 | 786 V 0.969*              | 133 |
| 106                 | Rv1193  | <i>fadD36</i> | fatty-acid-CoA ligase                | 1.13E-05 | 124 P 0.963*              | 999 |
| 107                 | Rv3329  |               | aminotransferase                     | 1.16E-05 | 122 H 0.969*              | 999 |
| 108                 | Rv2482c | <i>plsB2</i>  | glycerol-3-phosphate acyltransferase | 1.23E-05 | 778 R 0.956*              | 999 |
| 109                 | Rv3497c | <i>mce4C</i>  | MCE-family protein                   | 1.24E-05 | none                      | 2   |



**Supplementary Table 15:** Genes significant by each of phyC, dN/dS and differential density for pyrazinamide resistance in increasing order of p-value. In bold and underlined are genes previously associated with resistance to pyrazinamide.

| <b>Phylogenetic Convergence</b> |                       |                    |                                                        |                      |                                                                                               |                                            |
|---------------------------------|-----------------------|--------------------|--------------------------------------------------------|----------------------|-----------------------------------------------------------------------------------------------|--------------------------------------------|
| Number                          | Rv-number             | Symbol             | Description                                            | P-value (<0.05)      | *Site & Gene convergence. ** Site convergence only (p-values ordered by site1, (site2), gene) | Convergent site(s)                         |
| 1                               | Rv0667                | <i>rpoB</i>        | DNA-directed RNA polymerase beta chain                 | <0.0001              |                                                                                               |                                            |
| <b>2</b>                        | <b><u>Rv2043c</u></b> | <b><u>pncA</u></b> | <b><u>pyrazinamidase/nicotinamidase</u></b>            | <b><u>0.0015</u></b> |                                                                                               |                                            |
| 3                               | Rv3795                | <i>embB</i>        | membrane indolylacetylinsitol arabinosyltransferase    | 0.0131               |                                                                                               |                                            |
| 4                               | Rv1971                | <i>mce3F</i>       | MCE-family protein                                     | 0.0345               |                                                                                               | 1187C                                      |
| <b>Differential density</b>     |                       |                    |                                                        |                      |                                                                                               |                                            |
| Number                          | Rvnumber              | Symbol             | Description                                            | P-value (<0.05)      |                                                                                               | Clustering Index                           |
| <b>1</b>                        | <b><u>Rv2043c</u></b> | <b><u>pncA</u></b> | <b><u>pyrazinamidase/nicotinamidase</u></b>            | <b><u>0.0001</u></b> |                                                                                               | <b><u>5</u></b>                            |
| <b>dN/dS</b>                    |                       |                    |                                                        |                      |                                                                                               |                                            |
| Number                          | Rvnumber              | Symbol             | Description                                            | P-value (<1.25E-5)   | Significant site(s) by Bayesian empiric bayes method * <0.05, **<0.01                         | Class dN/dS $\psi$ (Supplementary Table 7) |
| 1                               | Rv0747                | PE_PG<br>RS10      | PE-PGRS family protein                                 | 1.19E-21             | 295 K 1.000**,<br>300 S 1.000**                                                               | 505                                        |
| 2                               | Rv2931                | <i>ppsA</i>        | phenolphthiocerol synthesis type-I polyketide synthase | 3.31E-12             | 624 D 1.000**                                                                                 | 768                                        |
| 3                               | Rv0746                | PE_PG<br>RS9       | PE-PGRS family protein                                 | 1.24E-11             | 252 A 0.965*,<br>280 D 1.000**,<br>320 A 0.963*                                               | 329                                        |
| 4                               | Rv2584c               | <i>apt</i>         | adenine phosphoribosyltransferase                      | 1.55E-11             | 147 E 1.000**                                                                                 | 999                                        |
| 5                               | Rv0532                | PE_PG<br>RS6       | PE-PGRS family protein                                 | 1.77E-11             | 239 G 1.000**                                                                                 | 999                                        |
| 6                               | Rv0278c               | PE_PG<br>RS3       | PE-PGRS family protein                                 | 1.31E-10             | 807 G 0.998**                                                                                 | 999                                        |
| 8                               | Rv2917                |                    | conserved alanine and arginine rich protein            | 3.55E-10             | 594 L 0.999**                                                                                 | 999                                        |
| 9                               | Rv1753c               | PPE24              | PPE family protein                                     | 7.46E-10             | 488 T 0.996**                                                                                 | 999                                        |
| 10                              | Rv0280                | PPE3               | PPE family protein                                     | 1.45E-09             | 337 S 0.991**                                                                                 | 999                                        |
| 11                              | Rv0388c               | PPE9               | PPE family protein                                     | 3.77E-09             | 138 A 0.997**,<br>139 Q 1.000**                                                               | 101                                        |
| 12                              | Rv3711c               | <i>dnaQ</i>        | DNA polymerase III epsilon subunit                     | 9.22E-09             | 211 L 0.993**                                                                                 | 999                                        |
| 13                              | Rv2741                | PE_PG<br>RS47      | PE-PGRS family protein                                 | 1.24E-08             | 271 S 0.995**                                                                                 | 164                                        |
| 14                              | Rv1378c               |                    | conserved hypothetical protein                         | 1.94E-08             | 37 W 0.994**                                                                                  | 999                                        |

|    |         |               |                                                        |          |                                |     |
|----|---------|---------------|--------------------------------------------------------|----------|--------------------------------|-----|
| 15 | Rv2024c |               | conserved hypothetical protein                         | 2.16E-08 | 154 G 1.000**                  | 999 |
| 16 | Rv0279c | PE_PG<br>RS4  | PE-PGRS family protein                                 | 5.38E-08 | 77 V 0.995**, 352<br>G 0.994** | 88  |
| 17 | Rv2155c | <i>murD</i>   | UDP-N-acetylmuramoylalanine-D-<br>glutamate ligase     | 5.70E-08 | 247 G 0.995**                  | 999 |
| 18 | Rv0658c |               | conserved membrane protein                             | 1.33E-07 | 75 P 0.999**                   | 999 |
| 19 | Rv0050  | <i>ponA1</i>  | bifunctional penicillin-binding<br>protein             | 1.37E-07 | 631 P 0.991**                  | 999 |
| 20 | Rv3795  | <i>embB</i>   | membrane indolylacetylinsitol<br>arabinosyltransferase | 1.39E-07 | 306 I 0.989*, 354<br>D 0.996** | 420 |
| 21 | Rv3343c | PPE54         | PPE family protein                                     | 1.43E-07 | 103 A 0.854                    | 877 |
| 22 | Rv0058  | <i>dnaB</i>   | replicative DNA helicase                               | 1.68E-07 | 552 R 0.988*                   | 999 |
| 23 | Rv0236c |               | conserved membrane protein                             | 2.44E-07 | 1080 G 0.960*                  | 334 |
| 24 | Rv1971  | <i>mce3F</i>  | MCE-family protein                                     | 2.65E-07 | 396 E 0.994**                  | 999 |
| 25 | Rv0417  | <i>thiG</i>   | thiamin biosynthesis protein                           | 3.62E-07 | 75 C 0.996**                   | 999 |
| 26 | Rv0881  |               | rRNA methyltransferase                                 | 1.20E-06 | 115 R 0.996**                  | 999 |
| 27 | Rv0667  | <i>rpoB</i>   | DNA-directed RNA polymerase beta<br>chain              | 1.50E-06 | 435 D 0.994**,<br>452 L 0.983* | 73  |
| 28 | Rv2450c | <i>rpjE</i>   | resuscitation-promoting factor                         | 1.81E-06 | 126 R 0.991**                  | 645 |
| 29 | Rv0292  |               | conserved membrane protein                             | 2.15E-06 | 217 D 0.940                    | 999 |
| 30 | Rv2825c |               | conserved hypothetical protein                         | 3.30E-06 | 162 S 0.951*                   | 999 |
| 31 | Rv0159c | PE3           | PE family protein                                      | 3.93E-06 | 14 A 0.994**                   | 999 |
| 32 | Rv0323c |               | conserved hypothetical protein                         | 3.96E-06 | 142 G 0.948                    | 999 |
| 33 | Rv1704c | <i>cycA</i>   | D-serine/alanine/glycine<br>transporter protein        | 4.23E-06 | 93 L 0.956*                    | 999 |
| 34 | Rv1895  |               | dehydrogenase                                          | 5.38E-06 | 270 L 0.969*                   | 999 |
| 35 | Rv1396c | PE_PG<br>RS25 | PE-PGRS family protein                                 | 8.15E-06 | 66 S 0.988*                    | 999 |
| 36 | Rv0193c |               | hypothetical protein                                   | 9.92E-06 | 417 E 0.960*                   | 999 |
| 37 | Rv1394c | <i>cyp132</i> | cytochrome P450 132                                    | 1.13E-05 | 135 L 0.949                    | 999 |
| 38 | Rv1900c | <i>lipJ</i>   | lignin peroxidase                                      | 1.20E-05 | 204 M 0.947                    | 999 |
| 39 | Rv0758  | <i>phoR</i>   | two component system sensor<br>kinase                  | 1.23E-05 | 172 L 0.963*                   | 999 |
| 40 | Rv3458c | <i>rpsD</i>   | 30S ribosomal protein S4                               | 1.23E-05 | none                           | 4   |

**Supplementary Table 16:** Non-synonymous or non-coding SNPs relative to the phylogenetic ancestor in TIMs present in resistant isolates.

| Rvnumber /<br>intergenic<br>region no | gene symbol*              | SNP position and base                                                                                          | number of<br>unique sites |
|---------------------------------------|---------------------------|----------------------------------------------------------------------------------------------------------------|---------------------------|
| Rv0667                                | <i>rpoB</i>               | 1226-G 1268-C 1289-C 1303-T 1304-G 1304-T 1333-T 1334-T 1349-C 1349-T 1355-C 1447-T 1471-T 1684-A 2192-C 509-C | 14                        |
| Rv0006                                | <i>gyrA</i>               | 1127-T 2003-G 269-T 281-C 281-G 284-G 61-G 874-G                                                               | 7                         |
| Rv1908c                               | <i>katG</i>               | 1388-G 440-G 610-C 944-C 944-G 945-A                                                                           | 5                         |
| Rv3919c                               | <i>gid</i>                | 142-T 149-G 236-C 276-A 276-C 287-T 299-C 435-G 435-T 47-T                                                     | 8                         |
| Rv3854c                               | <i>ethA</i>               | 1141-C 127-A 149-G 227-A 409-C 452-C 616-T 750-G 760-T 844-G 904-G                                             | 11                        |
| Rv0682                                | <i>rpsL</i>               | 128-A 128-G 263-C                                                                                              | 2                         |
| 1183                                  | <i>inhA</i> promoter      | 125-T 127-T 134-A 1183-G 1183-A 1183-G                                                                         | 4                         |
| Rvnr01                                | <i>rrs</i>                | 1401-A 1401-G 499-T 514-C 517-T 906-G                                                                          | 5                         |
| Rv3795                                | <i>embB</i>               | 1040-T 1061-C 1217-A 1217-C 1490-G 1807-A 916-A 916-G 918-A 918-G 983-G                                        | 8                         |
| Rv2043c                               | <i>pncA</i>               | 152-G 170-G 172-C 188-C 30-C 309-G 357-A 388-A 394-A 395-C 403-C 502-C 512-T                                   | 13                        |
| 1899                                  | <i>eis</i> promoter       | 11-G 11-T 15-A 38-A                                                                                            | 3                         |
| Rv0050                                | <i>ponA1</i>              | 1095-T 123-G 1891-C 1891-T                                                                                     | 3                         |
| Rv0218                                |                           | 946-C 946-T                                                                                                    | 1                         |
| Rv2650c                               |                           | 302-C 302-T 646-G 8-A                                                                                          | 3                         |
| Rv3093c                               |                           | 630-C 630-G                                                                                                    | 1                         |
| Rv1446c                               | <i>opcA</i>               | 112-A 575-C 575-G                                                                                              | 2                         |
| Rv3245c                               | <i>mtrB</i>               | 1107-C 1549-A 1549-C 52-C 52-T 521-C                                                                           | 4                         |
| Rv0658c                               |                           | 125-A 224-C 224-T                                                                                              | 2                         |
| Rv2048c                               | <i>pks12</i>              | 11302-G 2749-C 2919-T 4954-C 4954-T 6441-A 7791-C 9011-C 9011-T 9848-G                                         | 8                         |
| Rv2436                                | <i>rbsK</i>               | 520-A 845-C 845-T                                                                                              | 2                         |
| Rv2931                                | <i>ppsA</i>               | 1872-C 1872-G 2407-A 2407-G 2630-A 2746-A 2864-C 3581-T 3967-A                                                 | 7                         |
| 922                                   | <i>pre-Rv1148c</i>        | 922-G 408-C 408-T 683-A                                                                                        | 3                         |
| Rv1180                                | <i>pks3</i>               | 1467-A                                                                                                         | 1                         |
| Rv3711c                               | <i>dnaQ</i>               | 227-A 227-G 631-G                                                                                              | 2                         |
| 1058                                  | <i>pre-Rvnr01(rrs)</i>    | 107-A 83-C                                                                                                     | 2                         |
| 1292                                  | <i>pre-Rv1632c</i>        | 51-C 51-G 1292-G                                                                                               | 2                         |
| 2867                                  | <i>pre-Rv3681c(whiB4)</i> | 158-A 230-T 29-A 29-G                                                                                          | 3                         |
| Rv2082                                |                           | 103-A 103-G 1127-C 1396-C 1913-C 1913-G 286-A 286-G 547-A 553-C 65-A 65-G 817-G 817-T                          | 9                         |
| Rv2155c                               | <i>murD</i>               | 239-C 739-C 739-G 892-A 892-G                                                                                  | 3                         |
| Rv0064                                |                           | 1252-T 1370-G 1648-G 1681-G 2197-A 2305-T 2717-C 2717-G 719-T                                                  | 8                         |
| Rv1319c                               |                           | 1165-T 1317-G 1317-T 1369-C 317-A                                                                              | 4                         |

|         |             |                                                                            |            |
|---------|-------------|----------------------------------------------------------------------------|------------|
| Rv0668  | <i>rpoC</i> | 1211-C 1450-G 2093-G 2094-A 2250-C 3098-C 3119-G 3276-C 3691-T             | 9          |
| Rv2896c |             | 457-G 457-T                                                                | 1          |
| Rv3446c |             | 1184-G 718-G 718-T 851-C 851-G                                             | 3          |
| Rv2024c |             | 139-C 139-T 461-A 461-G                                                    | 2          |
| Rv0280  | PPE3        | 1009-C 1009-T 769-G                                                        | 2          |
| Rv3478  | PPE60       | 1111-C 1160-C 1160-T 307-G 359-T 437-C                                     | 5          |
| Rv3345c | PE_PGRS50   | 1417-A 2399-C 380-C 4090-A 4090-C 4099-A 4223-C 638-G                      | 7          |
| Rv3021c | PPE47       | 1021-A 1021-G 371-G 665-C 665-G                                            | 3          |
| Rv0532  | PE_PGRS6    | 229-T 680-A 680-G 716-C 716-G                                              | 3          |
| Rv0279c | PE_PGRS4    | 1054-G 1054-T 1115-G 1115-T 229-A 229-G 230-GT 355-G 974-A 974-G           | 6          |
| Rv0746  | PE_PGRS9    | 1333-A 1333-G 2228-G 353-C 572-A 572-G 754-A 754-G 838-A 838-G 958-A 958-G | 7          |
| Rv0388c | PPE9        | 17-C 364-A 364-C 412-A 412-G 417-G 438-G 456-G                             | 6          |
| Rv0278c | PE_PGRS3    | 1012-C 120-G 1328-A 2419-C 2419-G                                          | 4          |
| Rv2741  | PE_PGRS47   | 752-A 811-A 811-G                                                          | 2          |
| Rv0747  | PE_PGRS10   | 1234-A 1729-G 673-A 673-G 679-C 679-G 884-A 884-G 898-A 898-G              | 6          |
| Rv3507  | PE_PGRS53   | 1010-C 2530-G 3908-A 3908-C 400-T 416-T                                    | 5          |
| Rv2853  | PE_PGRS48   | 1816-A 365-A 538-C 538-G                                                   | 3          |
| Rv3343c | PPE54       | 1123-C 1396-G 1855-G 2747-A 308-A 308-C 4075-G 4592-T 6320-C 6320-T 6542-T | 9          |
| Rv3347c | PPE55       | 1928-G 2357-C 2764-G 2768-A 2768-T 2975-C 364-A 364-G 5297-G 6776-T 9090-G | 9          |
| Rv0109  | PE_PGRS1    | 1036-C 1036-G                                                              | 1          |
|         |             | known dr=                                                                  | 80         |
|         |             | PPE=                                                                       | 78         |
|         |             | other=                                                                     | 85         |
|         |             | <b>Total=</b>                                                              | <b>243</b> |

\* genes highlighted in yellow represent PE/PPE family genes, in green are regions known to be associated with drug resistance in TB, not highlighted are other TIMs.

**Supplementary Table 18: Culture, Drug Sensitivity Testing, Fingerprinting.**

| <b>Isolate Source</b>                                                 | <b>Culture</b>                                                                                                                                                                                                                                                                               | <b>Drug Sensitivity Testing*</b>                                                                                                                                                                                                                                                                                                                               | <b>Fingerprinting (1, 2)</b> |
|-----------------------------------------------------------------------|----------------------------------------------------------------------------------------------------------------------------------------------------------------------------------------------------------------------------------------------------------------------------------------------|----------------------------------------------------------------------------------------------------------------------------------------------------------------------------------------------------------------------------------------------------------------------------------------------------------------------------------------------------------------|------------------------------|
| <b>Stellenbosch University, South Africa</b>                          | BACTEC MGIT 960 system (BD Diagnostics Systems, Sparks, MD)                                                                                                                                                                                                                                  | Indirect proportion method on Middlebrook 7H11 agar slants supplemented individually with: RIF (1.0 µg/ml), INH (0.2 µg/ml), EMB (7.5 µg/ml), OFLX (2.0 µg/ml), KAN (5.0 µg/ml), STR (2.0 µg/ml), AMK (5.0 µg/ml), CAP (10 µg/ml). PZA sensitivity was tested using the MGIT system (100 µg/ml).                                                               | Spoligotyping/ RFLP          |
| <b>Center for Disease Control, Atlanta, USA</b>                       | Middlebrook 7H9 broth supplemented with 10% (vol/vol) albumin-dextrose-catalase enrichment (Difco Laboratories) and 0.05% (vol/vol) Tween 80 (Sigma-Aldrich) at 37°C<br><br>until they reached an approximate optical density at 600 nm of 1.0 (corresponding to 5 x 10 <sup>8</sup> CFU/ml) | Indirect proportion method on Middlebrook 7H10 agar slants supplemented individually with: RIF (1 µg/ml), INH (0.2, 1, and 5µg/ml), EMB (5 µg/ml), OFLX (2 µg/ml), CIP (2 µg/ml), KAN (5 µg/ml), CAP (10µg/ml), and AMI (4 µg/ml). PZA was tested using the BACTEC 460 (100 µg/ml), MGIT (100 µg/ml), or agar proportion (25 µg/ml) method.                    | Spoligotyping                |
| <b>University of San Francisco, USA</b>                               | Lowenstein-Jensen slant culture, 7H11, 7H11 selective and BACTEC 460                                                                                                                                                                                                                         | BACTEC MGIT 960 AST system                                                                                                                                                                                                                                                                                                                                     | RFLP IS6110 and PGRS         |
| <b>British Columbia Center for Disease Control, Vancouver, Canada</b> | Lowenstein-Jensen slant culture and BACTEC MGIT 960 system (BD Diagnostics Systems, Sparks, MD)                                                                                                                                                                                              | BACTEC MGIT 960 AST system. INH (0.1 ug/ml) STR (1.0 ug/ml) EMB (5.0 ug/ml) RIF (1.0ug/ml)                                                                                                                                                                                                                                                                     | MIRU-VNTR, RFLP              |
| <b>Massachusetts State Laboratory (source country Peru, Russia)</b>   | Radiometric BACTEC 460 TB system (Becton-Dickinson)                                                                                                                                                                                                                                          | Indirect proportion method on Middlebrook 7H10 agar plates supplemented with : INH ( 0.2, 1, and 5 µg/mL), RIF (1 µg/mL), EMB (5 µg/mL), STR (2 and 10 µg/mL), KAN (5 µg/mL), CAP (10 µg/mL), ETH (5 µg/mL), CYS (30 µg/mL), PAS (1 µg/mL), AMK (6 µg/mL), LEVO (1 µg/mL), OFLX (2 µg/mL), and CIP (2 µg/mL). PZA was tested using the the BACTEC (100 µg/mL). | Spoligotype                  |
| <b>Universita di Siena, Italy</b>                                     | Lowenstein-Jensen medium and by the radiometric BACTEC 460 TB system (Becton-Dickinson).                                                                                                                                                                                                     | MICs were determined on Middlebrook 7H11 agar (Difco). Plates containing different drug concentrations were inoculated with approximately 2 x10 <sup>2</sup> and 2 x10 <sup>3</sup> CFU by a semiautomated inoculator (Multipoint Inoculator A400; Denley) and incubated at                                                                                    | RFLP                         |

37°C for 21 days. The following drugs were tested: INH, RIF, EMB, STR, RFB, CIP, OFLX, sparfloxacin, AMI, KAN, CAP, CS, PAS, thiacetazone, viomycin, and ETH. The MIC was defined as the lowest drug concentration inhibiting >99% of the inoculum. Susceptibility to PZA was determined by the BACTEC 460 TB method.

|                                                                        |                                 |                                                                                                                                                                                                         |      |
|------------------------------------------------------------------------|---------------------------------|---------------------------------------------------------------------------------------------------------------------------------------------------------------------------------------------------------|------|
| <b>Public Health<br/>Research<br/>Institute, UMDNJ,<br/>Newark, NJ</b> | Lowenstein-Jensen slant culture | Indirect agar proportion method using Middlebrook 7H10 agar plates containing the following drugs: RIF (1 µg/ml), INH (0.2, 1, and 5 µg/ml), EMB (5 µg/ml), CIP (2 µg/ml), KAN (5 µg/ml), CAP (10µg/ml) | RFLP |
|------------------------------------------------------------------------|---------------------------------|---------------------------------------------------------------------------------------------------------------------------------------------------------------------------------------------------------|------|

**\*Drug abbreviations explained in Supplementary Table 1.**

**Supplementary Table 19:**  $F_{ST}$  values for the 14 epiclusters. Distance measured by pairwise difference. Epicluster names and  $F_{ST}$  values underlined are those selected for pairwise convergence analysis.

|                | <u>Italian</u> | <u>K</u>    | <u>Peru1</u> | BC   | SF   | <u>CDC1</u> | <u>CDC2</u> | <u>KZN</u>  | <u>Mine</u> | Peru2 | <u>SA1</u>  | SA2  | Russia1 | Russia2 |
|----------------|----------------|-------------|--------------|------|------|-------------|-------------|-------------|-------------|-------|-------------|------|---------|---------|
| <u>Italian</u> | 0              | <u>0.96</u> | <u>0.84</u>  | 0.93 | 0.87 | <u>0.92</u> | <u>0.94</u> | <u>0.94</u> | <u>0.87</u> | 0.93  | <u>0.93</u> | 0.95 | 0.90    | 0.92    |
| <u>K</u>       | <u>0.96</u>    | 0           | <u>0.82</u>  | 0.95 | 0.86 | <u>0.94</u> | <u>0.91</u> | <u>0.93</u> | <u>0.87</u> | 0.41  | <u>0.54</u> | 0.93 | 0.84    | 0.91    |
| <u>Peru1</u>   | <u>0.84</u>    | <u>0.82</u> | 0            | 0.87 | 0.40 | <u>0.72</u> | <u>0.69</u> | <u>0.77</u> | <u>0.67</u> | 0.75  | <u>0.80</u> | 0.69 | 0.66    | 0.73    |
| <u>BC</u>      | 0.93           | 0.95        | 0.87         | 0    | 0.87 | 0.93        | 0.88        | 0.93        | 0.86        | 0.94  | 0.94        | 0.89 | 0.91    | 0.92    |
| <u>SF</u>      | 0.87           | 0.86        | 0.40         | 0.87 | 0    | 0.81        | 0.74        | 0.82        | 0.71        | 0.81  | 0.84        | 0.76 | 0.75    | 0.80    |
| <u>CDC1</u>    | <u>0.92</u>    | <u>0.94</u> | <u>0.72</u>  | 0.93 | 0.81 | 0           | <u>0.91</u> | <u>0.93</u> | <u>0.81</u> | 0.82  | <u>0.87</u> | 0.96 | 0.78    | 0.88    |
| <u>CDC2</u>    | <u>0.94</u>    | <u>0.91</u> | <u>0.69</u>  | 0.88 | 0.74 | <u>0.91</u> | 0           | <u>0.90</u> | <u>0.52</u> | 0.83  | <u>0.87</u> | 0.76 | 0.80    | 0.87    |
| <u>KZN</u>     | <u>0.94</u>    | <u>0.93</u> | <u>0.77</u>  | 0.93 | 0.82 | <u>0.93</u> | <u>0.90</u> | 0           | <u>0.82</u> | 0.85  | <u>0.89</u> | 0.93 | 0.71    | 0.72    |
| <u>Mine</u>    | <u>0.87</u>    | <u>0.87</u> | <u>0.67</u>  | 0.86 | 0.71 | <u>0.81</u> | <u>0.52</u> | <u>0.82</u> | 0           | 0.82  | <u>0.84</u> | 0.58 | 0.76    | 0.80    |
| <u>Peru2</u>   | 0.93           | 0.41        | 0.75         | 0.94 | 0.81 | 0.82        | 0.83        | 0.85        | 0.82        | 0     | 0.36        | 0.82 | 0.71    | 0.82    |
| <u>SA1</u>     | <u>0.93</u>    | <u>0.54</u> | <u>0.80</u>  | 0.94 | 0.84 | <u>0.87</u> | <u>0.87</u> | <u>0.89</u> | <u>0.84</u> | 0.36  | 0           | 0.87 | 0.80    | 0.86    |
| <u>SA2</u>     | 0.95           | 0.93        | 0.69         | 0.89 | 0.76 | 0.96        | 0.76        | 0.93        | 0.58        | 0.82  | 0.87        | 0    | 0.81    | 0.89    |
| <u>Russia1</u> | 0.90           | 0.84        | 0.66         | 0.91 | 0.75 | 0.78        | 0.80        | 0.71        | 0.76        | 0.71  | 0.80        | 0.81 | 0       | 0.62    |
| <u>Russia2</u> | 0.92           | 0.91        | 0.73         | 0.92 | 0.80 | 0.88        | 0.87        | 0.72        | 0.80        | 0.82  | 0.86        | 0.89 | 0.62    | 0       |

**Supplementary Table 20:** Pairwise convergence analysis: Epicluster pairs showing progressive resistance.

| Sensitive isolate (Id) | Resistant isolate (Id) | SNP cluster group ( <b>41</b> ) | New resistance to*              | SNPs total | SNPs non coding | Variant Genes | Average # SNP/Gene |
|------------------------|------------------------|---------------------------------|---------------------------------|------------|-----------------|---------------|--------------------|
| P1_ITL (6)             | P10_ITL (13)           | 6a                              | INH RIF RFB PZA STR             | 39         | 4               | 32            | 1.1                |
| KZN_DS (14)            | KZN_XDR (16)           | 5                               | INH RIF EMB STR CAP KAN OFLX    | 23         | 6               | 15            | 1.1                |
| M73 (29)               | M95 (32)               | 4                               | ETH EMB ?PZA ?RIF STR ?OFLX THA | 43         | 7               | 36            | 1.0                |
| 03R1382 (24)           | 02R1848 (22)           | 3b                              | INH ETH PZA STR KAN PAS         | 89         | 7               | 79            | 1.0                |
| R431 (36)              | R179 (37)              | 2                               | ETH EMB THA                     | 90         | 9               | 63            | 1.3                |
| K-1 (140)              | K-2 (141)              | 2                               | INH RIF EMB PZA STR             | 76         | 9               | 66            | 1.0                |
| CDC609 (49)            | CDC601 (41)            | 6b                              | KAN                             | 15         | 0               | 14            | 1.1                |
| CDC610 (50)            | CDC602 (42)            | 4                               | KAN                             | 4          | 1               | 3             | 1.0                |

\*Drug abbreviations explained in Supplementary Table 1. ? = possible because one of the two pairs of isolates was not tested for resistance to the drug listed.

**Supplementary Table 21:** K-S p-values for the differential density test.

| Resistance to* | K-S p-value           |
|----------------|-----------------------|
| Any drug       | $4.9 \times 10^{-46}$ |
| INH            | $3.6 \times 10^{-32}$ |
| RIF            | $2.0 \times 10^{-32}$ |
| EMB            | $1.7 \times 10^{-9}$  |
| STR            | $3.6 \times 10^{-17}$ |
| AG             | 0.51                  |
| PZA            | 1                     |
| FLQ            | 1                     |

\*Drug abbreviations explained in Supplementary Table 1.



Supplementary Note:

*Culture, Drug Sensitivity Testing, Fingerprinting:*

Isolates culture, drug sensitivity testing and molecular fingerprint methods are detailed in Supplementary Table 18. All isolates were grown in Middlebrook 7H9 medium (Difco) and stored at -80°C before DNA extraction. Restriction fragment length polymorphism analysis was performed based on the insertion sequence *IS6110*. Spoligotyping and MIRU-VNTR -24 was performed using established methods<sup>1,2</sup>.

*Sequencing:*

DNA was extracted by Qiagen method with minor modifications.

As the isolate collection and sequencing spanned a duration of 3-4 years, the sequencing methodology varied slightly for each isolate set. Isolates were sequenced by the Illumina GAIIx. Most isolates received one lane of 35 basepair (bp) single end reads. The Italian isolates (P2\_ITL, P4\_ITL, P5\_ITL, and P10\_ITL) and isolates with identification numbers 51-73 each received one lane of 50 bp single end reads. Isolates from Vancouver were sequenced using one lane of 50 bp paired reads. Isolate CDC\_603 received one lane of 75 bp reads. Isolates P3\_ITL, P6\_ITL, P8\_ITL, R179, R257, R451, and R439 were sequenced with one lane of 35 bp reads and resequenced on another lane of 75 bp reads to improve coverage.

For isolates Haarlem, C, W\_148 and 98\_r604 two whole genome shotgun plasmid libraries with 4kb and 10kb inserts were constructed for each isolate from genomic DNA. For W\_148 an additional fosmid library was created. Sequences were produced with Sanger technology and assembled using Arachne<sup>3</sup>. A draft assembly was generated for *Mycobacterium tuberculosis* C, W\_148, and 98\_r604 and a finished assembly for *Mycobacterium tuberculosis* Haarlem. The total coverage was 6.8 fold for isolate C, 15.1 fold for Haarlem, 6.5 fold for 98\_r604 and 10.5 fold for W\_148.

The raw sequence or genomic sequence data was not publically available for isolates K1 and K2 (ID 140,141), instead the substitutions (single nucleotide polymorphisms, SNPs) published by Niemann *et al.*<sup>4</sup> were used directly.

*Alignment and SNP calling:*

Sequence reads were aligned to the reference genome sequence for H37Rv using MAQ version 0.6.6<sup>5</sup>. Where relevant each read of a read pair was aligned independently. Reads that aligned with more than 3 mismatches in the first 24bp or that aligned to multiple locations were discarded. Sequence depth at each base was calculated as the number of unique reads aligned over each position. Supplementary Figure 4 displays the frequency histogram of average depth per isolate. Reference coverage was calculated as the percent of H37Rv bases covered by 20 reads or more, and displayed per isolate as a frequency histogram in Supplementary Figure 5. SNPs were called relative to H37Rv with the stringent minimum depth of 20 fold, and consensus quality of 20. The required maximum mapping quality of reads covering the SNP was set at 50.

SNPs that were within 5bp of an indel (insertion or deletion) or did not have an adjacent consensus quality of 20 were also discarded.

Whole-genome alignments of the completed genomes or contigs were generated using MUMMER version 3.22<sup>6</sup> and the H37Rv reference sequence to identify maximal stretches of perfectly matching regions and selecting optimal order-preserving assignments of matches between the genomes based on the longest increasing subsequence algorithm. SNPs were called relative to H37Rv using this alignment. SNPs occurring within 10bp of each other were excluded to minimize false positive calls.

#### *F<sub>ST</sub> analysis:*

Fixation index ( $F_{ST}$ ) was calculated as a measure of genetic differentiation between the 14 epiclusters using the standard formula in Arlequin v 3.5.1.2<sup>7</sup>. Pairwise difference was used as the distance method, and results were permuted 100 times to obtain significance values. Overall the level of differentiation was high between epiclusters (Figure 1C, Supplementary Table 19). Of the 8 epiclusters used in the pairwise convergence analysis only 2 pairs of epiclusters Mine-CDC2 and K-SA1 showed borderline differentiation with  $F_{ST}$  of 0.520 (still significantly high differentiation; Permutation test,  $p < 0.05$ ), and 0.535 (not significant) respectively; otherwise  $F_{ST}$  values between these epiclusters were all greater than 0.667.

#### *Intergenic regions definition:*

Intergenic regions were defined as a contiguous set of 1 or more bases not annotated to code for protein on either strand according to the TubercuList annotation of the reference isolate H37Rv<sup>8</sup>. They were numbered sequentially along the circular MTB genome starting from the intergenic region between genes Rv0001 and Rv0002.

#### *Unexplained drug resistance:*

To determine whether any of the candidate selected genes underlie previously unexplained drug resistance, we first performed deep targeted resequencing of the known resistance determinant regions using molecular inversion probes (MIP) to confirm the absence of known drug resistance mutations. There were 16 isolates (of the 44 resistant isolates WGS sequenced as part of this project) that appeared to have resistance unexplained by mutations in known resistance genes by whole genome sequencing (WGS). Thirty five resistant isolates (15 of the above 16 isolates and an additional 19 control resistant isolates) underwent MIP targeted resequencing. One isolate appeared to have unexplained resistance (03R0988 to kanamycin) from WGS but could not undergo MIP resequencing because of technical reasons, this isolate was excluded from this analysis. The average depth of MIP sequencing of the resistance regions was 2500 fold (range 100-38000). Among the 28 individual drug resistance phenotypes unexplained by WGS mutations, 8 were further explained by MIP sequencing through the capture of a total of 7 SNPs and 1 insertion in the known resistance genes. Overall of a total of 649 SNPs captured by MIP sequencing 64 were missed by WGS. A subsequent examination of the whole genome sequence results revealed that all missed SNPs had been detected but filtered out due to low read depth (<20 fold) at their respective sites. This is an expected advantage of deep sequencing over standard WGS. However there were no SNPs captured by WGS and not by MIPs, consistent with a very low false positive rate using the rigorous depth threshold of  $\geq 20$  fold. The genomic regions assessed and the number of isolates with verified unexplained resistance are both detailed in Supplementary Table 1. Of note, a relatively high proportion of fluoroquinolone

resistant strains (2/3 to ciprofloxacin, and 1/6 to ofloxacin) had phenotypic resistance but did not carry any *gyrA/B* resistance mutations. This may have at least partly resulted from our strain selection that over-represented strains without known mutations to explain drug resistance.

Overall, the conservative criteria for SNP calling likely led to some missed mutations that is likely to differentially affect strains sequenced with lower depth, because an important criterion for SNP calling at a site was for there to be >20 reads carrying a variant base at that site. The average depth of sequencing reads per strain averaged over all resistant strains was 57 fold, and the depth averaged over all sensitive strains was 68 fold (the difference is borderline statistically significant with p-value of 0.05 by the t-test). Thus we expect on average to miss slightly more SNPs in the resistant strains vs. the sensitive strains or at least miss SNPs at random from both pools of strains. Coupled with the fact that we had less WGS sequenced resistant (42 strains) than sensitive strains (74), our power for detecting SNPs relevant to drug resistance may have been weakened by this non-zero false negative SNP rate. However despite this we were able to find significant genes and SNP as associated with drug resistance. Furthermore our permutation test for significance was a conservative test that identified outlier SNPs and genes by generating the null distribution of SNP/genes using permutation of the resistance labels, and should have controlled for random sequencing error.

#### *Supplementary Tests for Selection:*

##### 1. dN/dS:

To identify genes with a significantly high dN/dS in the resistant branches of the phylogeny, we fit and compared three maximum likelihood models using the software package PAML v4.4<sup>9</sup>. We fit three likelihood models in parallel for each of MTB's 3998 protein coding genes. Two genes that contained an in-frame stop codon as part of the H37Rv sequence (Rv1792 and Rv3128c) were analyzed excluding this codon. We excluded the pseudogene Rv2427Ac from the analysis. The first model calculated the likelihood of the sequence data without positive selection. All tree branches were treated the same, with codons classified into four classes of purifying selection ( $dN/dS < 1$ ) or neutral evolution ( $dN/dS = 1$ ). The second model allowed for relaxed but not fully positive selection to varying levels on four codon classes in the resistant branches of the tree, and four codon classes of purifying selection in the sensitive branches (branch-site models). The last allowed for full positive selection ( $dN/dS > 1$ ) on one codon class in the resistant branches of the tree only. This paralleled the recommended models by Zhang et al. 2005<sup>9</sup>, the parameters used to fit the branch-site models paralleled those in the lysozyme example of the PAML software unless otherwise described above. A gene was considered positively selected if the model allowing for full positive selection was significantly more likely than the other two models by the likelihood ratio test with significance thresholds as recommended in Zhang et al. 2005<sup>9</sup> adjusted by the Bonferroni correction. Supplementary Table 2 lists all genes found to be under positive selection using the dN/dS method.

##### 2. Pairwise convergence:

Two types of convergence tests were performed: the first was based on resistant/sensitive isolate pairs chosen from isolates groups that shared a molecular fingerprint (epiclusters) and were isolated from the same epidemiological outbreak setting or patient. This test was independent of the isolate phylogeny. Eight epiclusters had a maximum within cluster SNP distance of 220 SNPs (98% percentile for within epicluster SNP distance). These 8 epiclusters each had a single

common ancestor in the SNP based phylogeny that was distinct from the ancestor for any of the other 7 epiclusters included. Within each such epicluster we chose the single most extensively resistant isolate and the most sensitive isolate as a resistant/sensitive (R/S) pair (Supplementary Table 20). We then identified R-specific SNPs, each defined as a nucleotide carried by the R isolate that differed from the nucleotide at the same site in the S isolate and in the H37Rv reference sequence (Supplementary Figure 1). As a measure of convergence among resistant isolates from different lineages, we counted R-specific SNPs that occurred in two or more epiclusters (Supplementary Table 2). Twelve such convergent SNPs were observed across the genome, whereas 0.02 would have been expected by chance (significant excess convergence;  $p = 4e-8$ ), assuming a Poisson distribution for the number of convergent mutations per site in R isolates, with rate parameter set as the total number of R-specific SNPs (summed over all R isolates) per site. We also identified genes that had two or more R specific SNP in any location along the gene length. Twenty six such genes were found whereas 10 would have been expected by chance assuming a Poisson distribution of R-specific SNP-containing genes across the genome (for genes containing 2 R-specific SNPs,  $p = 0.064$ ) (Supplementary Table 3).

The SNP cluster group (SCG) was determined for each epicluster based on the presence or absence of 9 previously described SNPs for lineage classification<sup>10</sup>. The 8 epiclusters belonged to 6 different SCGs. The K and SA epiclusters belonged to the same SCG. This was also the case for the Mine-CDC2 epiclusters (Supplementary Table 20). This observation is in congruence with the borderline  $F_{ST}$  values of about 0.5 described above for these two pairs of epiclusters. However each of these epiclusters had a distinct ancestor in the phylogeny, an inclusion requirement for the pairwise convergence analysis. Additionally R-specific SNPs shared by epiclusters belonging to the same SCG were not overrepresented (Supplementary Tables 2 & 3).

### 3. The density of resistance-specific SNPs:

We assembled a data set of all non-synonymous or intergenic SNPs inferred in leaf branches (extant isolates) of the phylogeny, and divided these substitutions into separate pools for resistant and sensitive branches. We compared the distribution of distances between the SNPs in each pool using the Kolmogorov-Smirnov test, and found that resistance-associated SNPs tended to cluster significantly closer together in the genome than sensitive-associated SNPs (Supplementary Table 21). To identify which regions of the genome were contributing to the difference in SNP distribution between the sensitive and resistance pools we defined the difference in the number of resistant and sensitive substitutions as a resistant SNP 'clustering index' for each gene or intergenic region. We calculated significance values by resampling (10,000 times) to determine the empirical null distribution for a region having  $\geq x$  resistant SNPs and  $\leq y$  sensitive SNPs, similar to our approach in the convergence methodology above. The empirical significance values were likely conservative, as two benchmark resistance genes, *gyrA* and *gid*, did not meet the significance threshold of  $p < 0.05$  (Supplementary Table 6). Those two genes nevertheless showed a clustering index of 5 (99.5th percentile for clustering index). We therefore reasoned that a cutoff of clustering index  $\geq 5$  would provide more power to identify genes that were of high relevance to resistance.

As the pool of resistant isolates was of different size than the pool of sensitive isolates (47 vs 76 isolates), we performed a sensitivity analysis to confirm that this difference did not affect our analysis results. We sampled the most resistant isolate from each epicluster and non-clustered isolates into a pool of 20 resistant isolates. We similarly sampled sensitive isolates from each epicluster and at random from non-clustered isolates to make up a pool of 20 sensitive isolates.

We compared the distributions of distances between resistance- and sensitive-associated SNPs, using the Kolmogorov-Smirnov test as described above, and repeatedly obtained a highly significant  $p$ -value (order of magnitude  $10^{-45}$ - $10^{-50}$ ). This supports that the tight clustering of resistance-associated SNPs in the genome is not merely due to oversampling relative to sensitive isolates.

We only used the SNPs inferred in the terminal/leaf branches of the phylogeny to control for lineage specific SNPs that reflect neutral evolution or evolution unrelated to drug resistance. Most of the resistance seen in our phylogeny arises in the terminal branches, whereas most of lineage-determining SNPs are inferred deeper in the phylogeny. Some resistance does arise in the 2-3 branches prior to the leaf, and thus excluding these does decrease our method's sensitivity to some extent. We accepted this loss in sensitivity in order to keep our method conservative. Supplementary Figure 6 shows the number of distinct resistant isolate 'genotypes' that SNPs in regions with a clustering index of  $\geq 5$ . Each epicluster was considered to have a distinct genotype, additionally each isolate isolated from non-outbreak settings or one that had a unique molecular fingerprint was considered to have a distinct genotype. Supplementary Figure 6 demonstrates that isolates accruing these resistance-associated SNPs were diverse (belonged to 3 or more different genotypes) for each region of high clustering index. If lineage-determining SNPs biased this analysis we would have expected that some regions of high clustering index derived all or most of their SNPs from isolates with the same genotype, and this was not the case. We repeated this analysis defining genotype as SNP cluster categories (9 possible categories). This showed similar results with isolates contributing SNPs belonging to a median of 5 SCGs with interquartile range of 4-6 SCGs.

#### 4. PhyC analysis including synonymous sites.

A secondary PhyC analysis was performed, this time including synonymous sites as well as nonsynonymous and intergenic sites. Significance levels were again obtained using a permutation based test as described above but including all mutations including at synonymous sites. In total, 8 of the TIMs associated with drug resistance ( $p < 0.05$ ), were synonymous (Supplementary Table 9).

#### *Functional annotation:*

Enrichment testing was performed using the gene functional category definitions for H37Rv<sup>8</sup>, and using COGs<sup>11</sup>. Standard Fisher exact tests and EASE scores were calculated as defined by DAVID bioinformatics resources<sup>12</sup>. All three candidate gene sets (identified by convergence, differential density, or dN/dS) were significantly enriched in the PE/PPE gene family of H37Rv genes with EASE scores: convergence  $1.64 \times 10^{-10}$ , dN/dS  $2.25 \times 10^{-10}$ , and differential density 0.00491. The PE/PPE gene/protein group share sequence motifs and amino-acid composition but are not technically grouped by protein function. In fact many members of this gene family are of unknown function<sup>8</sup>. The differential density regions were borderline enriched for the cell membrane, cell wall/envelope COG category (Fisher exact test,  $p = 0.046$ , EASE  $p = 0.1822$ ), otherwise the gene sets were not significantly enriched in other functional or COGs.

We assessed the potential significance of each of the TIMs through a systematic search for an association with known drug resistance genes, drug efflux pumps, genes involved in cell wall biogenesis or remodeling, genes that affect intrinsic drug resistance in MTB or non-tuberculous mycobacteria, and genes involved in DNA repair, replication or recombination.

To identify genes closely associated with DR genes, we first determined whether selected regions were known promoters of known DR genes/loci. We searched TB Database<sup>13</sup> to determine whether the expression of any TIMs was associated with exposure to rifampin, INH, ethambutol, pyrazinamide, streptomycin, amikacin, kanamycin, or a fluoroquinolone. We considered an association significant if the z-score was greater or equal to 3. Next, we used the String 9.0 database of known and predicted protein-protein interactions<sup>14</sup> to determine interactors of each gene, using a confidence score of .4 and assessing no more than 50 interactors. Lastly, we looked to see if known DR genes were co-expressed with each selected candidate, using an arbitrary cut-off of .6 as evidence of moderate co-expression. We classified selected genes as strongly associated with drug resistance genes if they met at least two of these criteria. Only two loci met these criteria: the *rrs* promoter and *rpoC*.

Next, we cross-matched our convergence results against a list of known and putative drug efflux pumps<sup>15</sup>. Although no efflux pumps were identified among genes that met our statistical criteria for TIMs, we found that several efflux pumps, including the ABC transporters Rv0194 and Rv1463, have a larger number of independent mutations in resistant strains relative to sensitive strain. In addition, 2 unrelated XDR isolates acquired a mutation in the putative efflux pump, Rv3806, in the ‘pairwise’ convergence analysis.

We then conducted a systematic search to determine whether our TIMs played a role in cell wall biogenesis, remodeling or intrinsic drug resistance. Using the following search terms: tuberculosis, cell wall, permeability and intrinsic drug resistance, we searched for each gene and each search term. Publication titles and abstracts were scanned to identify papers that assessed the role of each gene in either MTB or non-tuberculous mycobacteria and experiments that document loss of cell wall permeability to antibiotics upon deletion of each gene were recorded. We identified 5 genes that contribute to cell wall structure: *ppsA*, *pks3*, *pks12*, *ponA1* and *murD*. Three of these were also found to be associated with loss of intrinsic antibiotic resistance in either MTB or a non-tuberculous mycobacteria. In addition, *mtrB* was shown to affect intrinsic antibiotic resistance in MAI.

Next, we matched our genes against a list of known and putative genes involved in DNA repair, replication and recombination in MTB<sup>16</sup>. We also matched the list against genes identified in screens for *lexA* promoter binding motifs<sup>17</sup> and for RecA independent binding motifs<sup>18</sup>. One gene, *dnaQ*, was identified as a known DNA repair gene, one was identified in the screen for *recA* independent motifs (Rv2024) and another was a “soft” hit for a *lexA* binding site (*rbsK*).

#### *Network construction:*

In order to further identify interactions between TIMs and other genes known to be related to drug resistance we constructed protein-protein interaction networks for each of the TIMs. Two global protein-protein interaction networks of TB have been published. The first deduced interactions using bacterial two hybrid analysis and was verified to have more than 60% success rate<sup>19</sup>. The second deduced them based on agreement of two or more of the Rosetta stone, Phylogenetic profile, Conserved Gene Neighbor, or Operon methods<sup>20</sup>. We used linkages from either network to construct local networks for each gene TIM (example networks displayed in Supplementary Figure 7) using Cytoscape v2.8.2<sup>21</sup>. We examined first and second neighbors for each gene of interest. In addition to protein-protein interactions shows in Supplementary Figure 7, proteins PonA1 and MurD were third neighbors connected though both PbpA and PonA2.

### *PE/PPE/diversity analysis:*

The PE/PPE gene family, characterized by unique sequence motifs and a specific amino-acid composition, was significantly overrepresented among TIMs (enrichment EASE score for convergence hits  $1.64 \times 10^{-10}$ ). This family has not been previously associated with drug resistance or compensation. Consistent with previous studies<sup>22</sup>, we observe extremely high diversity in this gene family. To obtain a measure of diversity in PE/PPE genes, and compare it to other genes, we counted the number of SNPs inferred in the terminal branches of the phylogeny, per gene or intergenic region. We pooled this count for all 123 *M. tuberculosis* isolates, and excluded the root isolate *M. canetti*. Genome-wide, the diversity count had a median and interquartile range of 0 (0-2 SNPs/region). The PE/PPE family of genes as whole was more diverse with a SNP count median of 3 (IQR 1-8/gene). The Wilcoxon rank sum test showed this higher SNP density in PE/PPE genes to be significant, with a *p* value of  $2 \times 10^{-16}$ . The subset of the PE/PPE genes that were TIMs showed more extreme levels of diversity with a median of 43 (IQR 16-52.5). The known drug resistance genes also showed high levels of diversity with a median of 14.0 (IQR 10.5-19.5), but not to the level of the PE/PPE genes. Furthermore the non-PE/PPE subset of candidate TIMs showed similar levels of diversity as the known drug resistant genes with a median of 13.5 (IQR 11-15.56 SNPs/gene; not significantly different from the known resistance genes by the Wilcoxon rank sum test).

Such high diversity makes it difficult to distinguish between positive selection or a combination of relaxed purifying selection on PE/PPE genes and resistant isolate-specific population bottlenecks. If only a small fraction of PE/PPE diversity is fixed after population bottlenecks in independent resistant lineages, this would cause spurious signals of selection in these genes (high dN/dS, frequent convergence, and a high density of mutations) in resistant isolates. At some point in the last ~70 years, since the advent of antibiotics for TB, MTB isolates have likely been subjected to severe bottlenecks due to drug treatment. Resistant isolates would thus be descended from the survivors of these bottlenecks, 'scarred' with many substitutions in PE/PPE genes, even in the absence of positive selection. Distinguishing between positive selection and bottlenecks as causes of resistance-associated substitutions in PE/PPE genes provides a challenge for future research.

### *SNP calling in repetitive regions*

The stringent MAQ mapping qualities required to call SNPs were designed to prevent false-positive SNP calling in repetitive genomic regions, prone to mismatching. To further guard against mis-mapping, we defined the “36merRedundancy” score as the number of times a unique 36 bp sequence is observed in the H37Rv reference genome. We picked a 36bp length because this was the minimum sequence read length for any strain in our data set. Supplementary Figure 8 shows the 36merRedundancy score overlaid with a known repetitive region of the genome (PPE60). In regions with high 36merRedundancy scores, no reads are mapped and therefore no SNPs are called. Yet in the non-repetitive region within the PPE60 gene, there was low 36merRedundancy and good quality read mapping, providing confidence in the SNP call. This example is representative of other repetitive regions of the genome.

The example described above suggests that mis-mapping is not likely to affect the quality of our SNP calls. Nevertheless, we repeated our analyses after excluding SNPs called at the borders of repetitive regions. At the borders of repetitive sequences, uniquely mapped reads (to the

neighboring unique sequence) can provide data on the sequence within repetitive regions. Of the 924 SNP sites in all 50 convergent regions (11 known, 39 candidate), only 39 SNP sites occurred in these border regions (as measured by the 36mer-redundancy mentioned above). We repeated the PhyC test excluding these 39 SNPs, and our results were minimally different: all the genes and regions of known function are equally significant. The only two regions that no longer achieve significance with exclusion of these sites are intergenic region 2867 (Intergenic area between Rv3680 and transcriptional regulator whib-like) and PPE47. All other SNPs (924-39=885 SNPs) map to unique sequences in the reference genome and thus remain the same as our original results.

#### References:

1. Kamerbeek, J. *et al.* Simultaneous detection and strain differentiation of *Mycobacterium tuberculosis* for diagnosis and epidemiology. *J. Clin. Microbiol.* **35**, 907–914 (1997).
2. Supply, P. *et al.* Proposal for Standardization of Optimized Mycobacterial Interspersed Repetitive Unit-Variable-Number Tandem Repeat Typing of *Mycobacterium Tuberculosis*. *J. Clin. Microbiol.* **44**, 4498–4510 (2006).
3. Jaffe, D. B. *et al.* Whole-genome sequence assembly for mammalian genomes: Arachne 2. *Genome Res.* **13**, 91–96 (2003).
4. Niemann, S. *et al.* Genomic diversity among drug sensitive and multidrug resistant isolates of *Mycobacterium tuberculosis* with identical DNA fingerprints. *PLoS ONE* **4**, e7407 (2009).
5. Li, H., Ruan, J. & Durbin, R. Mapping short DNA sequencing reads and calling variants using mapping quality scores. *Genome Res.* **18**, 1851–1858 (2008).
6. Kurtz, S. *et al.* Versatile and open software for comparing large genomes. *Genome Biol.* **5**, R12 (2004).
7. Excoffier, L. & Lischer, H. E. L. Arlequin suite ver 3.5: a new series of programs to perform population genetics analyses under Linux and Windows. *Mol. Ecol. Resour.* **10**, 564–567 (2010).
8. Lew, J. M., Kapopoulou, A., Jones, L. M. & Cole, S. T. TubercuList--10 years after. *Tuberc. Edinb. Scotl.* **91**, 1–7 (2011).
9. Zhang, J., Nielsen, R. & Yang, Z. Evaluation of an improved branch-site likelihood method for detecting positive selection at the molecular level. *Mol. Biol. Evol.* **22**, 2472–2479 (2005).
10. Alland, D. *et al.* Role of large sequence polymorphisms (LSPs) in generating genomic diversity among clinical isolates of *Mycobacterium tuberculosis* and the utility of LSPs in phylogenetic analysis. *J. Clin. Microbiol.* **45**, 39–46 (2007).
11. Tatusov, R. L. *et al.* The COG database: an updated version includes eukaryotes. *BMC Bioinformatics* **4**, 41 (2003).
12. Huang, D. W., Sherman, B. T. & Lempicki, R. A. Systematic and integrative analysis of large gene lists using DAVID bioinformatics resources. *Nat. Protoc.* **4**, 44–57 (2009).
13. Galagan, J. E. *et al.* TB database 2010: overview and update. *Tuberc. Edinb. Scotl.* **90**, 225–235 (2010).
14. Szklarczyk, D. *et al.* The STRING database in 2011: functional interaction networks of proteins, globally integrated and scored. *Nucleic Acids Res.* **39**, D561–568 (2011).
15. Louw, G. E. *et al.* A balancing act: efflux/influx in mycobacterial drug resistance. *Antimicrob. Agents Chemother.* **53**, 3181–3189 (2009).



16. Dos Vultos, T., Mestre, O., Tonjum, T. & Gicquel, B. DNA repair in *Mycobacterium tuberculosis* revisited. *FEMS Microbiol. Rev.* **33**, 471–487 (2009).
17. Smollett, K. L. *et al.* Global analysis of the regulon of the transcriptional repressor LexA, a key component of SOS response in *Mycobacterium tuberculosis*. *J. Biol. Chem.* **287**, 22004–22014 (2012).
18. Gamulin, V., Cetkovic, H. & Ahel, I. Identification of a promoter motif regulating the major DNA damage response mechanism of *Mycobacterium tuberculosis*. *FEMS Microbiol. Lett.* **238**, 57–63 (2004).
19. Wang, Y. *et al.* Global protein-protein interaction network in the human pathogen *Mycobacterium tuberculosis* H37Rv. *J. Proteome Res.* **9**, 6665–6677 (2010).
20. Strong, M. *et al.* Visualization and interpretation of protein networks in *Mycobacterium tuberculosis* based on hierarchical clustering of genome-wide functional linkage maps. *Nucleic Acids Res.* **31**, 7099–7109 (2003).
21. Smoot, M. E., Ono, K., Ruscheinski, J., Wang, P.-L. & Ideker, T. Cytoscape 2.8: new features for data integration and network visualization. *Bioinform. Oxf. Engl.* **27**, 431–432 (2011).
22. Machowski, E. E., Barichievy, S., Springer, B., Durbach, S. I. & Mizrahi, V. In vitro analysis of rates and spectra of mutations in a polymorphic region of the Rv0746 PE\_PGRS gene of *Mycobacterium tuberculosis*. *J. Bacteriol.* **189**, 2190–2195 (2007).
23. Maus, C. E., Plikaytis, B. B. & Shinnick, T. M. Molecular Analysis of Cross-Resistance to Capreomycin, Kanamycin, Amikacin, and Viomycin in *Mycobacterium tuberculosis*. *Antimicrob. Agents Chemother.* **49**, 3192–3197 (2005).
24. Agerton, T. *et al.* Transmission of a highly drug-resistant strain (strain W1) of *Mycobacterium tuberculosis*. Community outbreak and nosocomial transmission via a contaminated bronchoscope. *JAMA J. Am. Med. Assoc.* **278**, 1073–1077 (1997).
25. Morlock, G. P. *et al.* Phenotypic characterization of *pncA* mutants of *Mycobacterium tuberculosis*. *Antimicrob. Agents Chemother.* **44**, 2291–2295 (2000).
26. Ioerger, T. R. *et al.* Genome Analysis of Multi- and Extensively-Drug-Resistant Tuberculosis from KwaZulu-Natal, South Africa. *PLoS One* **4**, (2009).
27. Gardy, J. L. *et al.* Whole-genome sequencing and social-network analysis of a tuberculosis outbreak. *N. Engl. J. Med.* **364**, 730–739 (2011).
28. Calver, A. D. *et al.* Emergence of increased resistance and extensively drug-resistant tuberculosis despite treatment adherence, South Africa. *Emerg. Infect. Dis.* **16**, 264–271 (2010).
29. Meacci, F. *et al.* Drug resistance evolution of a *Mycobacterium tuberculosis* strain from a noncompliant patient. *J. Clin. Microbiol.* **43**, 3114–3120 (2005).
30. Johnson, R. *et al.* An outbreak of drug-resistant tuberculosis caused by a Beijing strain in the western Cape, South Africa. *Int. J. Tuberc. Lung Dis. Off. J. Int. Union Tuberc. Lung Dis.* **10**, 1412–1414 (2006).
31. Kato-Maeda, M. *et al.* Use of whole genome sequencing to determine the microevolution of *Mycobacterium tuberculosis* during an outbreak. *PLoS One* **8**, e58235 (2013).
32. Comas, I. *et al.* Human T cell epitopes of *Mycobacterium tuberculosis* are evolutionarily hyperconserved. *Nat. Genet.* **42**, 498–503 (2010).
33. Gagneux, S. *et al.* Variable host-pathogen compatibility in *Mycobacterium tuberculosis*. *Proc. Natl. Acad. Sci. U. S. A.* **103**, 2869–2873 (2006).

34. Hirsh, A. E., Tsolaki, A. G., DeRiemer, K., Feldman, M. W. & Small, P. M. Stable association between strains of *Mycobacterium tuberculosis* and their human host populations. *Proc. Natl. Acad. Sci. U. S. A.* **101**, 4871–4876 (2004).
35. Ioerger, T. R. *et al.* The non-clonality of drug resistance in Beijing-genotype isolates of *Mycobacterium tuberculosis* from the Western Cape of South Africa. *BMC Genomics* **11**, 670 (2010).
